# Supplementary material for: Efficient construction of diverse spiro[indoline-3,4′-pyrrolo[3,4-b]pyridines] via [3 + 3] cycloaddition of MBH carbonates of isatins with β-enamino maleimides
Source: Royal Society of Chemistry journal article supplement (doi:10.1039/d2ob01257j), 2022-01-01

**Efficient Construction of Diverse Spiro[indoline-3,4'-pyrrolo[3,4-*b*]pyridines] via  
[3+3] Cycloaddition of MBH Carbonates of Isatins with  $\beta$ -Enamino Maleimides<sup>a</sup>**

Liu-Na Pan, Jing Sun,\* Xue-Yan Liu, Chao-Guo Yan\*

**Supporting Information**

|                                                                     |               |
|---------------------------------------------------------------------|---------------|
| <b>Figures of the single crystal structures</b>                     | <b>s2-s3</b>  |
| <b>Table S1-S4</b> The single crystal data of compounds             | <b>s4-s7</b>  |
| <b>Experimental section</b>                                         | <b>s8</b>     |
| <b>Characterization data</b>                                        | <b>s8-s27</b> |
| <b>Copies of <sup>1</sup>H, <sup>13</sup>C NMR and HRMS spectra</b> | <b>s28-99</b> |

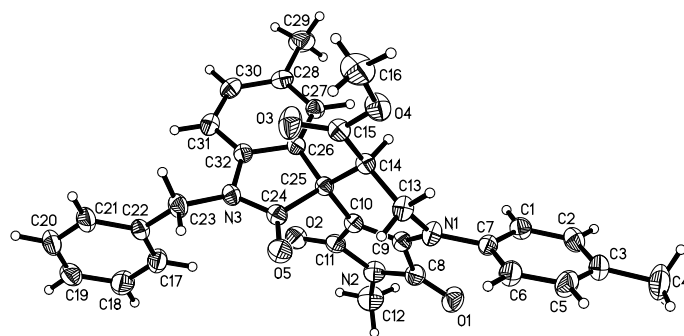

**Fig. 1** Single crystal structure of the compound **3i**

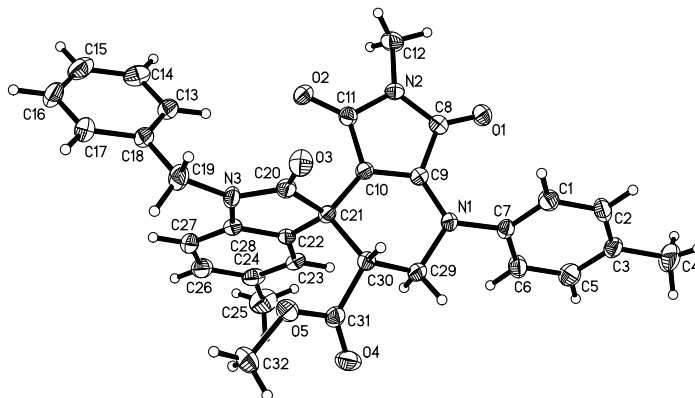

**Fig. 2** Single crystal structure of the compound **3i'**

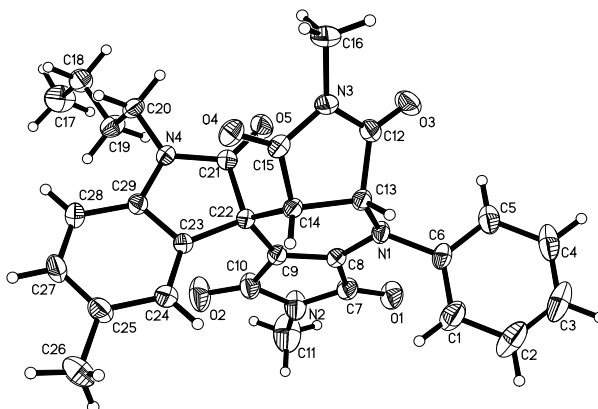

**Fig. 3** Single crystal structure of the compound **5e**

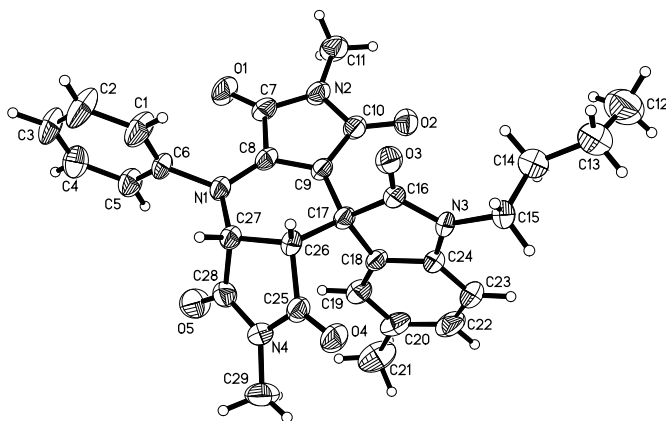

**Fig. 4** Single crystal structure of the compound **5e'**

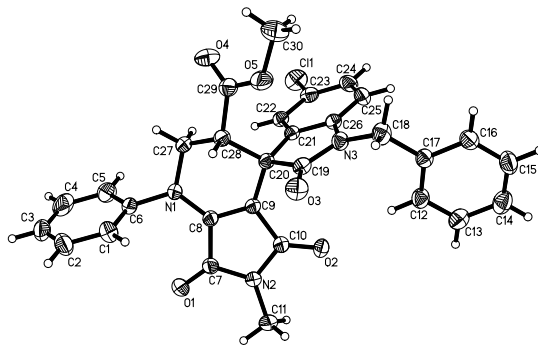

**Fig. s1** Single crystal structure of the compound **3k'**

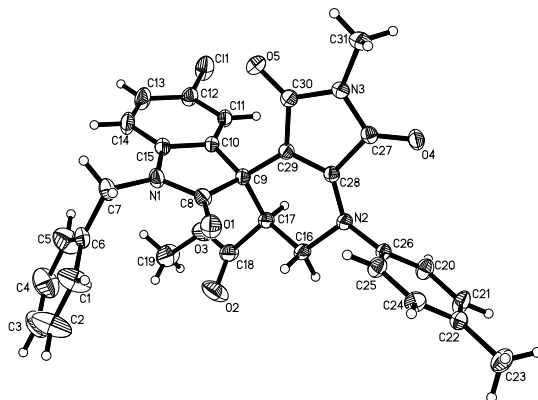

**Fig. s2** Single crystal structure of the compound **3l**

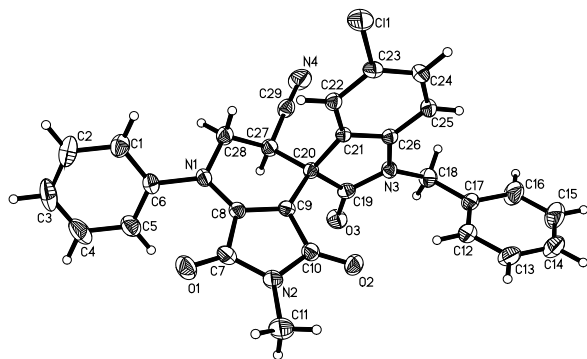

**Fig. s3** Single crystal structure of the compound **4c'**

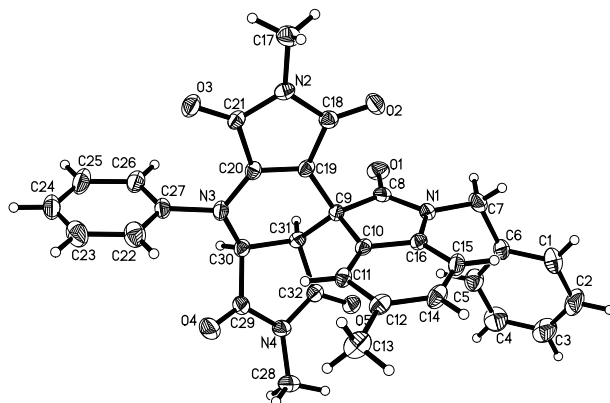

**Fig. s4** Single crystal structure of the compound **5b'**

**Table S1** The single crystal data of compounds **3i** and **3i'**

| Phase                                                  | <b>3i</b>                                                        | <b>3i'</b>                                                                       |
|--------------------------------------------------------|------------------------------------------------------------------|----------------------------------------------------------------------------------|
| Empirical formula                                      | C <sub>32</sub> H <sub>29</sub> N <sub>3</sub> O <sub>5</sub>    | C <sub>32</sub> H <sub>29</sub> N <sub>3</sub> O <sub>5</sub> ·CHCl <sub>3</sub> |
| Formula weight                                         | 535.58                                                           | 654.95                                                                           |
| Temperature/K                                          | 296(2) K                                                         | 296(2) K                                                                         |
| Wavelength/ Å                                          | 0.71073                                                          | 0.71073                                                                          |
| Crystal system                                         | Monoclinic                                                       | Monoclinic                                                                       |
| Space group                                            | P2(1)/c                                                          | P2(1)/c                                                                          |
| <i>a</i> / Å                                           | 12.7017(18)                                                      | 13.0140(14)                                                                      |
| <i>b</i> / Å                                           | 20.368(3)                                                        | 11.1280(11)                                                                      |
| <i>c</i> / Å                                           | 10.6831(15)                                                      | 21.958(3)                                                                        |
| α (°)                                                  | 90                                                               | 90                                                                               |
| β (°)                                                  | 91.573(5)                                                        | 94.274(4)                                                                        |
| γ (°)                                                  | 90                                                               | 90                                                                               |
| <i>V</i> (Å <sup>3</sup> )                             | 2762.8(7)                                                        | 3171.1(6)                                                                        |
| <i>Z</i>                                               | 4                                                                | 4                                                                                |
| Calculated density (g·cm <sup>-3</sup> )               | 1.288                                                            | 1.372                                                                            |
| Absorption coefficient (mm <sup>-1</sup> )             | 0.088                                                            | 0.335                                                                            |
| <i>F</i> (000)                                         | 1128                                                             | 1360                                                                             |
| θ range / (°)                                          | 2.153 to 25.999                                                  | 2.343 to 24.997                                                                  |
| Limiting indices                                       | -15<= <i>h</i> <=14, -25<= <i>k</i> <=20,<br>-13<= <i>l</i> <=12 | -15<= <i>h</i> <=15, -13<= <i>k</i> <=13,<br>-25<= <i>l</i> <=26                 |
| Reflections collected/unique                           | 27432 / 5405<br>[R(int) = 0.0410]                                | 27460 / 5577<br>[R(int) = 0.0672]                                                |
| Completeness to theta                                  | 99.6 %                                                           | 99.8 %                                                                           |
| Max. and min. transmission                             | 0.7456 and 0.6871                                                | 0.7456 and 0.6854                                                                |
| Refinement method                                      | Full-matrix<br>least-squares on F <sup>2</sup>                   | Full-matrix<br>least-squares on F <sup>2</sup>                                   |
| Data/restraints/parameters                             | 5405 / 0 / 365                                                   | 5577 / 0 / 401                                                                   |
| Goodness-of-fit on <i>F</i> <sup>2</sup>               | 1.020                                                            | 1.075                                                                            |
| Final <i>R</i> indices [I>2σ(I)]                       | R1 = 0.0491, wR2 = 0.1139                                        | R1 = 0.0690, wR2 = 0.1786                                                        |
| <i>R</i> indices (all data)                            | R1 = 0.0850, wR2 = 0.1304                                        | R1 = 0.1313, wR2 = 0.1993                                                        |
| Largest diff. peak and hole<br>/(e · Å <sup>-3</sup> ) | 0.239 and -0.205                                                 | 0.474 and -0.679                                                                 |

**Table S2** The single crystal data of compounds **3k'** and **3l**

| Phase                                                  | <b>3k'</b>                                                       | <b>3l</b>                                                        |
|--------------------------------------------------------|------------------------------------------------------------------|------------------------------------------------------------------|
| Empirical formula                                      | C <sub>30</sub> H <sub>24</sub> ClN <sub>3</sub> O <sub>5</sub>  | C <sub>31</sub> H <sub>26</sub> ClN <sub>3</sub> O <sub>5</sub>  |
| Formula weight                                         | 541.97                                                           | 556.00                                                           |
| Temperature/K                                          | 296(2) K                                                         | 296(2) K                                                         |
| Wavelength/ Å                                          | 0.71073                                                          | 0.71073                                                          |
| Crystal system                                         | Monoclinic                                                       | Triclinic                                                        |
| Space group                                            | P2(1)/n                                                          | P-1                                                              |
| <i>a</i> / Å                                           | 9.4166(4)                                                        | 9.2939(12)                                                       |
| <i>b</i> / Å                                           | 11.3916(5)                                                       | 11.4737(17)                                                      |
| <i>c</i> / Å                                           | 24.6355(11)                                                      | 13.2237(18)                                                      |
| α (°)                                                  | 90                                                               | 78.635(5)                                                        |
| β (°)                                                  | 94.6982(15)                                                      | 87.607(4)                                                        |
| γ (°)                                                  | 90                                                               | 75.843(4)                                                        |
| <i>V</i> (Å <sup>3</sup> )                             | 2633.8(2)                                                        | 1340.4(3)                                                        |
| <i>Z</i>                                               | 4                                                                | 2                                                                |
| Calculated density (g·cm <sup>-3</sup> )               | 1.367                                                            | 1.378                                                            |
| Absorption coefficient (mm <sup>-1</sup> )             | 0.191                                                            | 0.190                                                            |
| <i>F</i> (000)                                         | 1128                                                             | 580                                                              |
| θ range / (°)                                          | 2.386 to 25.997                                                  | 2.260 to 25.998                                                  |
| Limiting indices                                       | -11<= <i>h</i> <=11, -14<= <i>k</i> <=12,<br>-28<= <i>l</i> <=30 | -11<= <i>h</i> <=11, -14<= <i>k</i> <=14,<br>-15<= <i>l</i> <=16 |
| Reflections collected/unique                           | 24775 / 5163                                                     | 19165 / 5253                                                     |
| Completeness to theta                                  | [ <i>R</i> (int) = 0.0409]<br>99.7 %                             | [ <i>R</i> (int) = 0.0345]<br>99.6 %                             |
| Max. and min. transmission                             | 0.7456 and 0.6850                                                | 0.7456 and 0.6846                                                |
| Refinement method                                      | Full-matrix<br>least-squares on <i>F</i> <sup>2</sup>            | Full-matrix<br>least-squares on <i>F</i> <sup>2</sup>            |
| Data/restraints/parameters                             | 5163 / 0 / 355                                                   | 5253 / 37 / 374                                                  |
| Goodness-of-fit on <i>F</i> <sup>2</sup>               | 1.019                                                            | 1.035                                                            |
| Final <i>R</i> indices [ <i>I</i> >2σ( <i>I</i> )]     | <i>R</i> 1 = 0.0435, w <i>R</i> 2 = 0.0942                       | <i>R</i> 1 = 0.0483, w <i>R</i> 2 = 0.1079                       |
| <i>R</i> indices (all data)                            | <i>R</i> 1 = 0.0808, w <i>R</i> 2 = 0.1101                       | <i>R</i> 1 = 0.0786, w <i>R</i> 2 = 0.1224                       |
| Largest diff. peak and hole<br>/(e · Å <sup>-3</sup> ) | 0.208 and -0.188                                                 | 0.200 and -0.337                                                 |

**Table S3** The single crystal data of compounds **4c'** and **5b'**

| Phase                                                  | <b>4c'</b>                                                       | <b>5b'</b>                                                     |
|--------------------------------------------------------|------------------------------------------------------------------|----------------------------------------------------------------|
| Empirical formula                                      | C <sub>29</sub> H <sub>21</sub> ClN <sub>4</sub> O <sub>3</sub>  | C <sub>32</sub> H <sub>26</sub> N <sub>4</sub> O <sub>5</sub>  |
| Formula weight                                         | 508.95                                                           | 546.57                                                         |
| Temperature/K                                          | 296(2) K                                                         | 296(2) K                                                       |
| Wavelength/ Å                                          | 0.71073                                                          | 0.71073                                                        |
| Crystal system                                         | Monoclinic                                                       | Triclinic                                                      |
| Space group                                            | P2(1)/c                                                          | P-1                                                            |
| <i>a</i> / Å                                           | 18.3989(11)                                                      | 9.0131(9)                                                      |
| <i>b</i> / Å                                           | 11.1620(7)                                                       | 10.5429(11)                                                    |
| <i>c</i> / Å                                           | 12.1197(7)                                                       | 14.4302(14)                                                    |
| α (°)                                                  | 90                                                               | 88.781(3)                                                      |
| β (°)                                                  | 95.609(2)                                                        | 86.492(3)                                                      |
| γ (°)                                                  | 90                                                               | 74.875(3)                                                      |
| <i>V</i> (Å <sup>3</sup> )                             | 2477.1(3)                                                        | 1321.2(2)                                                      |
| <i>Z</i>                                               | 4                                                                | 2                                                              |
| Calculated density (g·cm <sup>-3</sup> )               | 1.365                                                            | 1.374                                                          |
| Absorption coefficient (mm <sup>-1</sup> )             | 0.194                                                            | 0.095                                                          |
| <i>F</i> (000)                                         | 1056                                                             | 572                                                            |
| θ range / (°)                                          | 1.112 to 25.999                                                  | 2.345 to 25.998                                                |
| Limiting indices                                       | -22<= <i>h</i> <=22, -13<= <i>k</i> <=11,<br>-14<= <i>l</i> <=14 | -11<= <i>h</i> <=11, -12<= <i>k</i> <=13,<br>0<= <i>l</i> <=17 |
| Reflections collected/unique                           | 22796 / 4857<br>[R(int) = 0.0656]                                | 5066 / 5066<br>[R(int) = ?]                                    |
| Completeness to theta                                  | 99.6 %                                                           | 99.3 %                                                         |
| Max. and min. transmission                             | 0.7456 and 0.6653                                                | 0.7456 and 0.3662                                              |
| Refinement method                                      | Full-matrix<br>least-squares on F <sup>2</sup>                   | Full-matrix<br>least-squares on F <sup>2</sup>                 |
| Data/restraints/parameters                             | 4857 / 0 / 335                                                   | 5066 / 0 / 374                                                 |
| Goodness-of-fit on <i>F</i> <sup>2</sup>               | 1.013                                                            | 1.016                                                          |
| Final <i>R</i> indices [I>2σ(I)]                       | R1 = 0.0511, wR2 = 0.0954                                        | R1 = 0.0784, wR2 = 0.1841                                      |
| <i>R</i> indices (all data)                            | R1 = 0.1168, wR2 = 0.1164                                        | R1 = 0.1212, wR2 = 0.2125                                      |
| Largest diff. peak and hole<br>/(e · Å <sup>-3</sup> ) | 0.220 and -0.221                                                 | 0.258 and -0.304                                               |

**Table S4** The single crystal data of compounds **5e** and **5e'**

| Phase                                                  | <b>5e</b>                                                     | <b>5e'</b>                                                    |
|--------------------------------------------------------|---------------------------------------------------------------|---------------------------------------------------------------|
| Empirical formula                                      | C <sub>29</sub> H <sub>28</sub> N <sub>4</sub> O <sub>5</sub> | C <sub>29</sub> H <sub>28</sub> N <sub>4</sub> O <sub>5</sub> |
| Formula weight                                         | 512.55                                                        | 512.55                                                        |
| Temperature/K                                          | 296(2) K                                                      | 296(2) K                                                      |
| Wavelength/ Å                                          | 0.71073                                                       | 0.71073                                                       |
| Crystal system                                         | Monoclinic                                                    | Monoclinic                                                    |
| Space group                                            | P2(1)/c                                                       | P2(1)/c                                                       |
| <i>a</i> / Å                                           | 9.6086(10)                                                    | 11.1314(6)                                                    |
| <i>b</i> / Å                                           | 29.328(3)                                                     | 9.2504(5)                                                     |
| <i>c</i> / Å                                           | 9.6428(11)                                                    | 25.5543(16)                                                   |
| $\alpha$ (°)                                           | 90                                                            | 90                                                            |
| $\beta$ (°)                                            | 101.287(3)                                                    | 100.241(2)                                                    |
| $\gamma$ (°)                                           | 90                                                            | 90                                                            |
| <i>V</i> (Å <sup>3</sup> )                             | 2664.8(5)                                                     | 2589.4(3)                                                     |
| <i>Z</i>                                               | 4                                                             | 4                                                             |
| Calculated density (g·cm <sup>-3</sup> )               | 1.278                                                         | 1.315                                                         |
| Absorption coefficient (mm <sup>-1</sup> )             | 0.089                                                         | 0.091                                                         |
| <i>F</i> (000)                                         | 1080                                                          | 1080                                                          |
| $\theta$ range / (°)                                   | 2.563 to 25.992                                               | 2.238 to 25.000                                               |
| Limiting indices                                       | -11<= <i>h</i> <=10, -35<= <i>k</i> <=36,                     | -12<= <i>h</i> <=13, -10<= <i>k</i> <=11,                     |
|                                                        | -11<= <i>l</i> <=10                                           | -30<= <i>l</i> <=29                                           |
| Reflections collected/unique                           | 26172 / 5212                                                  | 24790 / 4546                                                  |
|                                                        | [ <i>R</i> (int) = 0.0634]                                    | [ <i>R</i> (int) = 0.0488]                                    |
| Completeness to theta                                  | 99.7 %                                                        | 99.8 %                                                        |
| Max. and min. transmission                             | 0.7456 and 0.6076                                             | 0.7456 and 0.6599                                             |
| Refinement method                                      | Full-matrix<br>least-squares on <i>F</i> <sup>2</sup>         | Full-matrix<br>least-squares on <i>F</i> <sup>2</sup>         |
| Data/restraints/parameters                             | 5212 / 0 / 347                                                | 4546 / 171 / 386                                              |
| Goodness-of-fit on <i>F</i> <sup>2</sup>               | 1.018                                                         | 1.062                                                         |
| Final <i>R</i> indices [ <i>I</i> >2σ( <i>I</i> )]     | <i>R</i> 1 = 0.0551, w <i>R</i> 2 = 0.1232                    | <i>R</i> 1 = 0.0704, w <i>R</i> 2 = 0.2111                    |
| <i>R</i> indices (all data)                            | <i>R</i> 1 = 0.1006, w <i>R</i> 2 = 0.1436                    | <i>R</i> 1 = 0.1178, w <i>R</i> 2 = 0.2351                    |
| Largest diff. peak and hole<br>/(e · Å <sup>-3</sup> ) | 0.205 and -0.203                                              | 0.565 and -0.513                                              |

## Experimental section

**1. General procedure for the reaction of MBH esters of isatins and  $\beta$ -enamino maleimides:** To a round flask was added MBH esters of isatins (0.20 mmol),  $\beta$ -enamino maleimides (0.40 mmol), DABCO (0.04 mmol) and acetonitrile (6.0 mL). The mixture was stirred at room temperature for about one hour. After removing the solvent by rotatory evaporation at reduced pressure, the residue was subjected to column chromatography with ethyl acetate and petroleum ether (V/V = 1:6) as eluent to give the pure products **3a-3m** and **3a'-3m'** for analysis.

### Methyl

**rel-(3R,3'R)-1-butyl-5-chloro-6'-methyl-2,5',7'-trioxo-1'-(p-tolyl)-1',2',3',5',6',7'-hexahydrospiro[indoline-3,4'-pyrrolo[3,4-b]pyridine]-3'-carboxylate (3a):** yellow solid, 47%, m.p. 210-212 °C; <sup>1</sup>H NMR (400 MHz, CDCl<sub>3</sub>)  $\delta$ : 7.29 (dd,  $J_1=8.4$  Hz,  $J_2=2.0$  Hz, 1H, ArH), 7.23 (d,  $J=8.0$  Hz, 2H, ArH), 7.16 (d,  $J=8.4$  Hz, 2H, ArH), 7.08 (d,  $J=2.0$  Hz, 1H, ArH), 6.86 (d,  $J=8.4$  Hz, 1H, ArH), 4.73 (t,  $J=12.0$  Hz, 1H, CH), 3.97 (dd,  $J_1=12.8$  Hz,  $J_2=3.6$  Hz, 1H, CH), 3.81 ~ 3.69 (m, 2H, CH), 3.52 (s, 3H, OCH<sub>3</sub>), 3.32 (dd,  $J_1=11.2$  Hz,  $J_2=3.6$  Hz, 1H, CH), 2.76 (s, 3H, CH<sub>3</sub>), 2.39 (s, 3H, CH<sub>3</sub>), 1.75 ~ 1.67 (m, 2H, CH), 1.49 ~ 1.39 (m, 2H, CH), 0.97 (t,  $J=7.2$  Hz, 3H, CH<sub>3</sub>); <sup>13</sup>C NMR (100 MHz, CDCl<sub>3</sub>)  $\delta$ : 175.8, 168.7, 167.0, 163.7, 145.0, 142.9, 140.1, 137.4, 131.3, 129.8, 128.8, 127.6, 125.0, 122.6, 110.0, 109.4, 101.4, 52.4, 51.0, 46.6, 45.9, 40.5, 29.2, 23.1, 21.1, 20.1, 13.7; IR (KBr)  $\nu$ : 2941, 2862, 1765, 1722, 1712, 1640, 1614, 1501, 1465, 1443, 1389, 1356, 1254, 1177, 1109, 1069, 1033, 976, 854, 791, 749 cm<sup>-1</sup>; HRMS (ESI) Calcd. for C<sub>28</sub>H<sub>28</sub>ClN<sub>3</sub>NaO<sub>5</sub> ([M+Na]<sup>+</sup>): 544.1610, Found: 544.1606.

### Methyl

**rel-(3S,3'R)-1-butyl-5-chloro-6'-methyl-2,5',7'-trioxo-1'-(p-tolyl)-1',2',3',5',6',7'-hexahydrospiro[indoline-3,4'-pyrrolo[3,4-b]pyridine]-3'-carboxylate (3a')**: yellow solid, 35%, m.p. 215-217 °C; <sup>1</sup>H NMR (400 MHz, CDCl<sub>3</sub>)  $\delta$ : 7.28 (d,  $J=8.8$  Hz, 1H, ArH), 7.23 (d,  $J=8.0$  Hz, 2H, ArH), 7.17 (d,  $J=8.0$  Hz, 2H, ArH), 7.12 (m, 1H, ArH), 6.85 (d,  $J=8.4$  Hz, 2H, ArH), 4.20 ~ 4.08 (m, 2H, CH), 3.81 (t,  $J=7.6$  Hz, 2H, CH), 3.59 (dd,  $J_1=11.2$  Hz,  $J_2=4.8$  Hz, 1H, CH), 3.36 (s, 3H, OCH<sub>3</sub>), 2.39 (s, 3H, CH<sub>3</sub>), 1.80 ~ 1.73 (m, 2H, CH), 1.56 ~ 1.46 (m, 2H, CH), 1.02 (t,  $J=7.6$  Hz, 3H, CH<sub>3</sub>); <sup>13</sup>C NMR (100 MHz, CDCl<sub>3</sub>)  $\delta$ : 175.7, 168.6, 167.4, 163.8, 144.8, 142.5, 139.9, 137.3, 131.1, 129.8, 129.1, 127.6, 124.7, 124.5, 109.5, 103.0, 52.0, 50.8, 47.0, 45.8, 40.7, 29.2, 23.2, 21.1, 20.2, 13.8; IR (KBr)  $\nu$ : 2944, 2859, 1767, 1732, 1702, 1655, 1613, 1462, 1435, 1373, 1340, 1254, 1160, 1088, 1051, 981, 846, 812, 788 cm<sup>-1</sup>; HRMS (ESI) Calcd. for C<sub>28</sub>H<sub>28</sub>ClN<sub>3</sub>NaO<sub>5</sub> ([M+Na]<sup>+</sup>):



544.1610, Found: 544.1619.

#### Methyl

***rel*-(3*R*,3'*R*)-1-butyl-5-chloro-6'-methyl-2,5',7'-trioxo-1'-phenyl-1',2',3',5',6',7'-hexahydrospiro[indoline-3,4'-pyrrolo[3,4-*b*]pyridine]-3'-carboxylate (3b)**: yellow solid, 51%, m.p. 244-246 °C; <sup>1</sup>H NMR (400 MHz, CDCl<sub>3</sub>) δ: 7.44 ~ 7.40 (m, 2H, ArH), 7.35 ~ 7.27 (m, 4H, ArH), 7.09 (s, 1H, ArH), 6.87 (d, *J* = 8.4 Hz, 1H, ArH), 4.76 (t, *J* = 12.0 Hz, 1H, CH), 4.01 (dd, *J*<sub>1</sub> = 12.8 Hz, *J*<sub>2</sub> = 3.6 Hz, 1H, CH), 3.81 ~ 3.70 (m, 2H, CH), 3.53 (s, 3H, OCH<sub>3</sub>), 3.33 (dd, *J*<sub>1</sub> = 11.6 Hz, *J*<sub>2</sub> = 3.6 Hz, 1H, CH), 2.76 (s, 3H, CH<sub>3</sub>), 1.75 ~ 1.68 (m, 2H, CH), 1.49 ~ 1.40 (m, 2H, CH), 0.97 (t, *J* = 7.6 Hz, 3H, CH<sub>3</sub>); <sup>13</sup>C NMR (100 MHz, CDCl<sub>3</sub>) δ: 175.7, 168.6, 166.9, 163.7, 144.8, 143.0, 142.6, 131.2, 129.2, 128.8, 127.6, 127.3, 125.1, 122.6, 109.5, 102.2, 52.5, 50.9, 46.6, 46.0, 40.5, 29.2, 23.2, 20.1, 13.7; IR (KBr) ν: 2946, 2853, 1763, 1730, 1706, 1645, 1600, 1511, 1470, 1437, 1388, 1360, 1255, 1176, 1104, 1076, 1030, 981, 857, 796, 759 cm<sup>-1</sup>; HRMS (ESI) Calcd. for C<sub>27</sub>H<sub>26</sub>ClN<sub>3</sub>NaO<sub>5</sub> ([M+Na]<sup>+</sup>): 530.1453, Found: 530.1451.

#### Methyl

***rel*-(3*S*,3'*R*)-1-butyl-5-chloro-6'-methyl-2,5',7'-trioxo-1'-phenyl-1',2',3',5',6',7'-hexahydrospiro[indoline-3,4'-pyrrolo[3,4-*b*]pyridine]-3'-carboxylate (3b')**: yellow solid, 32%, m.p. 266-267 °C; <sup>1</sup>H NMR (400 MHz, CDCl<sub>3</sub>) δ: 7.45 ~ 7.41 (m, 2H, ArH), 7.35 ~ 7.24 (m, 4H, ArH), 7.14 ~ 7.11 (m, 1H, ArH), 6.86 (d, *J* = 8.4 Hz, 1H, ArH), 4.23 ~ 4.10 (m, 2H, CH), 3.81 (t, *J* = 7.6 Hz, 2H, CH), 3.60 (dd, *J*<sub>1</sub> = 10.8 Hz, *J*<sub>2</sub> = 5.2 Hz, 1H, CH), 3.36 (s, 3H, OCH<sub>3</sub>), 2.80 (s, 3H, CH<sub>3</sub>), 1.79 ~ 1.73 (m, 2H, CH), 1.56 ~ 1.47 (m, 2H, CH), 1.02 (t, *J* = 7.2 Hz, 3H, CH<sub>3</sub>); <sup>13</sup>C NMR (100 MHz, CDCl<sub>3</sub>) δ: 175.6, 168.6, 167.3, 163.8, 144.6, 142.5, 142.4, 131.0, 129.2, 129.1, 127.6, 127.2, 124.8, 124.5, 109.5, 103.7, 52.0, 50.7, 47.1, 45.8, 40.7, 29.2, 23.3, 20.2, 13.8; IR (KBr) ν: 2942, 2854, 1764, 1726, 1702, 1644, 1609, 1521, 1476, 1428, 1402, 1368, 1264, 1176, 1110, 1075, 1031, 987, 862, 796, 764 cm<sup>-1</sup>; HRMS (ESI) Calcd. for C<sub>27</sub>H<sub>26</sub>ClN<sub>3</sub>NaO<sub>5</sub> ([M+Na]<sup>+</sup>): 530.1453, Found: 530.1449.

#### Methyl

***rel*-(3*R*,3'*R*)-1-butyl-5-chloro-1'-(4-methoxyphenyl)-6'-methyl-2,5',7'-trioxo-1',2',3',5',6',7'-hexahydrospiro[indoline-3,4'-pyrrolo[3,4-*b*]pyridine]-3'-carboxylate (3c)**: yellow solid, 48%, m.p. 219-221 °C; <sup>1</sup>H NMR (400 MHz, CDCl<sub>3</sub>) δ: 7.30 (dd, *J*<sub>1</sub> = 8.4 Hz, *J*<sub>2</sub> = 2.0 Hz, 1H, ArH), 7.23 ~ 7.19 (m, 2H, ArH), 7.08 (d, *J* = 2.0 Hz, 1H, ArH), 6.95 ~ 6.92 (m, 2H, ArH), 6.86 (d, *J* = 8.4 Hz, 1H, ArH), 4.71 (t, *J* = 12.0 Hz, 1H, CH), 3.94 (dd, *J*<sub>1</sub> = 12.8 Hz, *J*<sub>2</sub> = 4.0 Hz, 1H, CH), 3.84 (s, 3H,

OCH<sub>3</sub>), 3.77 ~ 3.71 (m, 2H, CH), 3.53 (s, 3H, CH<sub>3</sub>), 3.33 (dd,  $J_1=12.8$  Hz,  $J_2=3.6$  Hz, 1H, CH), 2.76 (s, 3H, CH<sub>3</sub>), 1.75 ~ 1.67 (m, 2H, CH), 1.49 ~ 1.39 (m, 2H, CH), 0.7 (t,  $J = 7.2$  Hz, 3H, CH<sub>3</sub>); <sup>13</sup>C NMR (100 MHz, CDCl<sub>3</sub>)  $\delta$ : 175.9, 168.7, 167.0, 163.8, 158.8, 145.2, 142.9, 135.5, 131.3, 128.8, 127.6, 126.6, 122.6, 114.4, 109.4, 100.5, 55.5, 52.4, 51.1, 46.6, 45.9, 40.5, 29.2, 23.1, 20.1, 13.7; IR (KBr)  $\nu$ : 2944, 2858, 1765, 1721, 1701, 1642, 1607, 1519, 1472, 1432, 1397, 1370, 1264, 1171, 1111, 1073, 1028, 984, 867, 799, 762 cm<sup>-1</sup>; HRMS (ESI) Calcd. for C<sub>28</sub>H<sub>28</sub>ClN<sub>3</sub>NaO<sub>6</sub> ([M+Na]<sup>+</sup>): 560.1559, Found: 560.1552.

#### Methyl

*rel-*

**(3*S*,3'*R*)-1-butyl-5-chloro-1'-(4-methoxyphenyl)-6'-methyl-2,5',7'-trioxo-1',2',3',5',6',7'-hexahydrospiro[indoline-3,4'-pyrrolo[3,4-*b*]pyridine]-3'-carboxylate(3c')**: yellow solid, 29%, m.p. 228-230 °C; <sup>1</sup>H NMR (400 MHz, CDCl<sub>3</sub>)  $\delta$ : 7.30 ~ 7.27 (m, 1H, ArH), 7.22 (d,  $J = 8.8$  Hz, 2H, ArH), 7.12 (d,  $J = 1.6$  Hz, 1H, ArH), 6.95 (d,  $J = 8.8$  Hz, 2H, ArH), 6.86 (d,  $J = 8.4$  Hz, 1H, ArH), 4.19 ~ 4.06 (m, 2H, CH), 3.84 (s, 3H, OCH<sub>3</sub>), 3.83 ~ 3.79 (m, 2H, CH), 3.61 (dd,  $J_1=11.6$  Hz,  $J_2=4.4$  Hz, 1H, CH), 3.36 (s, 3H, OCH<sub>3</sub>), 2.79 (s, 3H, CH<sub>3</sub>), 1.80 ~ 1.73 (m, 2H, CH), 1.56 ~ 1.47 (m, 2H, CH), 1.02 (t,  $J = 7.2$  Hz, 3H, CH<sub>3</sub>); <sup>13</sup>C NMR (100 MHz, CDCl<sub>3</sub>)  $\delta$ : 175.7, 168.6, 167.4, 163.9, 158.7, 144.9, 142.5, 135.3, 131.1, 129.1, 127.6, 126.3, 124.5, 114.4, 109.5, 102.2, 55.5, 52.0, 51.0, 47.0, 45.7, 40.7, 29.2, 23.2, 20.2, 13.8; IR (KBr)  $\nu$ : 2939, 2857, 1762, 1727, 1697, 1641, 1603, 1527, 1478, 1431, 1404, 1372, 1267, 1174, 1107, 1073, 1032, 988, 861, 798, 763 cm<sup>-1</sup>; HRMS (ESI) Calcd. for C<sub>28</sub>H<sub>28</sub>ClN<sub>3</sub>NaO<sub>6</sub> ([M+Na]<sup>+</sup>): 560.1559, Found: 560.1553.

#### Methyl

***rel*-(3*R*,3'*R*)-1-butyl-5-chloro-1'-(4-chlorophenyl)-6'-methyl-2,5',7'-trioxo-1',2',3',5',6',7'-hexahydrospiro[indoline-3,4'-pyrrolo[3,4-*b*]pyridine]-3'-carboxylate (3d)**: yellow solid, 57%, m.p. 223-225 °C; <sup>1</sup>H NMR (400 MHz, CDCl<sub>3</sub>)  $\delta$ : 7.39 (d,  $J = 8.4$  Hz, 2H, ArH), 7.30 (dd,  $J_1=8.4$  Hz,  $J_2=8.4$  Hz, 1H, ArH), 7.21 (d,  $J = 8.4$  Hz, 2H, ArH), 7.08 (d,  $J = 1.6$  Hz, 1H, ArH), 6.87 (d,  $J = 8.4$  Hz, 1H, ArH), 4.73 (t,  $J = 12.0$  Hz, 1H, CH), 3.96 (dd,  $J_1=12.8$  Hz,  $J_2=4.0$  Hz, 1H, CH), 3.81 ~ 3.69 (m, 2H, CH), 3.54 (s, 3H, OCH<sub>3</sub>), 3.32 (dd,  $J_1=11.6$  Hz,  $J_2=3.6$  Hz, 1H, CH), 2.77 (s, 3H, CH<sub>3</sub>), 1.75 ~ 1.67 (m, 2H, CH), 1.48 ~ 1.39 (m, 2H, CH), 0.97 (t,  $J = 7.2$  Hz, 3H, CH<sub>3</sub>); <sup>13</sup>C NMR (100 MHz, CDCl<sub>3</sub>)  $\delta$ : 175.6, 168.5, 166.8, 163.7, 144.5, 142.9, 141.0, 132.9, 131.0, 129.4, 128.9, 127.7, 126.3, 122.6, 109.5, 103.0, 52.5, 50.8, 46.5, 45.9, 40.5, 29.1, 23.2, 20.1, 13.7; IR (KBr)  $\nu$ : 2939, 2851, 1766, 1729, 1705, 1647, 1603, 1519, 1477, 1430, 1398, 1362, 1265, 1174, 1105, 1078, 1028, 984, 859, 792, 756 cm<sup>-1</sup>; HRMS (ESI) Calcd. for C<sub>27</sub>H<sub>25</sub>Cl<sub>2</sub>N<sub>3</sub>NaO<sub>5</sub> ([M+Na]<sup>+</sup>):

564.1063, Found: 564.1059.

#### Methyl

***rel*-(3*S*,3'*R*)-1-butyl-5-chloro-1'-(4-chlorophenyl)-6'-methyl-2,5',7'-trioxo-1',2',3',5',6',7'-hexahydrospiro[indoline-3,4'-pyrrolo[3,4-*b*]pyridine]-3'-carboxylate (3d')**: yellow solid, 30%, m.p. 225-227 °C; <sup>1</sup>H NMR (400 MHz, CDCl<sub>3</sub>) δ: 7.39 (d, *J* = 8.4 Hz, 2H, ArH), 7.29 (dd, *J*<sub>1</sub> = 8.0 Hz, *J*<sub>2</sub> = 7.2 Hz, 1H, ArH), 7.22 (d, *J* = 8.4 Hz, 2H, ArH), 7.16~ 7.14(m, 1H, ArH), 6.86 (d, *J* = 8.4 Hz, 1H, ArH), 4.20~ 4.08 (m, 2H, CH), 3.80 (t, *J* = 7.6 Hz, 2H, CH), 3.58 (dd, *J*<sub>1</sub> = 11.2 Hz, *J*<sub>2</sub> = 3.2 Hz, 1H, CH), 3.37 (s, 3H, OCH<sub>3</sub>), 2.80 (s, 3H, CH<sub>3</sub>), 1.79 ~ 1.72 (m, 2H, CH), 1.55 ~ 1.46 (m, 2H, CH), 1.02 (t, *J* = 7.2 Hz, 3H, CH<sub>3</sub>); <sup>13</sup>C NMR (100 MHz, CDCl<sub>3</sub>) δ: 175.5, 168.4, 167.1, 163.8, 144.2, 142.5, 140.9, 132.8, 130.7, 129.34, 129.2, 127.7, 126.0, 124.5, 109.6, 104.5, 52.1, 50.7, 47.0, 45.7, 40.7, 29.1, 23.3, 20.2, 13.8; IR (KBr) ν: 2947, 2852, 1767, 1735, 1701, 1642, 1605, 1518, 1474, 1425, 1403, 1369, 1266, 1173, 1107, 1068, 1034, 983, 865, 794, 758 cm<sup>-1</sup>; HRMS (ESI) Calcd. for C<sub>27</sub>H<sub>25</sub>Cl<sub>2</sub>N<sub>3</sub>NaO<sub>5</sub> ([M+Na]<sup>+</sup>): 564.1063, Found: 564.1062.

#### Methyl

***rel*-(3*R*,3'*R*)-1-benzyl-6'-methyl-2,5',7'-trioxo-1'-phenyl-1',2',3',5',6',7'-hexahydrospiro[indoline-3,4'-pyrrolo[3,4-*b*]pyridine]-3'-carboxylate (3e)**: yellow solid, 27%, m.p. 203-205 °C; <sup>1</sup>H NMR (400 MHz, CDCl<sub>3</sub>) δ: 7.45 ~ 7.41 (m, 4H, ArH), 7.36 ~ 7.31 (m, 4H, ArH), 7.29 (s, 1H, ArH), 7.26 ~ 7.21 (m, 2H, ArH), 7.13 (d, *J* = 7.2 Hz, 1H, ArH), 7.06 ~ 7.02 (m, 1H, ArH), 6.77 (d, *J* = 8.0 Hz, 1H, ArH), 5.06 ~ 4.98 (m, 2H, CH), 4.82 (t, *J* = 12.0 Hz, 1H, CH), 4.02 (dd, *J*<sub>1</sub> = 12.8 Hz, *J*<sub>2</sub> = 3.6 Hz, 1H, CH), 3.44 (s, 3H, OCH<sub>3</sub>), 3.40 (dd, *J*<sub>1</sub> = 11.6 Hz, *J*<sub>2</sub> = 3.6 Hz, 1H, CH), 2.78 (s, 3H, CH<sub>3</sub>); <sup>13</sup>C NMR (100 MHz, CDCl<sub>3</sub>) δ: 176.3, 169.0, 167.1, 163.9, 144.9, 143.9, 142.7, 135.6, 129.2, 129.1, 128.9, 128.7, 127.4, 127.3, 127.2, 125.1, 122.7, 122.0, 109.6, 102.8, 52.4, 51.0, 46.7, 46.1, 44.5, 23.2; IR (KBr) ν: 2958, 2849, 1766, 1731, 1711, 1647, 1596, 1511, 1463, 1442, 1392, 1350, 1254, 1176, 1103, 1078, 1030, 979, 843, 799, 763 cm<sup>-1</sup>; HRMS (ESI) Calcd. for C<sub>30</sub>H<sub>26</sub>N<sub>3</sub>O<sub>5</sub> ([M+H]<sup>+</sup>): 508.1867, Found: 508.1885.

#### Methyl

***rel*-(3*S*,3'*R*)-1-benzyl-6'-methyl-2,5',7'-trioxo-1'-phenyl-1',2',3',5',6',7'-hexahydrospiro[indoline-3,4'-pyrrolo[3,4-*b*]pyridine]-3'-carboxylate (3e')**: yellow solid, 40%, m.p. 135-137 °C; <sup>1</sup>H NMR (400 MHz, CDCl<sub>3</sub>) δ: 7.56 (d, *J* = 7.6 Hz, 2H, ArH), 7.45 ~ 7.41 (m, 2H, ArH), 7.40 ~ 7.36 (m, 2H, ArH), 7.34 ~ 7.29 (m, 4H, ArH), 7.22 ~ 7.17 (m, 2H, ArH), 7.02 (t, *J* = 7.6 Hz, 1H, ArH), 6.79 (d, *J* = 8.0 Hz, 1H, ArH), 5.09 (d, *J* = 15.6 Hz, 1H, CH), 5.03 (d, *J* = 15.6 Hz, 1H, CH), 4.30

~ 4.23 (m, 1H, CH), 4.14 (dd,  $J_1 = 13.6$  Hz,  $J_2 = 4.4$  Hz, 1H, CH), 3.67 (dd,  $J_1 = 11.6$  Hz,  $J_2 = 4.0$  Hz, 1H, CH), 3.13 (s, 3H, OCH<sub>3</sub>), 2.82 (s, 3H, CH<sub>3</sub>); <sup>13</sup>C NMR (100 MHz, CDCl<sub>3</sub>) δ: 176.5, 168.9, 167.5, 164.1, 144.5, 143.5, 142.6, 135.7, 129.2, 129.1, 128.7, 127.8, 127.6, 127.1, 124.8, 123.9, 122.7, 109.5, 104.6, 51.9, 50.9, 47.2, 46.0, 44.9, 23.3; IR (KBr) ν: 2956, 2866, 1749, 1735, 1700, 1640, 1608, 1512, 1464, 1432, 1376, 1349, 1248, 1178, 1097, 1065, 1033, 982, 847, 804, 761 cm<sup>-1</sup>; HRMS (ESI) Calcd. for C<sub>30</sub>H<sub>26</sub>N<sub>3</sub>O<sub>5</sub> ([M+H]<sup>+</sup>): 508.1867, Found: 508.1887.

#### Methyl

***rel*-(3*R*,3'*R*)-1-benzyl-6'-methyl-2,5',7'-trioxo-1'-(*p*-tolyl)-1',2',3',5',6',7'-hexahydrospiro[indoline-3,4'-pyrrolo[3,4-*b*]pyridine]-3'-carboxylate (3f)**: yellow solid, 23%, m.p. 218-220 °C; <sup>1</sup>H NMR (400 MHz, CDCl<sub>3</sub>) δ: 7.44 (d,  $J = 7.6$  Hz, 2H, ArH), 7.35 (t,  $J = 7.6$  Hz, 2H, ArH), 7.28 ~ 7.26 (m, 1H, ArH), 7.24 ~ 7.18 (m, 5H, ArH), 7.13 (d,  $J = 7.2$  Hz, 1H, ArH), 7.06 ~ 7.02 (m, 1H, ArH), 6.77 (d,  $J = 8.0$  Hz, 1H, ArH), 5.02 (s, 2H, CH), 4.79 (t,  $J = 12.0$  Hz, 1H, CH), 3.99 (dd,  $J_1 = 12.8$  Hz,  $J_2 = 4.0$  Hz, 1H, CH), 3.44 (s, 3H, OCH<sub>3</sub>), 3.40 (dd,  $J_1 = 11.6$  Hz,  $J_2 = 3.6$  Hz, 1H, CH), 2.78 (s, 3H, CH<sub>3</sub>), 2.39 (s, 3H, CH<sub>3</sub>); <sup>13</sup>C NMR (100 MHz, CDCl<sub>3</sub>) δ: 176.4, 169.0, 167.1, 163.9, 145.1, 143.9, 140.2, 137.3, 135.7, 129.8, 129.2, 128.9, 128.7, 127.4, 127.3, 125.1, 122.7, 122.0, 109.5, 102.0, 52.3, 51.1, 46.7, 46.1, 44.4, 23.2, 21.1; IR (KBr) ν: 2943, 2855, 1751, 1723, 1701, 1644, 1604, 1511, 1464, 1429, 1375, 1356, 1260, 1171, 1111, 1072, 1033, 979, 837, 789, 753 cm<sup>-1</sup>; HRMS (ESI) Calcd. for C<sub>31</sub>H<sub>27</sub>N<sub>3</sub>NaO<sub>5</sub> ([M+Na]<sup>+</sup>): 544.1843, Found: 544.1835.

#### Methyl

***rel*-(3*S*,3'*R*)-1-benzyl-6'-methyl-2,5',7'-trioxo-1'-(*p*-tolyl)-1',2',3',5',6',7'-hexahydrospiro[indoline-3,4'-pyrrolo[3,4-*b*]pyridine]-3'-carboxylate (3f')**: yellow solid, 36%, m.p. 177-179 °C; <sup>1</sup>H NMR (400 MHz, CDCl<sub>3</sub>) δ: 7.57 (d,  $J = 7.6$  Hz, 2H, ArH), 7.38 (t,  $J = 7.2$  Hz, 2H, ArH), 7.32 ~ 7.28 (m, 1H, ArH), 7.24 ~ 7.17 (m, 6H, ArH), 7.03 ~ 6.99 (m, 1H, ArH), 6.79 (d,  $J = 8.0$  Hz, 1H, ArH), 5.09 (d,  $J = 15.6$  Hz, 1H, CH), 5.03 (d,  $J = 15.6$  Hz, 1H, CH), 4.27 ~ 4.21 (m, 1H, CH), 4.10 (dd,  $J_1 = 13.6$  Hz,  $J_2 = 4.0$  Hz, 1H, CH), 3.66 (dd,  $J_1 = 11.6$  Hz,  $J_2 = 4.0$  Hz, 1H, CH), 3.13 (s, 3H, OCH<sub>3</sub>), 2.81 (s, 3H, CH<sub>3</sub>), 2.39 (s, 3H, CH<sub>3</sub>); <sup>13</sup>C NMR (100 MHz, CDCl<sub>3</sub>) δ: 176.6, 168.9, 167.5, 164.1, 144.7, 143.5, 140.1, 137.2, 135.7, 129.8, 129.1, 128.7, 127.8, 127.6, 124.7, 123.9, 122.7, 109.5, 103.7, 51.9, 50.9, 47.1, 45.9, 44.9, 23.3, 21.1; IR (KBr) ν: 2949, 2842, 1756, 1721, 1710, 1638, 1611, 1507, 1465, 1430, 1385, 1340, 1262, 1166, 1103, 1064, 1040, 992, 855, 793, 762 cm<sup>-1</sup>; HRMS (ESI) Calcd. for C<sub>31</sub>H<sub>28</sub>N<sub>3</sub>O<sub>5</sub> ([M+H]<sup>+</sup>): 544.1843, Found: 544.1829.

#### Methyl

***rel*-(3*R*,3'*R*)-1-benzyl-1'-(4-methoxyphenyl)-6'-methyl-2,5',7'-trioxo-1',2',3',5',6',7'-hexahydrospiro[indoline-3,4'-pyrrolo[3,4-*b*]pyridine]-3'-carboxylate (3g):** yellow solid, 28%, m.p. 167-169 °C; <sup>1</sup>H NMR (400 MHz, CDCl<sub>3</sub>) δ: 7.43 (d, *J* = 7.6 Hz, 2H, ArH), 7.34 (t, *J* = 7.2 Hz, 2H, ArH), 7.28 ~ 7.26 (m, 1H, ArH), 7.24 ~ 7.20 (m, 3H, ArH), 7.13 (d, *J* = 6.8 Hz, 1H, ArH), 7.06 ~ 7.02 (m, 1H, ArH), 6.94 (d, *J* = 8.8 Hz, 2H, ArH), 6.76 (d, *J* = 7.6 Hz, 1H, ArH), 5.02 (s, 2H, CH), 4.77 (t, *J* = 11.6 Hz, 1H, CH), 3.95 (dd, *J*<sub>1</sub> = 12.8 Hz, *J*<sub>2</sub> = 4.0 Hz, 1H, CH), 3.84 (s, 3H, OCH<sub>3</sub>), 3.44 (s, 3H, OCH<sub>3</sub>), 3.42 ~ 3.38 (m, 1H, CH), 2.77 (s, 3H, CH<sub>3</sub>); <sup>13</sup>C NMR (100 MHz, CDCl<sub>3</sub>) δ: 176.4, 169.0, 167.1, 164.0, 158.7, 145.3, 143.8, 135.7, 135.6, 129.2, 128.9, 128.7, 127.4, 127.3, 126.7, 122.7, 122.0, 114.4, 109.5, 101.1, 55.5, 52.3, 51.2, 46.7, 46.0, 44.4, 23.1; IR (KBr) ν: 2941, 2851, 1761, 1728, 1707, 1642, 1606, 1509, 1460, 1483, 1384, 1355, 1251, 1173, 1104, 1072, 1029, 990, 850, 807, 757 cm<sup>-1</sup>; HRMS (ESI) Calcd. for C<sub>31</sub>H<sub>28</sub>N<sub>3</sub>O<sub>6</sub> ([M+H]<sup>+</sup>): 538.1973, Found: 538.1989.

#### Methyl

***rel*-(3*S*,3'*R*)-1-benzyl-1'-(4-methoxyphenyl)-6'-methyl-2,5',7'-trioxo-1',2',3',5',6',7'-hexahydrospiro[indoline-3,4'-pyrrolo[3,4-*b*]pyridine]-3'-carboxylate (3g')**: yellow solid, 34%, m.p. 193-195 °C; <sup>1</sup>H NMR (400 MHz, CDCl<sub>3</sub>) δ: 7.57 (d, *J* = 7.2 Hz, 2H, ArH), 7.38 (t, *J* = 7.2 Hz, 2H, ArH), 7.31 ~ 7.28 (m, 1H, ArH), 7.24 ~ 7.17 (m, 4H, ArH), 7.02 ~ 6.99 (m, 1H, ArH), 6.96 ~ 6.93 (m, 2H, ArH), 6.78 (d, *J* = 7.6 Hz, 1H, ArH), 5.09 (d, *J* = 15.6 Hz, 1H, CH), 5.03 (d, *J* = 15.6 Hz, 1H, CH), 4.23 (t, *J* = 12.4 Hz, 1H, CH), 4.06 (dd, *J*<sub>1</sub> = 14.0 Hz, *J*<sub>2</sub> = 4.4 Hz, 1H, CH), 3.84 (s, 3H, OCH<sub>3</sub>), 3.66 (dd, *J*<sub>1</sub> = 12.0 Hz, *J*<sub>2</sub> = 4.0 Hz, 1H, CH), 3.14 (s, 3H, OCH<sub>3</sub>), 2.81 (s, 3H, CH<sub>3</sub>); <sup>13</sup>C NMR (100 MHz, CDCl<sub>3</sub>) δ: 176.6, 168.9, 167.5, 164.1, 158.6, 144.8, 143.5, 135.7, 135.5, 129.2, 129.1, 128.7, 127.8, 127.6, 126.3, 123.9, 122.7, 114.4, 109.5, 103.0, 55.5, 51.8, 51.1, 47.1, 45.9, 44.9, 23.2; IR (KBr) ν: 2961, 2842, 1756, 1721, 1710, 1638, 1611, 1507, 1465, 1430, 1385, 1350, 1262, 1166, 1103, 1064, 1040, 992, 855, 793, 762 cm<sup>-1</sup>; HRMS (ESI) Calcd. for C<sub>31</sub>H<sub>28</sub>N<sub>3</sub>O<sub>6</sub> ([M+H]<sup>+</sup>): 538.1973, Found: 538.1986.

#### Methyl

***rel*-(3*R*,3'*R*)-1-benzyl-1'-(4-chlorophenyl)-6'-methyl-2,5',7'-trioxo-1',2',3',5',6',7'-hexahydrospiro[indoline-3,4'-pyrrolo[3,4-*b*]pyridine]-3'-carboxylate (3h):** yellow solid, 25%, m.p. 214-216 °C; <sup>1</sup>H NMR (400 MHz, CDCl<sub>3</sub>) δ: 7.44 ~ 7.33 (m, 6H, ArH), 7.29 ~ 7.27 (m, 1H, ArH), 7.25 ~ 7.22 (m, 3H, ArH), 7.12 (d, *J* = 6.8 Hz, 1H, ArH), 7.07 ~ 7.03 (m, 1H, ArH), 6.78 (d, *J* = 8.0 Hz, 1H, ArH), 5.04 (d, *J* = 16.0 Hz, 1H, CH), 5.00 (d, *J* = 15.2 Hz, 1H, CH), 4.79 (t, *J* = 12.0

Hz, CH), 4.98 (dd,  $J_1 = 12.4$  Hz,  $J_2 = 3.6$  Hz, 1H, CH), 3.45 (s, 3H, OCH<sub>3</sub>), 3.39 (dd,  $J_1 = 11.6$  Hz,  $J_2 = 4.0$  Hz, 1H, CH), 2.79 (s, 3H, CH<sub>3</sub>); <sup>13</sup>C NMR (100 MHz, CDCl<sub>3</sub>) δ: 176.2, 168.8, 167.0, 163.9, 144.5, 143.9, 141.2, 135.6, 132.8, 129.4, 129.0, 128.9, 128.7, 127.5, 127.3, 126.4, 122.8, 122.0, 109.6, 103.5, 52.4, 50.9, 46.6, 46.1, 44.5, 23.2; IR (KBr) ν: 2952, 2855, 1762, 1724, 1709, 1642, 1609, 1497, 1455, 1420, 1388, 1353, 1247, 1187, 1116, 1083, 1033, 996, 858, 803, 764 cm<sup>-1</sup>; HRMS (ESI) Calcd. for C<sub>30</sub>H<sub>24</sub>ClN<sub>3</sub>NaO<sub>5</sub> ([M+Na]<sup>+</sup>): 564.1297, Found: 564.1314.

#### Methyl

***rel*-(3*S*,3'*R*)-1-benzyl-1'-(4-chlorophenyl)-6'-methyl-2,5',7'-trioxo-1',2',3',5',6',7'-hexahydros piro[indoline-3,4'-pyrrolo[3,4-*b*]pyridine]-3'-carboxylate (3h')**: yellow solid, 37%, m.p. 201-203 °C; <sup>1</sup>H NMR (400 MHz, CDCl<sub>3</sub>) δ: 7.56 (d,  $J = 7.2$  Hz, 2H, ArH), 7.40 ~ 7.36 (m, 4H, ArH), 7.32 ~ 7.28 (m, 1H, ArH), 7.25 ~ 7.16 (m, 4H, ArH), 7.03 ~ 6.99 (m, 1H, ArH), 6.80 (d,  $J = 7.6$  Hz, 1H, ArH), 5.08 (d,  $J = 16.0$  Hz, 1H, CH), 5.03 (d,  $J = 15.6$  Hz, 1H, CH), 4.27 ~ 4.20 (m, 1H, CH), 4.09 (dd,  $J_1 = 13.6$  Hz,  $J_2 = 4.4$  Hz, 1H, CH), 3.65 (dd,  $J_1 = 12.0$  Hz,  $J_2 = 4.4$  Hz, 1H, CH), 3.13 (s, 3H, OCH<sub>3</sub>), 2.82 (s, 3H, CH<sub>3</sub>); <sup>13</sup>C NMR (100 MHz, CDCl<sub>3</sub>) δ: 176.3, 168.8, 167.3, 164.0, 144.1, 143.5, 141.0, 135.6, 132.6, 129.3, 129.3, 128.8, 128.8, 127.8, 127.7, 126.0, 123.9, 122.8, 109.6, 105.4, 51.9, 50.8, 47.1, 45.9, 44.9, 23.3; IR (KBr) ν: 2938, 2859, 1766, 1725, 1698, 1634, 1607, 1510, 1462, 1437, 1386, 1359, 1252, 1179, 1110, 1074, 1030, 991, 852, 791, 767 cm<sup>-1</sup>; HRMS (ESI) Calcd. for C<sub>30</sub>H<sub>24</sub>ClN<sub>3</sub>NaO<sub>5</sub> ([M+Na]<sup>+</sup>): 564.1297, Found: 564.1297.

#### Methyl

***rel*-(3*R*,3'*R*)-1-benzyl-5,6'-dimethyl-2,5',7'-trioxo-1'-(*p*-tolyl)-1',2',3',5',6',7'-hexahydrospiro[*i*ndoline-3,4'-pyrrolo[3,4-*b*]pyridine]-3'-carboxylate (3i)**: yellow solid, 35%, m.p. 236-238 °C; <sup>1</sup>H NMR (400 MHz, CDCl<sub>3</sub>) δ: 7.43 (d,  $J = 6.8$  Hz, 2H, ArH), 7.36 ~ 7.27 (m, 3H, ArH), 7.24 ~ 7.17 (m, 4H, ArH), 7.01 (d,  $J = 8.0$  Hz, 1H, ArH), 6.93 (s, 1H, ArH), 6.64 (d,  $J = 7.6$  Hz, 1H, ArH), 5.03 (d,  $J = 16.0$  Hz, 1H, CH), 4.97 (d,  $J = 15.6$  Hz, 1H, CH), 4.81 ~ 4.75 (m, 1H, CH), 4.98 (dd,  $J_1 = 12.8$  Hz,  $J_2 = 4.0$  Hz, 1H, CH), 3.46 (s, 3H, OCH<sub>3</sub>), 3.37 (dd,  $J_1 = 11.6$  Hz,  $J_2 = 3.6$  Hz, 1H, CH), 2.78 (s, 3H, CH<sub>3</sub>), 2.39 (s, 3H, CH<sub>3</sub>), 2.29 (s, 3H, CH<sub>3</sub>); <sup>13</sup>C NMR (100 MHz, CDCl<sub>3</sub>) δ: 176.4, 169.0, 167.1, 164.0, 145.0, 141.5, 140.3, 137.2, 135.8, 132.1, 129.8, 129.2, 128.7, 127.4, 127.3, 125.0, 122.8, 109.2, 102.4, 52.4, 51.2, 46.8, 46.1, 44.4, 23.2, 21.2, 21.1; IR (KBr) ν: 2947, 2860, 1746, 1731, 1712, 1650, 1600, 1509, 1444, 1411, 1373, 1358, 1255, 1182, 1117, 1084, 1043, 984, 836, 779, 753 cm<sup>-1</sup>; HRMS (ESI) Calcd. for C<sub>32</sub>H<sub>30</sub>N<sub>3</sub>O<sub>5</sub> ([M+H]<sup>+</sup>): 536.2180, Found: 536.2195.

### Methyl

***rel*-(3*S*,3'*R*)-1-benzyl-5,6'-dimethyl-2,5',7'-trioxo-1'-(*p*-tolyl)-1',2',3',5',6',7'-hexahydrospiro[indoline-3,4'-pyrrolo[3,4-*b*]pyridine]-3'-carboxylate (3i')**: yellow solid, 47%, m.p. 226-228 °C; <sup>1</sup>H NMR (400 MHz, CDCl<sub>3</sub>) δ: 7.55 (d, *J* = 7.6 Hz, 2H, ArH), 7.39 ~ 7.35 (m, 2H, ArH), 7.30 ~ 7.27 (m, 1H, ArH), 7.24 ~ 7.18 (m, 4H, ArH), 6.98 (d, *J* = 10.4 Hz, 1H, ArH), 6.66 (d, *J* = 8.0 Hz, 1H, ArH), 5.06 (d, *J* = 15.6 Hz, 1H, CH), 5.00 (d, *J* = 15.6 Hz, 1H, CH), 4.28 ~ 4.21 (m, 1H, CH), 4.09 (dd, *J*<sub>1</sub> = 13.6 Hz, *J*<sub>2</sub> = 4.4 Hz, 1H, CH), 3.64 (dd, *J*<sub>1</sub> = 12.0 Hz, *J*<sub>2</sub> = 4.0 Hz, 1H, CH), 3.15 (s, 3H, OCH<sub>3</sub>), 2.81 (s, 3H, CH<sub>3</sub>), 2.39 (s, 3H, CH<sub>3</sub>), 2.28 (s, 3H, CH<sub>3</sub>); <sup>13</sup>C NMR (100 MHz, CDCl<sub>3</sub>) δ: 176.5, 169.0, 167.5, 164.2, 144.6, 141.1, 140.2, 137.1, 135.9, 132.1, 129.8, 129.5, 129.2, 128.7, 127.8, 127.6, 124.8, 124.7, 109.2, 104.1, 51.8, 50.9, 47.2, 45.9, 44.9, 23.3, 21.2, 21.1; IR (KBr) ν: 2952, 2867, 1759, 1736, 1700, 1649, 1609, 1513, 1468, 1443, 1387, 1350, 1251, 1184, 1105, 1066, 1021, 998, 843, 784, 766 cm<sup>-1</sup>; HRMS (ESI) Calcd. for C<sub>32</sub>H<sub>30</sub>N<sub>3</sub>O<sub>5</sub> ([M+H]<sup>+</sup>): 536.2180, Found: 536.2197.

### Methyl

***rel*-(3*R*,3'*R*)-1-benzyl-1'-(4-methoxyphenyl)-5,6'-dimethyl-2,5',7'-trioxo-1',2',3',5',6',7'-hexahydrospiro[indoline-3,4'-pyrrolo[3,4-*b*]pyridine]-3'-carboxylate (3j)**: yellow solid, 30%, m.p. 217-219 °C; <sup>1</sup>H NMR (400 MHz, CDCl<sub>3</sub>) δ: 7.43 (d, *J* = 7.6 Hz, 2H, ArH), 7.35 ~ 7.32 (m, 2H, ArH), 7.27 ~ 7.22 (m, 3H, ArH), 7.00 (d, *J* = 7.6 Hz, 1H, ArH), 6.96 ~ 6.95 (m, 1H, ArH), 6.93 (m, 2H, ArH), 6.64 (d, *J* = 8.0 Hz, 1H, ArH), 5.02 (d, *J* = 16.0 Hz, 1H, CH), 4.97 (d, *J* = 16.0 Hz, 1H, CH), 4.76 (t, *J*<sub>1</sub> = 12.0 Hz, 1H, CH), 3.95 (dd, *J*<sub>1</sub> = 12.8 Hz, *J*<sub>2</sub> = 4.0 Hz, 1H, CH), 3.84 (s, 3H, OCH<sub>3</sub>), 3.45 (s, 3H, OCH<sub>3</sub>), 3.38 (dd, *J*<sub>1</sub> = 11.6 Hz, *J*<sub>2</sub> = 4.0 Hz, 1H, CH), 2.78 (s, 3H, CH<sub>3</sub>), 2.29 (s, 3H, CH<sub>3</sub>); <sup>13</sup>C NMR (100 MHz, CDCl<sub>3</sub>) δ: 176.4, 169.1, 167.1, 164.1, 158.7, 145.2, 141.5, 135.8, 135.7, 132.1, 129.2, 128.7, 127.4, 127.3, 126.6, 122.9, 114.4, 109.2, 101.6, 55.5, 52.4, 51.3, 46.8, 46.1, 44.4, 23.2, 21.3; IR (KBr) ν: 2944, 2862, 1765, 1720, 1694, 1633, 1601, 1517, 1469, 1433, 1391, 1362, 1255, 1176, 1102, 1077, 1028, 993, 847, 796, 771 cm<sup>-1</sup>; HRMS (ESI) Calcd. for C<sub>32</sub>H<sub>30</sub>N<sub>3</sub>O<sub>6</sub> ([M+H]<sup>+</sup>): 552.2129, Found: 552.2143.

### Methyl

***rel*-(3*S*,3'*R*)-1-benzyl-1'-(4-methoxyphenyl)-5,6'-dimethyl-2,5',7'-trioxo-1',2',3',5',6',7'-hexahydrospiro[indoline-3,4'-pyrrolo[3,4-*b*]pyridine]-3'-carboxylate (3j')**: yellow solid, 45%, m.p. 232-234 °C; <sup>1</sup>H NMR (400 MHz, CDCl<sub>3</sub>) δ: 7.55 (d, *J* = 7.6 Hz, 2H, ArH), 7.39 ~ 7.35 (m, 2H, ArH), 7.30 ~ 7.27 (m, 1H, ArH), 7.25 ~ 7.22 (m, 2H, ArH), 6.99 ~ 6.94 (m, 4H, ArH), 6.66 (d, *J* =

8.0 Hz, 1H, ArH), 5.07 (d,  $J = 15.6$  Hz, 1H, CH), 5.00 (d,  $J = 15.6$  Hz, 1H, CH), 4.27 ~ 4.20 (m, 1H, CH), 4.06 (dd,  $J_1 = 13.6$  Hz,  $J_2 = 4.4$  Hz, 1H, CH), 3.84 (s, 3H, OCH<sub>3</sub>), 3.65 (dd,  $J_1 = 12.0$  Hz,  $J_2 = 4.0$  Hz, 1H, CH), 3.15 (s, 3H, OCH<sub>3</sub>), 2.81 (s, 3H, CH<sub>3</sub>), 2.28 (s, 3H, CH<sub>3</sub>); <sup>13</sup>C NMR (100 MHz, CDCl<sub>3</sub>)  $\delta$ : 176.5, 169.0, 167.5, 164.2, 158.6, 144.7, 141.1, 135.9, 135.6, 132.1, 129.5, 129.2, 128.7, 127.8, 127.6, 126.3, 124.8, 114.4, 109.2, 103.3, 55.5, 51.8, 51.1, 47.2, 45.9, 44.9, 23.2, 21.2; IR (KBr)  $\nu$ : 2947, 2868, 1759, 1729, 1701, 1640, 1606, 1520, 1476, 1435, 1399, 1367, 1259, 1186, 1109, 1071, 1034, 989, 856, 799, 771 cm<sup>-1</sup>; HRMS (ESI) Calcd. for C<sub>32</sub>H<sub>30</sub>N<sub>3</sub>O<sub>6</sub> ([M+H]<sup>+</sup>): 552.2129, Found: 552.2141.

#### Methyl

***rel*-(3*R*,3'*R*)-1-benzyl-5-chloro-6'-methyl-2,5',7'-trioxo-1'-phenyl-1',2',3',5',6',7'-hexahydrospiro[indoline-3,4'-pyrrolo[3,4-*b*]pyridine]-3'-carboxylate (3k)**: yellow solid, 53%, m.p. 208-210 °C; <sup>1</sup>H NMR (400 MHz, CDCl<sub>3</sub>)  $\delta$ : 7.45 ~ 7.41 (m, 4H, ArH), 7.36 ~ 7.35 (m, 3H, ArH), 7.30 ~ 7.28 (m, 3H, ArH), 7.17 (d,  $J = 8.0$  Hz, 1H, ArH), 7.10 (s, 1H, ArH), 6.66 (d,  $J = 8.4$  Hz, 1H, ArH), 5.04 (d,  $J = 15.6$  Hz, 1H, CH), 4.97 (d,  $J = 16.4$  Hz, 1H, CH), 4.80 (t,  $J = 11.6$  Hz, 1H, CH), 4.04 (d,  $J = 12.4$  Hz, 1H, CH), 3.49 (s, 3H, OCH<sub>3</sub>), 3.38 (s, 3H, OCH<sub>3</sub>), 3.38 (d,  $J = 10.8$  Hz, 1H, CH), 2.80 (s, 3H, CH<sub>3</sub>); <sup>13</sup>C NMR (100 MHz, CDCl<sub>3</sub>)  $\delta$ : 176.0, 168.7, 167.0, 163.7, 144.9, 142.6, 142.5, 135.2, 131.1, 129.2, 128.8, 128.8, 128.0, 127.6, 127.4, 127.2, 125.1, 122.5, 110.4, 102.1, 52.5, 51.0, 46.7, 46.1, 44.6, 23.2; IR (KBr)  $\nu$ : 2955, 2847, 1755, 1722, 1709, 1637, 1610, 1518, 1465, 1433, 1377, 1349, 1262, 1175, 1109, 1072, 1033, 977, 842, 788, 754 cm<sup>-1</sup>; HRMS (ESI) Calcd. for C<sub>30</sub>H<sub>25</sub>ClN<sub>3</sub>O<sub>5</sub> ([M+H]<sup>+</sup>): 542.1477, Found: 542.1493.

#### Methyl

***rel*-(3*S*,3'*R*)-1-benzyl-5-chloro-6'-methyl-2,5',7'-trioxo-1'-phenyl-1',2',3',5',6',7'-hexahydrospiro[indoline-3,4'-pyrrolo[3,4-*b*]pyridine]-3'-carboxylate (3k')**: yellow solid, 42%, m.p. 247-249 °C; <sup>1</sup>H NMR (400 MHz, CDCl<sub>3</sub>)  $\delta$ : 7.53 (d,  $J = 6.8$  Hz, 2H, ArH), 7.46 ~ 7.43 (m, 2H, ArH), 7.40 ~ 7.37 (m, 2H, ArH), 7.34 ~ 7.26 (m, 4H, ArH), 7.18 ~ 7.14 (m, 2H, ArH), 6.69 (d,  $J = 7.6$  Hz, 1H, ArH), 5.04 (d,  $J = 16.8$  Hz, 1H, CH), 5.02 (d,  $J = 16.8$  Hz, 1H, CH), 4.25 ~ 4.15 (m, 2H, CH), 3.69 ~ 3.66 (m, 1H, CH), 3.22 (s, 3H, OCH<sub>3</sub>), 2.83 (s, 3H, CH<sub>3</sub>); <sup>13</sup>C NMR (100 MHz, CDCl<sub>3</sub>)  $\delta$ : 176.1, 168.5, 167.4, 163.8, 144.7, 142.4, 142.2, 135.3, 130.9, 129.2, 129.1, 128.8, 128.0, 127.8, 127.7, 127.3, 124.9, 124.4, 110.5, 103.6, 52.1, 50.8, 47.2, 46.0, 45.0, 23.3; IR (KBr)  $\nu$ : 2960, 2854, 1771, 1737, 1705, 1645, 1608, 1517, 1463, 1442, 1395, 1352, 1258, 1180, 1113, 1076, 1040, 993, 848, 811, 761 cm<sup>-1</sup>; HRMS (ESI) Calcd. for C<sub>30</sub>H<sub>25</sub>ClN<sub>3</sub>O<sub>5</sub> ([M+H]<sup>+</sup>): 542.1477, Found: 542.1495.



### Methyl

***rel*-(3*R*,3'*R*)-1-benzyl-5-chloro-6'-methyl-2,5',7'-trioxo-1'-(*p*-tolyl)-1',2',3',5',6',7'-hexahydros piro[indoline-3,4'-pyrrolo[3,4-*b*]pyridine]-3'-carboxylate (3I)**: yellow solid, 48%, m.p. 231-233 °C; <sup>1</sup>H NMR (400 MHz, CDCl<sub>3</sub>) δ: 7.41 (d, *J* = 6.8 Hz, 2H, ArH), 7.37 ~ 7.33 (m, 2H, ArH), 7.29 ~ 7.25 (m, 2H, ArH), 7.23 (s, 1H, ArH), 7.19 ~ 7.16 (m, 3H, ArH), 7.10 (s, 1H, ArH), 6.66 (d, *J* = 8.4 Hz, 1H, ArH), 5.03 (d, *J* = 16.0 Hz, 1H, CH), 4.96 (d, *J* = 16.0 Hz, 1H, CH), 4.77 (t, *J* = 11.6 Hz, 1H, CH), 4.00 (d, *J* = 12.8 Hz, 1H, CH), 3.49 (s, 3H, OCH<sub>3</sub>), 3.37 (d, *J* = 10.4 Hz, 1H, CH), 2.79 (s, 3H, CH<sub>3</sub>), 2.39 (s, 3H, CH<sub>3</sub>); <sup>13</sup>C NMR (100 MHz, CDCl<sub>3</sub>) δ: 176.1, 168.8, 167.0, 163.7, 145.1, 142.6, 140.0, 137.4, 135.2, 131.2, 129.9, 128.8, 128.0, 127.6, 127.2, 125.0, 122.5, 110.4, 101.3, 52.5, 51.0, 46.7, 46.1, 44.5, 23.2, 21.1; IR (KBr) ν: 2941, 2863, 1756, 1722, 1694, 1637, 1602, 1521, 1471, 1434, 1397, 1352, 1253, 1176, 1108, 1068, 1034, 994, 856, 807, 759 cm<sup>-1</sup>; HRMS (ESI) Calcd. for C<sub>31</sub>H<sub>27</sub>ClN<sub>3</sub>O<sub>5</sub> ([M+H]<sup>+</sup>): 556.1634, Found: 556.1649.

### Methyl

***rel*-(3*S*,3'*R*)-1-benzyl-5-chloro-6'-methyl-2,5',7'-trioxo-1'-(*p*-tolyl)-1',2',3',5',6',7'-hexahydros piro[indoline-3,4'-pyrrolo[3,4-*b*]pyridine]-3'-carboxylate (3I')**: yellow solid, 36%, m.p. 232-234 °C; <sup>1</sup>H NMR (400 MHz, CDCl<sub>3</sub>) δ: 7.53 (d, *J* = 6.8 Hz, 2H, ArH), 7.40 ~ 7.37 (m, 2H, ArH), 7.32 ~ 7.29 (m, 1H, ArH), 7.26 ~ 7.23 (m, 2H, ArH), 7.20 ~ 7.13 (m, 4H, ArH), 6.69 (d, *J* = 8.4 Hz, 1H, ArH), 5.07 (d, *J* = 17.2 Hz, 1H, CH), 5.02 (d, *J* = 16.8 Hz, 1H, CH), 4.23 ~ 4.11 (m, 2H, CH), 3.68 ~ 3.65 (m, 1H, CH), 3.22 (s, 3H, OCH<sub>3</sub>), 2.82 (s, 3H, CH<sub>3</sub>), 2.40 (s, 3H, CH<sub>3</sub>); <sup>13</sup>C NMR (100 MHz, CDCl<sub>3</sub>) δ: 176.2, 168.6, 167.4, 163.8, 144.8, 142.2, 139.9, 137.4, 135.3, 131.0, 129.9, 129.1, 128.8, 127.9, 127.8, 127.7, 124.8, 124.4, 110.4, 102.8, 52.0, 50.8, 47.1, 45.9, 45.0, 23.3, 21.1; IR (KBr) ν: 2944, 2854, 1766, 1722, 1709, 1645, 1609, 1511, 1473, 1434, 1390, 1356, 1246, 1177, 1105, 1064, 1029, 998, 849, 812, 755 cm<sup>-1</sup>; HRMS (ESI) Calcd. for C<sub>31</sub>H<sub>27</sub>ClN<sub>3</sub>O<sub>5</sub> ([M+H]<sup>+</sup>): 556.1634, Found: 556.1650.

### Methyl

***rel*-(3*R*,3'*R*)-1-benzyl-5-chloro-1'-(4-methoxyphenyl)-6'-methyl-2,5',7'-trioxo-1',2',3',5',6',7'-hexahydrospiro[indoline-3,4'-pyrrolo[3,4-*b*]pyridine]-3'-carboxylate (3m)**: yellow solid, 60%, m.p. 229-231 °C; <sup>1</sup>H NMR (400 MHz, CDCl<sub>3</sub>) δ: 7.42 ~ 7.40 (m, 2H, ArH), 7.36 ~ 7.33 (m, 2H, ArH), 7.29 ~ 7.26 (m, 1H, ArH), 7.22 (d, *J* = 7.6 Hz, 2H, ArH), 7.17 (d, *J* = 7.6 Hz, 1H, ArH), 7.10 (s, 1H, ArH), 6.95 (d, *J* = 7.6 Hz, 2H, ArH), 6.66 (d, *J* = 8.4 Hz, 1H, ArH), 5.03 (d, *J* = 16.4 Hz, 1H, CH), 4.97 (d, *J* = 16.0 Hz, 1H, CH), 4.75 (t, *J* = 12.0 Hz, 1H, CH), 3.97 (d, *J* = 12.4 Hz,

1H, CH), 3.84 (s, 3H, OCH<sub>3</sub>), 3.49 (s, 3H, OCH<sub>3</sub>), 3.38 (d, *J* = 11.2 Hz, 1H, CH), 2.79 (s, 3H, CH<sub>3</sub>); <sup>13</sup>C NMR (100 MHz, CDCl<sub>3</sub>) δ: 176.2, 168.8, 167.0, 163.8, 158.8, 145.3, 142.6, 135.4, 135.2, 131.2, 128.8, 128.0, 127.6, 127.2, 126.6, 122.6, 114.4, 110.4, 100.5, 55.5, 52.5, 51.2, 46.7, 46.0, 44.5, 23.2; IR (KBr) ν: 2962, 2865, 1767, 1735, 1708, 1630, 1607, 1501, 1465, 1435, 1392, 1376, 1258, 1183, 1098, 1060, 1036, 980, 843, 797, 761 cm<sup>-1</sup>; HRMS (ESI) Calcd. for C<sub>31</sub>H<sub>27</sub>ClN<sub>3</sub>O<sub>6</sub> ([M+H]<sup>+</sup>): 572.1583, Found: 572.1603.

### Methyl

***rel*-(3*S*,3'*R*)-1-benzyl-5-chloro-1'-(4-methoxyphenyl)-6'-methyl-2,5',7'-trioxo-1',2',3',5',6',7'-hexahydrospiro[indoline-3,4'-pyrrolo[3,4-*b*]pyridine]-3'-carboxylate (3*m*'**): yellow solid, 21%, m.p. 245-247 °C; <sup>1</sup>H NMR (400 MHz, CDCl<sub>3</sub>) δ: 7.53 (d, *J* = 6.8 Hz, 2H, ArH), 7.38 ~ 7.37 (m, 2H, ArH), 7.32 ~ 7.28 (m, 1H, ArH), 7.24 ~ 7.22 (m, 2H, ArH), 7.17 ~ 7.13 (m, 2H, ArH), 6.95 (d, *J* = 8.0 Hz, 1H, ArH), 6.69 (d, *J* = 8.4 Hz, 1H, ArH), 5.06 (d, *J* = 15.6 Hz, 1H, CH), 5.02 (d, *J* = 15.6 Hz, 1H, CH), 4.21 ~ 4.08 (m, 2H, CH), 3.84 (s, 3H, OCH<sub>3</sub>), 3.68 ~ 3.65 (m, 1H, CH), 3.22 (s, 3H, OCH<sub>3</sub>), 2.82 (s, 3H, CH<sub>3</sub>); <sup>13</sup>C NMR (100 MHz, CDCl<sub>3</sub>) δ: 176.2, 168.6, 167.4, 163.8, 158.8, 145.0, 142.2, 135.3, 135.3, 131.1, 129.0, 128.8, 127.9, 127.8, 127.7, 126.4, 124.4, 114.5, 110.4, 102.1, 55.5, 52.0, 51.0, 47.1, 45.9, 45.0, 23.3; IR (KBr) ν: 2966, 2854, 1763, 1734, 1700, 1646, 1602, 1519, 1479, 1434, 1400, 1375, 1260, 1188, 1104, 1077, 1028, 989, 865, 794, 760 cm<sup>-1</sup>; HRMS (ESI) Calcd. for C<sub>31</sub>H<sub>27</sub>ClN<sub>3</sub>O<sub>6</sub> ([M+H]<sup>+</sup>): 572.1583, Found: 572.1603.

**2. General procedure for the reaction of MBH esters of isatins and β-enamino maleimides:** To a round flask was added MBH nitriles of isatins (0.20 mmol), β-enamino maleimides (0.40 mmol), DABCO (0.04 mmol) and acetonitrile (6.0 mL). The mixture was stirred at room temperature for about one hour. After removing the solvent by rotatory evaporation at reduced pressure, the residue was subjected to column chromatography with ethyl acetate and petroleum ether (V/V = 1:5) as eluent to give the pure products **4a-4f** and **4a'-4f'** for analysis.

***rel*-(3*R*,3'*R*)-1-Benzyl-5,6'-dimethyl-2,5',7'-trioxo-1'-phenyl-1',2',3',5',6',7'-hexahydrospiro [indoline-3,4'-pyrrolo[3,4-*b*]pyridine]-3'-carbonitrile (4a)**: yellow solid, 26%, m.p. >300 °C; <sup>1</sup>H NMR (400 MHz, CDCl<sub>3</sub>) δ: 7.47 ~ 7.43 (m, 2H, ArH), 7.40 ~ 7.32 (m, 5H, ArH), 7.29 ~ 7.26 (m, 3H, ArH), 7.07 (d, *J* = 8.0 Hz, 1H, ArH), 6.99 (s, 1H, ArH), 6.68 (d, *J* = 8.0 Hz, 1H, ArH), 5.04 (s, 2H, CH), 4.89 (t, *J* = 7.6 Hz, 1H, CH), 3.96 (dd, *J*<sub>1</sub> = 12.8 Hz, *J*<sub>2</sub> = 3.6 Hz, 1H, CH), 3.39 (dd, *J*<sub>1</sub> = 11.6 Hz, *J*<sub>2</sub> = 4.4 Hz, 1H, CH), 2.82 (s, 3H, CH<sub>3</sub>), 2.31 (s, 3H, CH<sub>3</sub>); <sup>13</sup>C NMR (100 MHz, CDCl<sub>3</sub>) δ: 174.3, 166.7, 145.0, 142.0, 140.8, 134.8, 133.1, 130.5, 129.4, 128.8, 127.7, 127.6, 127.0,

126.6, 125.1, 123.4, 115.4, 110.2, 101.6, 50.2, 46.7, 44.5, 34.5, 23.3, 21.2; IR (KBr)  $\nu$ : 3054, 2977, 2932, 2861, 1766, 1708, 1647, 1603, 1499, 1460, 1421, 1389, 1341, 1282, 1205, 1128, 1097, 1071, 1023, 987, 826, 752  $\text{cm}^{-1}$ ; HRMS (ESI) Calcd. for  $\text{C}_{30}\text{H}_{25}\text{N}_4\text{O}_3$  ( $[\text{M}+\text{H}]^+$ ): 511.1741, Found: 511.1747.

***rel*-(3*S*,3'*R*)-1-Benzyl-5,6'-dimethyl-2,5',7'-trioxo-1'-phenyl-1',2',3',5',6',7'-hexahydrospiro [indoline-3,4'-pyrrolo[3,4-*b*]pyridine]-3'-carbonitrile (4a')**: yellow solid, 29%, m.p. 276-278 °C;  $^1\text{H}$  NMR (400 MHz,  $\text{CDCl}_3$ )  $\delta$ : 7.47 ~ 7.44 (m, 2H, ArH), 7.38 ~ 7.26 (m, 8H, ArH), 7.21 (s, 1H, ArH), 7.08 (d,  $J = 7.6$  Hz, 1H, ArH), 6.69 (d,  $J = 8.0$  Hz, 1H, ArH), 5.09 (d,  $J = 15.6$  Hz, 1H, CH), 4.98 (d,  $J = 15.6$  Hz, 1H, CH), 4.52 (d,  $J = 12.8$  Hz, 1H, CH), 4.15 ~ 4.09 (m, 1H, CH), 3.45 ~ 3.37 (m, 1H, CH), 2.84 (s, 3H,  $\text{CH}_3$ ), 2.34 (s, 3H,  $\text{CH}_3$ );  $^{13}\text{C}$  NMR (100 MHz,  $\text{CDCl}_3$ )  $\delta$ : 174.8, 167.0, 163.6, 144.7, 142.2, 140.4, 134.9, 133.1, 130.5, 129.5, 128.9, 127.8, 127.7, 127.3, 126.9, 125.4, 125.2, 115.8, 110.0, 101.7, 50.8, 46.2, 44.5, 33.7, 23.4, 21.2; IR (KBr)  $\nu$ : 3044, 2980, 2942, 2870, 1764, 1701, 1645, 1600, 1492, 1465, 1427, 1395, 1342, 1290, 1211, 1121, 1107, 1070, 1038, 999, 832, 766  $\text{cm}^{-1}$ ; HRMS (ESI) Calcd. for  $\text{C}_{30}\text{H}_{25}\text{N}_4\text{O}_3$  ( $[\text{M}+\text{H}]^+$ ): 511.1741, Found: 511.1750.

***rel*-(3*R*,3'*R*)-1-Benzyl-5,6'-dimethyl-2,5',7'-trioxo-1'-(*p*-tolyl)-1',2',3',5',6',7'-hexahydrospiro [indoline -3,4'-pyrrolo[3,4-*b*]pyridine]-3'-carbonitrile (4b)**: yellow solid, 25%, m.p. >300 °C;  $^1\text{H}$  NMR (400 MHz,  $\text{CDCl}_3$ )  $\delta$ : 7.39 (d,  $J = 7.2$  Hz, 2H, ArH), 7.34 (t,  $J = 7.6$  Hz, 2H, ArH), 7.28 ~ 7.26 (m, 1H, ArH), 7.26 ~ 7.23 (m, 2H, ArH), 7.16 (d,  $J = 8.0$  Hz, 2H, ArH), 7.06 (d,  $J = 8.0$  Hz, 1H, ArH), 6.99 (s, 1H, ArH), 6.68 (d,  $J = 8.0$  Hz, 1H, ArH), 5.06 (d,  $J = 16.4$  Hz, 1H, CH), 5.02 (d,  $J = 16.4$  Hz, 1H, CH), 4.86 (t,  $J = 11.2$  Hz, 1H, CH), 3.92 (dd,  $J_1 = 12.8$  Hz,  $J_2 = 3.6$  Hz, 1H, CH), 3.88 (dd,  $J_1 = 11.6$  Hz,  $J_2 = 4.0$  Hz, 1H, CH), 2.81 (s, 3H,  $\text{CH}_3$ ), 2.40 (s, 3H,  $\text{CH}_3$ ), 2.31 (s, 3H,  $\text{CH}_3$ );  $^{13}\text{C}$  NMR (100 MHz,  $\text{CDCl}_3$ )  $\delta$ : 174.4, 166.8, 163.5, 145.2, 140.8, 139.5, 137.9, 134.8, 133.1, 130.4, 130.0, 128.8, 127.6, 127.0, 126.7, 125.0, 123.4, 115.5, 110.1, 100.8, 50.3, 46.7, 44.5, 34.5, 23.3, 21.2, 21.1; IR (KBr)  $\nu$ : 3048, 2980, 2933, 2878, 1758, 1713, 1638, 1596, 1509, 1456, 1413, 1373, 1349, 1280, 1202, 1128, 1090, 1075, 1032, 987, 829, 766  $\text{cm}^{-1}$ ; HRMS (ESI) Calcd. for  $\text{C}_{31}\text{H}_{27}\text{N}_4\text{O}_3$  ( $[\text{M}+\text{H}]^+$ ): 503.2078, Found: 503.2085.

***rel*-(3*S*,3'*R*)-1-Benzyl-5,6'-dimethyl-2,5',7'-trioxo-1'-(*p*-tolyl)-1',2',3',5',6',7'-hexahydrospiro [indoline-3,4'-pyrrolo[3,4-*b*]pyridine]-3'-carbonitrile (4b')**: yellow solid, 33%, m.p. 244-246 °C;  $^1\text{H}$  NMR (400 MHz,  $\text{CDCl}_3$ )  $\delta$ : 7.40 ~ 7.33 (m, 4H, ArH), 7.29 ~ 7.25 (m, 3H, ArH), 7.21 ~ 7.19 (m, 3H, ArH), 7.08 (d,  $J = 8.0$  Hz, 1H, ArH), 6.68 (d,  $J = 8.0$  Hz, 1H, ArH), 5.08 (d,  $J = 16.0$  Hz, 1H, CH), 4.99 (d,  $J = 16.0$  Hz, 1H, CH), 4.48 (dd,  $J_1 = 12.8$  Hz,  $J_2 = 3.2$  Hz, 1H, CH), 4.12 ~

4.07 (m, 1H, CH), 3.44 (dd,  $J_1 = 7.6$  Hz,  $J_2 = 3.2$  Hz, CH), 2.84 (s, 3H, CH<sub>3</sub>), 2.40 (s, 3H, CH<sub>3</sub>), 2.34 (s, 3H, CH<sub>3</sub>); <sup>13</sup>C NMR (100 MHz, CDCl<sub>3</sub>) δ: 174.9, 167.0, 163.7, 144.9, 140.4, 139.7, 137.9, 134.9, 133.0, 130.5, 130.1, 128.9, 127.7, 127.4, 126.9, 125.4, 125.1, 115.9, 110.0, 101.0, 50.8, 46.2, 44.5, 33.7, 23.4, 21.2, 21.2; IR (KBr) ν: 3068, 2982, 2943, 2873, 1766, 1708, 1641, 1590, 1487, 1462, 1426, 1382, 1356, 1289, 1214, 1116, 1088, 1065, 1033, 992, 826, 751 cm<sup>-1</sup>; HRMS (ESI) Calcd. for C<sub>31</sub>H<sub>27</sub>N<sub>4</sub>O<sub>3</sub> ([M+H]<sup>+</sup>): 503.2078, Found: 503.2088.

***rel*-(3*S*,3'*R*)-1-Benzyl-5-chloro-6'-methyl-2,5',7'-trioxo-1'-phenyl-1',2',3',5',6',7'-hexahydro-spiro[indoline-3,4'-pyrrolo[3,4-*b*]pyridine]-3'-carbonitrile (4c')**: yellow solid, 37%, m.p. 269-271 °C; <sup>1</sup>H NMR (400 MHz, CDCl<sub>3</sub>) δ: 7.51 ~ 7.45 (m, 2H, ArH), 7.41 ~ 7.35 (m, 7H, ArH), 7.33 ~ 7.32 (m, 1H, ArH), 7.31 ~ 7.30 (m, 1H, ArH), 7.28 ~ 7.25 (m, 1H, ArH), 6.72 (d,  $J = 8.4$  Hz, 1H, ArH), 5.10 (d,  $J = 16.0$  Hz, 1H, CH), 4.99 (d,  $J = 16.0$  Hz, 1H, CH), 4.51 (dd,  $J_1 = 13.2$  Hz,  $J_2 = 5.2$  Hz, 1H, CH), 4.14 ~ 4.09 (m, 1H, CH), 3.49 ~ 3.46 (m, 1H, CH), 2.86 (s, 3H, CH<sub>3</sub>); <sup>13</sup>C NMR (100 MHz, CDCl<sub>3</sub>) δ: 174.5, 166.9, 163.4, 144.9, 141.9, 141.4, 134.3, 130.2, 129.8, 129.5, 129.0, 129.0, 128.0, 127.9, 126.9, 125.9, 125.2, 125.1, 115.4, 111.3, 100.6, 50.7, 46.3, 44.7, 33.6, 23.5; IR (KBr) ν: 3058, 2977, 2942, 2880, 1773, 1712, 1645, 1584, 1508, 1473, 1420, 1394, 1357, 1293, 1214, 1126, 1099, 1066, 1027, 1002, 832, 768 cm<sup>-1</sup>; HRMS (ESI) Calcd. for C<sub>29</sub>H<sub>22</sub>ClN<sub>4</sub>O<sub>3</sub> ([M+H]<sup>+</sup>): 509.1375, Found: 509.1385.

***rel*-(3*S*,3'*R*)-1-Benzyl-5-chloro-6'-methyl-2,5',7'-trioxo-1'-(*p*-tolyl)-1',2',3',5',6',7'-hexahydro-spiro[indoline-3,4'-pyrrolo[3,4-*b*]pyridine]-3'-carbonitrile (4d')**: yellow solid, 39%, m.p. 232-234 °C; <sup>1</sup>H NMR (400 MHz, CDCl<sub>3</sub>) δ: 7.38 ~ 7.27 (m, 9H, ArH), 7.20 (d,  $J = 7.6$  Hz, 1H, ArH), 6.71 (d,  $J = 8.4$  Hz, 1H, ArH), 5.10 (d,  $J = 15.6$  Hz, 1H, CH), 4.99 (d,  $J = 16.0$  Hz, 1H, CH), 4.47 (d,  $J = 12.8$  Hz, 1H, CH), 4.12 ~ 4.06 (m, 1H, CH), 3.47 (d,  $J = 6.0$  Hz, 1H, CH), 2.85 (s, 3H, CH<sub>3</sub>), 2.41 (s, 3H, CH<sub>3</sub>); <sup>13</sup>C NMR (100 MHz, CDCl<sub>3</sub>) δ: 174.6, 166.9, 163.4, 145.1, 141.4, 139.4, 138.2, 134.3, 130.2, 130.1, 129.0, 128.9, 127.9, 126.9, 125.1, 125.1, 115.4, 111.2, 50.8, 46.3, 44.7, 33.6, 23.4, 21.2; IR (KBr) ν: 3040, 2961, 2943, 2859, 1760, 1715, 1631, 1598, 1492, 1468, 1431, 1380, 1355, 1280, 1216, 1112, 1088, 1061, 1029, 996, 826, 777 cm<sup>-1</sup>; HRMS (ESI) Calcd. for C<sub>30</sub>H<sub>24</sub>ClN<sub>4</sub>O<sub>3</sub> ([M+H]<sup>+</sup>): 523.1531, Found: 523.1542.

***rel*-(3*S*,3'*R*)-1-Benzyl-5-chloro-1'-(4-methoxyphenyl)-6'-methyl-2,5',7'-trioxo-1',2',3',5',6',7'-hexahydrospiro[indoline-3,4'-pyrrolo[3,4-*b*]pyridine]-3'-carbonitrile (4e')**: yellow solid, 31%, m.p. 227-229 °C; <sup>1</sup>H NMR (400 MHz, CDCl<sub>3</sub>) δ: 7.38 ~ 7.34 (m, 5H, ArH), 7.33 ~ 7.28 (m, 1H,

ArH), 7.27 ~ 7.23 (m, 3H, ArH), 6.97 (d,  $J = 8.8$  Hz, 1H, ArH), 6.71 (d,  $J = 8.4$  Hz, 1H, ArH), 5.10 (d,  $J = 16.0$  Hz, 1H, CH), 4.98 (d,  $J = 16.0$  Hz, 1H, CH), 4.46 (dd,  $J_1 = 13.2$  Hz,  $J_2 = 3.2$  Hz, 1H, CH), 4.09 ~ 4.03 (m, 1H, CH), 3.85 (s, 3H, OCH<sub>3</sub>), 3.45 (dd,  $J_1 = 8.0$  Hz,  $J_2 = 3.2$  Hz, 1H, CH), 2.85 (s, 3H, CH<sub>3</sub>); <sup>13</sup>C NMR (100 MHz, CDCl<sub>3</sub>)  $\delta$ : 174.6, 166.9, 163.4, 159.2, 145.2, 141.4, 134.7, 134.3, 130.1, 129.1, 129.0, 128.9, 127.9, 126.9, 126.7, 125.2, 115.5, 114.7, 111.2, 99.2, 55.5, 50.9, 46.2, 44.7, 33.5, 23.4; IR (KBr)  $\nu$ : 3058, 2976, 2947, 2870, 1763, 1705, 1633, 1598, 1507, 1473, 1429, 1381, 1345, 1281, 1192, 1133, 1106, 1078, 1020, 1002, 824, 751 cm<sup>-1</sup>; HRMS (ESI) Calcd. for C<sub>30</sub>H<sub>24</sub>ClN<sub>4</sub>O<sub>4</sub> ([M+H]<sup>+</sup>): 539.1481, Found: 539.1494.

***rel*-(3*R*,3'*R*)-1-Butyl-5,6'-dimethyl-2,5',7'-trioxo-1'-phenyl-1',2',3',5',6',7'-hexahydrospiro [indoline-3,4'-pyrrolo[3,4-*b*]pyridine]-3'-carbonitrile (4f)**: yellow solid, 23%, m.p. 218-220 °C; <sup>1</sup>H NMR (400 MHz, CDCl<sub>3</sub>)  $\delta$ : 7.46 ~ 7.42 (m, 2H, ArH), 7.37 ~ 7.34 (m, 1H, ArH), 7.28 ~ 7.25 (m, 2H, ArH), 7.20 (d,  $J = 7.2$  Hz, 2H, ArH), 6.97 (s, 1H, ArH), 6.90 (d,  $J = 8.0$  Hz, 1H, ArH), 4.85 (t,  $J = 11.6$  Hz, 1H, CH), 3.91 (dd,  $J_1 = 12.4$  Hz,  $J_2 = 3.6$  Hz, 1H, CH), 3.86 ~ 3.71 (m, 2H, CH), 3.32 (dd,  $J_1 = 15.8$  Hz,  $J_2 = 4.0$  Hz, 1H, CH), 2.79 (s, 3H, CH<sub>3</sub>), 2.35 (s, 3H, CH<sub>3</sub>), 1.78 ~ 1.70 (m, 2H, CH), 1.49 ~ 1.46 (m, 1H, CH), 1.44 ~ 1.40 (m, 1H, CH), 0.96 (t,  $J = 7.6$  Hz, 3H, CH<sub>3</sub>); <sup>13</sup>C NMR (100 MHz, CDCl<sub>3</sub>)  $\delta$ : 174.0, 166.7, 163.5, 145.0, 142.1, 141.1, 132.8, 130.4, 129.4, 127.7, 126.8, 125.1, 123.5, 115.2, 109.2, 101.6, 50.1, 46.6, 40.7, 34.5, 29.7, 29.3, 23.3, 21.2, 20.1, 13.7; IR (KBr)  $\nu$ : 3052, 2971, 2936, 2867, 1761, 1707, 1641, 1594, 1497, 1463, 1425, 1384, 1351, 1285, 1204, 1125, 1096, 1071, 1030, 995, 821, 758 cm<sup>-1</sup>; HRMS (ESI) Calcd. for C<sub>27</sub>H<sub>27</sub>N<sub>4</sub>O<sub>3</sub> ([M+H]<sup>+</sup>): 455.2078, Found: 455.2093.

***rel*-(3*S*,3'*R*)-1-Butyl-5,6'-dimethyl-2,5',7'-trioxo-1'-phenyl-1',2',3',5',6',7'-hexahydrospiro [indoline-3,4'-pyrrolo[3,4-*b*]pyridine]-3'-carbonitrile (4f')**: yellow solid, 54%, m.p. 227-229 °C; <sup>1</sup>H NMR (400 MHz, CDCl<sub>3</sub>)  $\delta$ : 7.47 ~ 7.43 (m, 2H, ArH), 7.38 ~ 7.35 (m, 1H, ArH), 7.32 ~ 7.26 (m, 2H, ArH), 7.22 ~ 7.20 (m, 2H, ArH), 6.89 (d,  $J = 8.0$  Hz, 1H, ArH), 4.52 ~ 4.48 (m, 1H, CH), 4.08 (dd,  $J_1 = 12.8$  Hz,  $J_2 = 3.6$  Hz, 1H, CH), 3.79 (t,  $J = 7.2$  Hz, 2H, CH), 3.38 ~ 3.36 (m, 1H, CH), 2.82 (s, 3H, CH<sub>3</sub>), 2.37 (s, 3H, CH<sub>3</sub>), 1.80 ~ 1.71 (m, 2H, CH), 1.49 ~ 1.40 (m, 1H, CH), 0.98 (t,  $J = 7.6$  Hz, 1H, CH<sub>3</sub>); <sup>13</sup>C NMR (100 MHz, CDCl<sub>3</sub>)  $\delta$ : 174.4, 167.0, 163.7, 144.6, 142.2, 140.7, 132.8, 130.5, 129.4, 127.7, 127.4, 125.5, 125.2, 115.8, 109.1, 101.8, 50.7, 46.1, 40.6, 33.6, 29.3, 23.4, 21.3, 20.1, 13.8; IR (KBr)  $\nu$ : 3067, 2964, 2950, 2857, 1762, 1714, 1650, 1596, 1507, 1478, 1430, 1388, 1354, 1283, 1212, 1126, 1107, 1075, 1032, 994, 829, 763 cm<sup>-1</sup>; HRMS (ESI) Calcd. for C<sub>27</sub>H<sub>27</sub>N<sub>4</sub>O<sub>3</sub> ([M+H]<sup>+</sup>): 455.2078, Found: 455.2094.

**rel-(3*S*,3'*R*)-1-Butyl-5-fluoro-6'-methyl-2,5',7'-trioxo-1'-phenyl-1',2',3',5',6',7'-hexahydro-spiro[indoline-3,4'-pyrrolo[3,4-*b*]pyridine]-3'-carbonitrile (4g')**: yellow solid, 48%, m.p. 211-213 °C; <sup>1</sup>H NMR (400 MHz, CDCl<sub>3</sub>) δ: 7.48 ~ 7.44 (m, 2H, ArH), 7.40 ~ 7.36 (m, 1H, ArH), 7.30 (d, *J* = 7.6 Hz, 2H, ArH), 7.21 ~ 7.18 (m, 1H, ArH), 7.15 ~ 7.11 (m, 1H, ArH), 6.95 ~ 6.92 (m, 1H, ArH), 4.57 (d, *J* = 13.2 Hz, 1H, CH), 4.07 ~ 4.01 (m, 1H, CH), 3.80 (t, *J* = 7.6 Hz, 2H, CH), 3.37 ~ 3.35 (m, 1H, CH), 2.83 (s, 3H, CH<sub>3</sub>), 1.76 ~ 1.70 (m, 2H, CH), 1.48 ~ 1.39 (m, 2H, CH), 0.98 (t, *J* = 7.6 Hz, 3H, CH<sub>3</sub>); <sup>13</sup>C NMR (100 MHz, CDCl<sub>3</sub>) δ: 174.3, 166.9, 163.4, 159.2 (d, *J* = 246.4 Hz), 144.9, 142.0, 139.1 (d, *J* = 2.0 Hz), 129.50, 128.8 (d, *J* = 8.1 Hz), 128.0, 125.3, 116.5 (d, *J* = 23.2 Hz), 115.5, 113.2 (d, *J* = 25.3 Hz), 109.9 (d, *J* = 8.1 Hz), 100.5, 50.6, 46.1, 40.8, 33.3, 29.2, 23.4, 20.0, 13.7; IR (KBr) ν: 3058, 2969, 2942, 2865, 1765, 1700, 1632, 1609, 1516, 1463, 1436, 1382, 1357, 1283, 1210, 1129, 1091, 1068, 1035, 990, 828, 754 cm<sup>-1</sup>; HRMS (ESI) Calcd. for C<sub>26</sub>H<sub>24</sub>FN<sub>4</sub>O<sub>3</sub> ([M+H]<sup>+</sup>): 459.1827, Found: 459.1843.

**3. General procedure for the reaction of MBH imides of isatins and β-enamino maleimides:** To a round flask was added MBH imides of isatins (0.20 mmol), β-enamino imides (0.40 mmol), DABCO (0.10 mmol) and acetonitrile (6.0 mL). The mixture was stirred at room temperature for about twelve hours. After removing the solvent by rotatory evaporation at reduced pressure, the residue was subjected to column chromatography with ethyl acetate and petroleum ether (V/V = 1:5) as eluent to give the pure products **5a-5g** and **5a'-5g'** for analysis.

**rel-(3a*R*,8*R*,8a*S*)-1'-Benzyl-4-(4-chlorophenyl)-2,6-dimethyl-3a,8a-dihydro-1*H*-spiro[dipyrrolo[3,4-*b*:3',4'-*e*]pyridine-8,3'-indoline]-1,2',3,5,7(2*H*,4*H*,6*H*)-pentaone (5a)**: yellow solid, 35%, m.p. 232-234 °C; <sup>1</sup>H NMR (400 MHz, CDCl<sub>3</sub>) δ: 7.53 (d, *J* = 8.4 Hz, 2H, ArH), 7.43 (d, *J* = 8.8 Hz, 2H, ArH), 7.35 ~ 7.23 (m, 7H, ArH), 7.17 (t, *J* = 7.6 Hz, 1H, ArH), 6.80 (d, *J* = 8.0 Hz, 1H, ArH), 4.97 (d, *J* = 16.4 Hz, 1H, CH), 4.79 (d, *J* = 14.8 Hz, 1H, CH), 4.79 (d, *J* = 8.8 Hz, 1H, CH), 3.65 (d, *J* = 8.4 Hz, 1H, CH), 2.80 (s, 3H, CH<sub>3</sub>), 2.79 (s, 3H, CH<sub>3</sub>); <sup>13</sup>C NMR (100 MHz, CDCl<sub>3</sub>) δ: 174.5, 172.5, 171.0, 166.8, 163.4, 144.2, 143.6, 140.6, 134.8, 134.2, 129.7, 129.6, 128.8, 128.3, 128.1, 127.6, 126.9, 123.7, 123.0, 110.1, 102.2, 61.3, 46.3, 44.6, 44.3, 24.8, 23.4; IR (KBr) ν: 3045, 3022, 2937, 2883, 1790, 1709, 1645, 1596, 1499, 1427, 1340, 1243, 1198, 1111, 1075, 1022, 987, 924, 866, 818, 787, 751 cm<sup>-1</sup>; HRMS (ESI) Calcd. for C<sub>31</sub>H<sub>23</sub>ClN<sub>4</sub>NaO<sub>5</sub> ([M+Na]<sup>+</sup>): 589.1249, Found: 589.1261.

**rel-(3a*R*,8*S*,8a*S*)-1'-Benzyl-4-(4-chlorophenyl)-2,6-dimethyl-3a,8a-dihydro-1*H*-spiro[dipyrrolo[3,4-*b*:3',4'-*e*]pyridine-8,3'-indoline]-1,2',3,5,7(2*H*,4*H*,6*H*)-pentaone (5a')**: yellow solid, 44%,

m.p. 259-261 °C; <sup>1</sup>H NMR (400 MHz, CDCl<sub>3</sub>) δ: 7.57 ~ 7.52 (m, 4H, ArH), 7.45 ~ 7.38 (m, 4H, ArH), 7.32 ~ 7.28 (m, 1H, ArH), 7.15 (t, *J* = 8.0 Hz, 1H, ArH), 6.3 (t, *J* = 7.6 Hz, 1H, ArH), 6.77 (d, *J* = 7.2 Hz, 1H, ArH), 6.67 (d, *J* = 8.0 Hz, 1H, ArH), 5.17 (d, *J* = 16.0 Hz, 1H, CH), 5.04 (d, *J* = 16.0 Hz, 1H, CH), 4.91 (d, *J* = 8.4 Hz, 1H, CH), 4.00 (d, *J* = 8.4 Hz, 1H, CH), 2.82 (s, 3H, CH<sub>3</sub>), 2.57 (s, 3H, CH<sub>3</sub>); <sup>13</sup>C NMR (100 MHz, CDCl<sub>3</sub>) δ: 174.9, 173.7, 171.0, 166.9, 163.6, 143.6, 143.4, 140.9, 134.8, 134.3, 130.0, 129.7, 128.8, 128.5, 127.6, 127.2, 127.0, 123.1, 122.6, 110.6, 103.7, 62.1, 45.7, 45.5, 44.9, 24.2, 23.5; IR (KBr) ν: 3048, 3030, 2938, 2881, 1788, 1721, 1648, 1594, 1495, 1426, 1341, 1240, 1180, 1104, 1076, 1012, 983, 924, 872, 828, 769, 748 cm<sup>-1</sup>; HRMS (ESI) Calcd. for C<sub>31</sub>H<sub>23</sub>ClN<sub>4</sub>NaO<sub>5</sub> ([M+Na]<sup>+</sup>): 589.1249, Found: 589.1267.

***rel*-(3*aR*,8*S*,8*aS*)-1'-Benzyl-2,5',6-trimethyl-4-phenyl-3*a*,8*a*-dihydro-1*H*-spiro[dipyrrolo[3,4-*b*:3',4'-*e*]pyridine-8,3'-indoline]-1,2',3,5,7(2*H*,4*H*,6*H*)-pentaone (5*b*')**: yellow solid, 30%, m.p. >300 °C; <sup>1</sup>H NMR (400 MHz, CDCl<sub>3</sub>) δ: 7.63 ~ 7.61 (m, 2H, ArH), 7.53 (d, *J* = 7.6 Hz, 2H, ArH), 7.51 ~ 7.47 (m, 2H, ArH), 7.45 ~ 7.37 (m, 3H, ArH), 7.31 ~ 7.27 (m, 1H, ArH), 6.95 ~ 6.93 (m, 1H, ArH), 6.59 (s, 1H, ArH), 6.54 (d, *J* = 8.0 Hz, 1H, ArH), 5.16 (d, *J* = 16.4 Hz, 1H, CH), 5.04 (d, *J* = 16.0 Hz, 1H, CH), 4.92 (d, *J* = 8.4 Hz, 1H, CH), 3.98 (d, *J* = 8.0 Hz, 1H, CH), 2.82 (s, 3H, CH<sub>3</sub>), 2.58 (s, 3H, CH<sub>3</sub>), 2.22 (s, 3H, CH<sub>3</sub>); <sup>13</sup>C NMR (100 MHz, CDCl<sub>3</sub>) δ: 174.9, 173.8, 171.1, 167.1, 163.7, 143.7, 142.6, 141.2, 135.0, 132.2, 130.2, 129.5, 128.8, 128.5, 127.5, 127.4, 127.0, 123.9, 110.2, 103.4, 62.4, 45.8, 45.5, 44.9, 24.1, 23.4, 20.9; IR (KBr) ν: 3055, 3027, 2936, 2880, 1787, 1713, 1641, 1592, 1498, 1431, 1344, 1239, 1191, 1113, 1073, 1024, 988, 932, 860, 819, 786, 752 cm<sup>-1</sup>; HRMS (ESI) Calcd. for C<sub>32</sub>H<sub>26</sub>N<sub>4</sub>NaO<sub>5</sub> ([M+Na]<sup>+</sup>): 569.1795, Found: 569.1802.

***rel*-(3*aR*,8*R*,8*aS*)-1'-Benzyl-4-(4-chlorophenyl)-2,5',6-trimethyl-3*a*,8*a*-dihydro-1*H*-spiro[dipyrrolo [3,4-*b*:3',4'-*e*]pyridine-8,3'-indoline]-1,2',3,5,7(2*H*,4*H*,6*H*)-pentaone (5*c*)**: yellow solid, 28%, m.p. 243-245 °C; <sup>1</sup>H NMR (400 MHz, CDCl<sub>3</sub>) δ: 7.52 (d, *J* = 8.4 Hz, 2H, ArH), 7.42 (d, *J* = 8.8 Hz, 2H, ArH), 7.35 ~ 7.31 (m, 2H, ArH), 7.27 ~ 7.25 (m, 3H, ArH), 7.11 ~ 7.08 (m, 2H, ArH), 6.68 (d, *J* = 7.6 Hz, 1H, ArH), 4.94 (d, *J* = 16.0 Hz, 1H, CH), 4.77 (d, *J* = 15.6 Hz, 1H, CH), 4.77 (d, *J* = 8.4 Hz, 1H, CH), 3.63 (d, *J* = 8.4 Hz, 1H, CH), 2.80 (s, 3H, CH<sub>3</sub>), 2.79 (s, 3H, CH<sub>3</sub>), 2.35 (s, 3H, CH<sub>3</sub>); <sup>13</sup>C NMR (100 MHz, CDCl<sub>3</sub>) δ: 174.4, 172.6, 171.1, 166.8, 163.4, 144.1, 141.2, 140.8, 135.0, 134.1, 133.3, 130.1, 129.5, 128.7, 128.3, 128.1, 127.5, 126.9, 123.9, 109.8, 102.6, 61.4, 46.4, 44.6, 44.3, 24.8, 23.4, 21.3; IR (KBr) ν: 3043, 3013, 2921, 2875, 1790, 1723, 1640,

1594, 1500, 1432, 1358, 1232, 1201, 1119, 1066, 1029, 1008, 942, 864, 820, 792, 760 cm<sup>-1</sup>;  
HRMS (ESI) Calcd. for C<sub>32</sub>H<sub>25</sub>ClN<sub>4</sub>NaO<sub>5</sub> ([M+Na]<sup>+</sup>): 603.1406, Found: 603.1420.

**rel-(3aR,8S,8aS)-1'-Benzyl-4-(4-chlorophenyl)-2,5',6-trimethyl-3a,8a-dihydro-1H-spiro[dipyrrolo [3,4-b:3',4'-e]pyridine-8,3'-indoline]-1,2',3,5,7(2H,4H,6H)-pentaone (5c')**: yellow solid, 36%, m.p. 267-269 °C; <sup>1</sup>H NMR (400 MHz, CDCl<sub>3</sub>) δ: 7.58 ~ 7.50 (m, 4H, ArH), 7.41 ~ 7.36 (m, 4H, ArH), 7.30 ~ 7.26 (m, 1H, ArH), 6.94 (d, *J* = 8.0 Hz, 1H, ArH), 6.65 ~ 6.53 (m, 2H, ArH), 5.11 (d, *J* = 16.4 Hz, 1H, CH), 4.98 (d, *J* = 16.0 Hz, 1H, CH), 4.91 (d, *J* = 8.4 Hz, 1H, CH), 3.99 (d, *J* = 8.4 Hz, 1H, CH), 2.81 (s, 3H, CH<sub>3</sub>), 2.56 (s, 3H, CH<sub>3</sub>), 2.21 (s, 3H, CH<sub>3</sub>); <sup>13</sup>C NMR (100 MHz, CDCl<sub>3</sub>) δ: 174.9, 173.9, 171.1, 167.0, 163.7, 143.4, 141.2, 141.0, 135.0, 134.2, 132.3, 130.2, 129.6, 128.8, 128.5, 127.6, 127.3, 126.9, 123.9, 110.2, 103.8, 62.2, 45.8, 45.5, 44.8, 24.1, 23.5, 20.9; IR (KBr) ν: 3050, 3025, 2942, 2881, 1794, 1707, 1649, 1594, 1488, 1432, 1334, 1250, 1192, 1118, 1076, 1023, 998, 928, 864, 823, 779, 750 cm<sup>-1</sup>; HRMS (ESI) Calcd. for C<sub>32</sub>H<sub>25</sub>ClN<sub>4</sub>NaO<sub>5</sub> ([M+Na]<sup>+</sup>): 603.1406, Found: 603.1418.

**rel-(3aR,8R,8aS)-1'-Benzyl-5'-chloro-4-(4-methoxyphenyl)-2,6-dimethyl-3a,8a-dihydro-1H-spiro[di-pyrrolo[3,4-b:3',4'-e]pyridine-8,3'-indoline]-1,2',3,5,7(2H,4H,6H)-pentaone (5d)**: yellow solid, 26%, m.p. 182-184 °C; <sup>1</sup>H NMR (400 MHz, CDCl<sub>3</sub>) δ: 7.45 (d, *J* = 2.0 Hz, 1H, ArH), 7.33 ~ 7.29 (m, 3H, ArH), 7.21 ~ 7.19 (m, 2H, ArH), 7.14 (s, 1H, ArH), 7.06 (dd, *J*<sub>1</sub> = 8.4 Hz, *J*<sub>2</sub> = 2.4 Hz, 1H, ArH), 6.84 (d, *J* = 8.8 Hz, 2H, ArH), 6.67 (d, *J* = 8.8 Hz, 2H, ArH), 6.43 (d, *J* = 8.4 Hz, 1H, CH), 5.93 (s, 1H, CH), 5.09 (d, *J* = 15.6 Hz, 1H, CH), 4.40 (d, *J* = 15.6 Hz, 1H, CH), 3.80 (s, 3H, OCH<sub>3</sub>), 3.00 (s, 3H, CH<sub>3</sub>), 2.89 (s, 3H, CH<sub>3</sub>); <sup>13</sup>C NMR (100 MHz, CDCl<sub>3</sub>) δ: 173.3, 171.5, 169.1, 168.8, 167.0, 158.1, 144.9, 142.0, 140.4, 134.6, 130.8, 129.1, 129.0, 128.7, 128.1, 127.0, 126.5, 126.1, 125.7, 114.3, 110.5, 95.0, 55.5, 51.2, 44.6, 29.7, 24.1, 23.9; IR (KBr) ν: 3053, 3026, 2946, 2874, 1797, 1719, 1642, 1600, 1492, 1435, 1348, 1230, 1195, 1115, 1083, 1026, 990, 937, 855, 811, 793, 752 cm<sup>-1</sup>; HRMS (ESI) Calcd. for C<sub>32</sub>H<sub>25</sub>ClN<sub>4</sub>NaO<sub>6</sub> ([M+Na]<sup>+</sup>): 619.1355, Found: 619.1358.

**rel-(3aR,8S,8aS)-1'-Benzyl-5'-chloro-4-(4-methoxyphenyl)-2,6-dimethyl-3a,8a-dihydro-1H-spiro[di-pyrrolo[3,4-b:3',4'-e]pyridine-8,3'-indoline]-1,2',3,5,7(2H,4H,6H)-pentaone (5d')**: yellow solid, 31%, m.p. 240-242 °C; <sup>1</sup>H NMR (400 MHz, CDCl<sub>3</sub>) δ: 7.53 ~ 7.38 (m, 6H, ArH), 7.33 ~ 7.29 (m, 1H, ArH), 7.13 ~ 7.11 (m, 1H, ArH), 6.99 (d, *J* = 8.4 Hz, 2H, ArH), 6.75 (s, 1H, ArH), 6.58 (d, *J* = 8.4 Hz, 1H, ArH), 5.14 (d, *J* = 16.0 Hz, 1H, CH), 5.06 (d, *J* = 16.0 Hz, 1H,



CH), 4.89 (d,  $J = 8.4$  Hz, 1H, CH), 3.97 (d,  $J = 8.4$  Hz, 1H, CH), 3.86 (s, 3H, OCH<sub>3</sub>), 2.83 (s, 3H, CH<sub>3</sub>), 2.66 (s, 3H, CH<sub>3</sub>); <sup>13</sup>C NMR (100 MHz, CDCl<sub>3</sub>)  $\delta$ : 174.8, 173.6, 171.0, 167.0, 163.4, 159.6, 144.2, 142.2, 134.9, 134.5, 129.7, 129.2, 128.9, 127.9, 127.8, 127.0, 123.6, 114.6, 111.4, 101.1, 62.4, 55.5, 45.7, 45.4, 24.2, 23.4; IR (KBr)  $\nu$ : 3055, 3033, 2933, 2886, 1785, 1713, 1641, 1590, 1495, 1438, 1349, 1235, 1184, 1103, 1070, 1028, 979, 934, 863, 818, 788, 752 cm<sup>-1</sup>; HRMS (ESI) Calcd. for C<sub>32</sub>H<sub>25</sub>ClN<sub>4</sub>NaO<sub>6</sub> ([M+Na]<sup>+</sup>): 619.1355, Found: 619.1360.

***rel*-(3a*R*,8*R*,8a*S*)-1'-Butyl-2,5',6-trimethyl-4-phenyl-3a,8a-dihydro-1*H*-spiro[dipyrrolo[3,4-*b*:3',4'-*e*] pyridine-8,3'-indoline]-1,2',3,5,7(2*H*,4*H*,6*H*)-pentaone (5e)**: yellow solid, 21%, m.p. 279-281 °C; <sup>1</sup>H NMR (400 MHz, CDCl<sub>3</sub>)  $\delta$ : 7.58 (d,  $J = 7.6$  Hz, 1H, ArH), 7.48 ~ 7.45 (t,  $J = 7.6$  Hz, 2H, ArH), 7.42 ~ 7.38 (m, 1H, ArH), 7.18 (d,  $J = 8.8$  Hz, 2H, ArH), 7.05 (s, 1H, ArH), 6.83 (d,  $J = 8.0$  Hz, 1H, ArH), 4.77 (d,  $J = 8.4$  Hz, 1H, CH), 3.72 ~ 3.64 (m, 1H, CH), 3.60 ~ 3.53 (m, 2H, CH), 2.93 (s, 3H, CH<sub>3</sub>), 2.76 (s, 3H, CH<sub>3</sub>), 2.37 (s, 3H, CH<sub>3</sub>), 1.65 ~ 1.59 (m, 2H, CH), 1.40 ~ 1.31 (m, 2H, CH), 0.94 (t,  $J = 8.0$  Hz, 3H, CH); <sup>13</sup>C NMR (100 MHz, CDCl<sub>3</sub>)  $\delta$ : 174.2, 172.7, 171.2, 166.9, 163.5, 144.3, 142.5, 141.5, 132.8, 130.0, 129.3, 128.6, 128.2, 126.9, 123.8, 108.9, 102.4, 61.6, 46.3, 44.6, 40.4, 29.3, 24.8, 23.3, 21.3, 20.0, 13.7; IR (KBr)  $\nu$ : 3065, 3022, 2944, 2878, 1792, 1719, 1636, 1603, 1481, 1425, 1354, 1243, 1196, 1114, 1069, 1027, 991, 931, 868, 829, 792, 762 cm<sup>-1</sup>; HRMS (ESI) Calcd. for C<sub>29</sub>H<sub>28</sub>N<sub>4</sub>NaO<sub>5</sub> ([M+Na]<sup>+</sup>): 535.1952, Found: 535.1960.

***rel*-(3a*R*,8*S*,8a*S*)-1'-Butyl-2,5',6-trimethyl-4-phenyl-3a,8a-dihydro-1*H*-spiro[dipyrrolo[3,4-*b*:3',4'-*e*] pyridine-8,3'-indoline]-1,2',3,5,7(2*H*,4*H*,6*H*)-pentaone (5e')**: yellow solid, 57%, m.p. 293-295 °C; <sup>1</sup>H NMR (400 MHz, CDCl<sub>3</sub>)  $\delta$ : 7.60 (d,  $J = 6.0$  Hz, 2H, ArH), 7.50 ~ 7.40 (m, 2H, ArH), 7.44 ~ 7.40 (m, 1H, ArH), 7.09 (d,  $J = 8.0$  Hz, 2H, ArH), 6.57 (s, 1H, ArH), 4.88 (d,  $J = 8.4$  Hz, 1H, CH), 3.89 (d,  $J = 8.0$  Hz, 1H, CH), 3.83 (t,  $J = 7.6$  Hz, 2H, CH), 2.79 (s, 3H, CH<sub>3</sub>), 2.57 (s, 3H, CH<sub>3</sub>), 2.26 (s, 3H, CH<sub>3</sub>), 1.84 ~ 1.76 (m, 2H, CH), 1.58 ~ 1.48 (m, 2H, CH), 1.02 (t,  $J = 7.6$  Hz, 3H, CH<sub>3</sub>); <sup>13</sup>C NMR (100 MHz, CDCl<sub>3</sub>)  $\delta$ : 174.4, 173.9, 171.1, 167.0, 163.7, 143.6, 142.7, 141.6, 131.8, 130.1, 129.4, 128.4, 127.5, 127.0, 124.1, 109.2, 103.6, 62.3, 45.7, 45.4, 40.8, 29.1, 24.0, 23.3, 20.9, 20.1, 13.8; IR (KBr)  $\nu$ : 3042, 3021, 2914, 2861, 1733, 1700, 1655, 1576, 1463, 1411, 1337, 1279, 1181, 1143, 1054, 1014, 977, 932, 864, 839, 756, 711 cm<sup>-1</sup>; HRMS (ESI) Calcd. for C<sub>29</sub>H<sub>28</sub>N<sub>4</sub>NaO<sub>5</sub> ([M+Na]<sup>+</sup>): 535.1952, Found: 535.1961.

***rel*-(3a*R*,8*R*,8a*S*)-1'-Butyl-4-(4-methoxyphenyl)-2,5',6-trimethyl-3a,8a-dihydro-1*H*-spiro[dip**

**yrrolo[3,4-*b*:3',4'-*e*]pyridine-8,3'-indoline]-1,2',3,5,7(2*H*,4*H*,6*H*)-pentaone (5f):** yellow solid, 16%, m.p. 189-191 °C; <sup>1</sup>H NMR (400 MHz, CDCl<sub>3</sub>) δ: 7.26 (s, 1H, ArH), 7.14 (s, 1H, ArH), 7.01 (d, *J* = 8.0 Hz, 1H, ArH), 6.84 (d, *J* = 8.8 Hz, 2H, ArH), 6.65 (d, *J* = 8.8 Hz, 2H, ArH), 6.55 (d, *J* = 8.0 Hz, 1H, ArH), 5.98 (s, 1H, CH), 3.81 ~ 3.72 (m, 1H, CH), 3.77 (s, 3H, OCH<sub>3</sub>), 3.31 ~ 3.24 (m, 1H, CH), 2.97 (s, 3H, CH<sub>3</sub>), 2.88 (s, 3H, CH<sub>3</sub>), 2.31 (s, 3H, CH<sub>3</sub>), 1.65 ~ 1.55 (m, 2H, CH), 1.34 ~ 1.35 (m, 1H, CH), 1.34 ~ 1.30 (m, 1H, CH), 0.93 (t, *J* = 7.2 Hz, 3H, CH<sub>3</sub>); <sup>13</sup>C NMR (100 MHz, CDCl<sub>3</sub>) δ: 173.3, 171.5, 169.6, 169.0, 167.1, 157.8, 146.0, 141.9, 139.8, 132.7, 131.0, 129.5, 127.5, 127.0, 125.8, 125.4, 114.1, 108.7, 96.4, 55.5, 51.3, 40.5, 29.4, 24.0, 23.8, 21.2, 20.2, 13.7; IR (KBr) ν: 3058, 3038, 2930, 2878, 1779, 1715, 1643, 1597, 1502, 1440, 1345, 1236, 1188, 1110, 1074, 1033, 982, 935, 876, 822, 778 cm<sup>-1</sup>; HRMS (ESI) Calcd. for C<sub>30</sub>H<sub>30</sub>N<sub>4</sub>NaO<sub>6</sub> ([M+Na]<sup>+</sup>): 565.2058, Found: 565.2063.

***rel*-(3*aR*,8*S*,8*aS*)-1'-Butyl-4-(4-methoxyphenyl)-2,5',6-trimethyl-3*a*,8*a*-dihydro-1*H*-spiro**

**[dipyrrolo[3,4-*b*:3',4'-*e*]pyridine-8,3'-indoline]-1,2',3,5,7(2*H*,4*H*,6*H*)-pentaone (5f')**: yellow solid, 54%, m.p. 123-125 °C; <sup>1</sup>H NMR (400 MHz, CDCl<sub>3</sub>) δ: 7.51 (d, *J* = 8.4 Hz, 2H, ArH), 7.18 (d, *J* = 8.0 Hz, 1H, ArH), 7.06 (s, 1H, ArH), 6.97 (d, *J* = 8.8 Hz, 2H, ArH), 6.83 (d, *J* = 8.0 Hz, 1H, ArH), 4.73 (d, *J* = 8.4 Hz, 1H, CH), 3.85 (s, 3H, OCH<sub>3</sub>), 3.72 ~ 3.64 (m, 1H, CH), 3.60 ~ 3.53 (m, 2H, CH), 2.92 (s, 3H, CH<sub>3</sub>), 2.76 (s, 3H, CH<sub>3</sub>), 2.37 (s, 3H, CH<sub>3</sub>), 1.65 ~ 1.59 (m, 2H, CH), 1.40 ~ 1.36 (m, 1H, CH), 1.34 ~ 1.30 (m, 1H, CH), 0.93 (t, *J* = 7.2 Hz, 3H, CH<sub>3</sub>); <sup>13</sup>C NMR (100 MHz, CDCl<sub>3</sub>) δ: 174.3, 172.7, 171.2, 166.9, 163.6, 159.4, 144.7, 141.5, 135.1, 132.9, 129.9, 128.5, 123.9, 114.4, 108.9, 100.8, 61.6, 55.5, 46.2, 44.4, 40.4, 29.3, 24.7, 23.2, 21.3, 20.0, 13.7; IR (KBr) ν: 3060, 3036, 2943, 2896, 1789, 1720, 1643, 1601, 1508, 1437, 1344, 1238, 1177, 1108, 1075, 1029, 983, 938, 862, 810, 768 cm<sup>-1</sup>; HRMS (ESI) Calcd. for C<sub>30</sub>H<sub>30</sub>N<sub>4</sub>NaO<sub>6</sub> ([M+Na]<sup>+</sup>): 565.2058, Found: 565.2066.

***rel*-(3*aR*,8*S*,8*aS*)-1'-Butyl-5'-chloro-2,6-dimethyl-4-phenyl-3*a*,8*a*-dihydro-1*H*-spiro[dipyrrolo**

**[3,4-*b*:3',4'-*e*]pyridine-8,3'-indoline]-1,2',3,5,7(2*H*,4*H*,6*H*)-pentaone (5g')**: yellow solid, 48%, m.p. 290-292 °C; <sup>1</sup>H NMR (400 MHz, CDCl<sub>3</sub>) δ: 7.58(m, 2H, ArH), 7.49 ~ 7.40 (m, 3H, ArH), 7.29 ~ 7.26 (m, 1H, ArH), 6.85 (d, *J* = 8.4 Hz, 1H, ArH), 6.73 (m, 1H, ArH), 4.90 (d, *J* = 8.4 Hz, 1H, CH), 3.88 (d, *J* = 8.4 Hz, 1H, CH), 3.82 (t, *J* = 7.2 Hz, 2H, CH), 2.79 (s, 3H, CH<sub>3</sub>), 2.65 (s, 3H, CH<sub>3</sub>), 1.82 ~ 1.74 (m, 2H, CH), 1.56 ~ 1.47 (m, 2H, CH), 1.02 (t, *J* = 7.2 Hz, 3H, CH<sub>3</sub>); <sup>13</sup>C NMR (100 MHz, CDCl<sub>3</sub>) δ: 174.2, 173.6, 170.9, 166.9, 163.4, 143.9, 142.7, 142.3, 129.7, 129.5,

129.3, 128.6, 127.5, 127.0, 123.8, 110.4, 102.3, 62.2, 45.6, 45.4, 41.0, 29.0, 24.2, 23.4, 20.1, 13.7;  
IR (KBr)  $\nu$ : 3051, 3039, 2934, 2896, 1797, 1708, 1647, 1590, 1485, 1427, 1354, 1238, 1180, 1106,  
1076, 1033, 982, 936, 868, 823, 780, 755  $\text{cm}^{-1}$ ; HRMS (ESI) Calcd. for  $\text{C}_{28}\text{H}_{25}\text{ClN}_4\text{NaO}_5$   
( $[\text{M}+\text{Na}]^+$ ): 555.1406, Found: 555.1415.

## Methyl

*rel*-(3*R*,3'*R*)-1-butyl-5-chloro-6'-methyl-2,5,7'-trioxo-1'-(*p*-tolyl)-1',2',3',5',6',7'-hexahydros-  
piro[indoline-3,4'-pyrrolo[3,4-*b*]pyridine]-3'-carboxylate (3a):

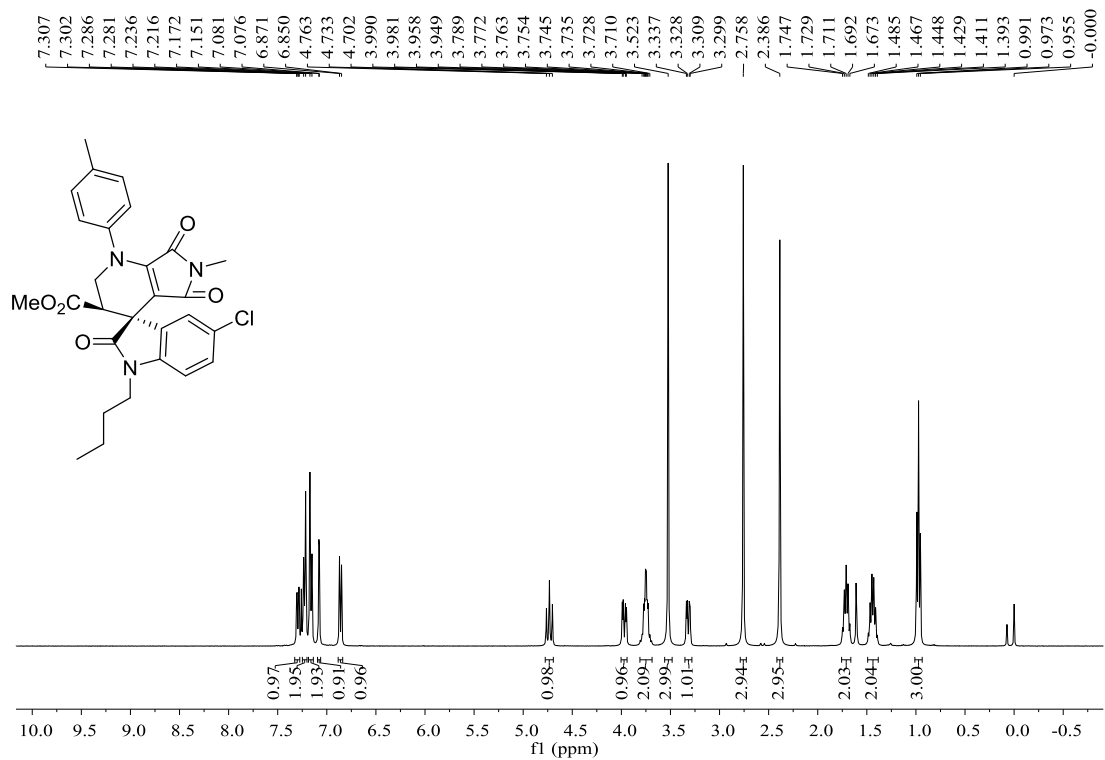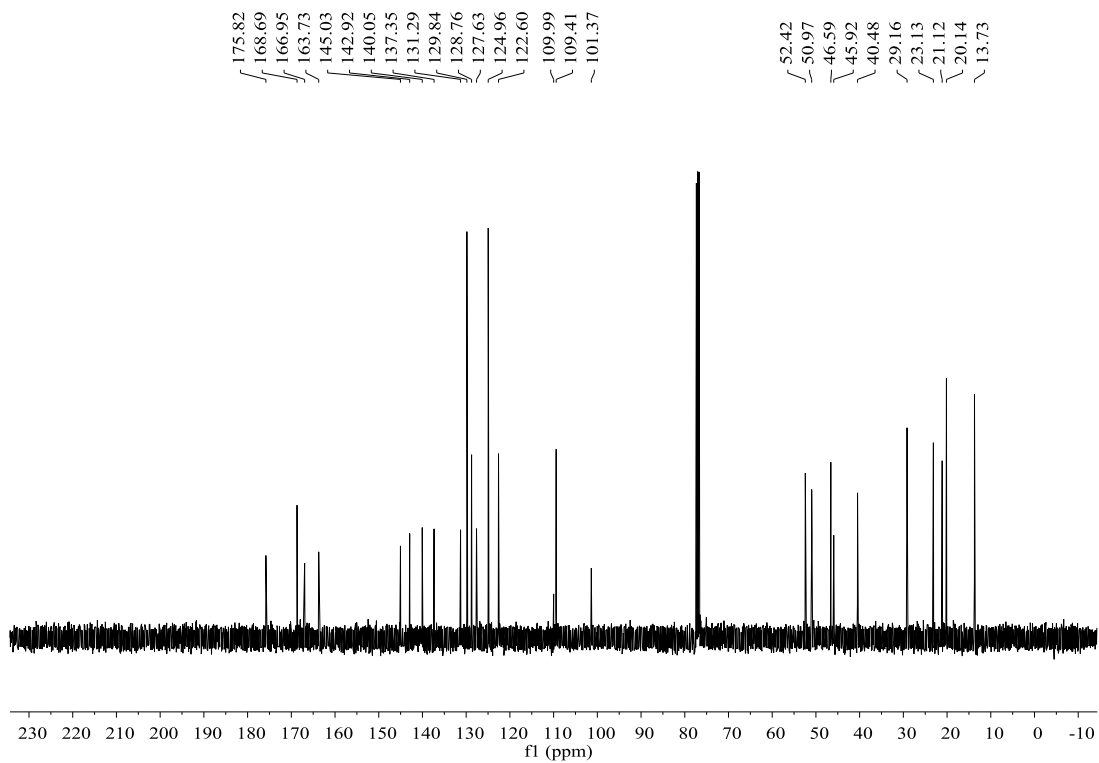

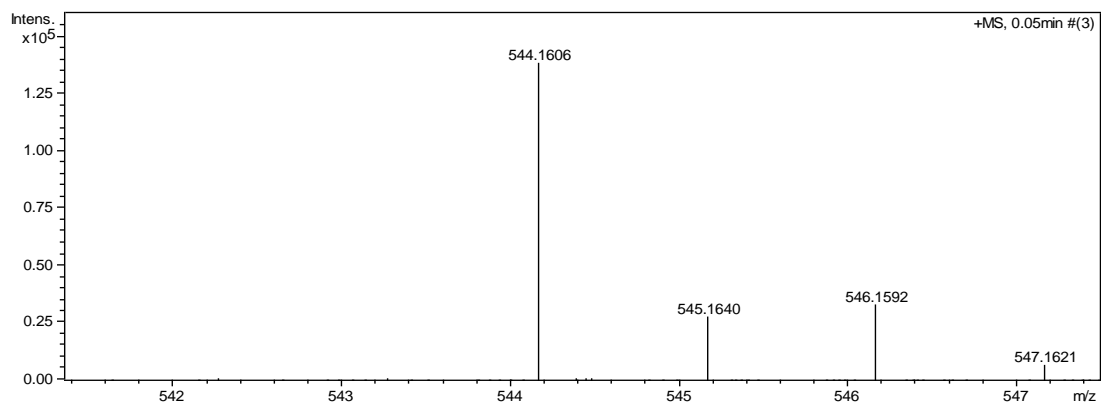

## Methyl

***rel*-(3*S*,3'*R*)-1-butyl-5-chloro-6'-methyl-2,5',7'-trioxo-1'-(*p*-tolyl)-1',2',3',5',6',7'-hexahydrospiro[indoline-3,4'-pyrrolo[3,4-*b*]pyridine]-3'-carboxylate (3a):**

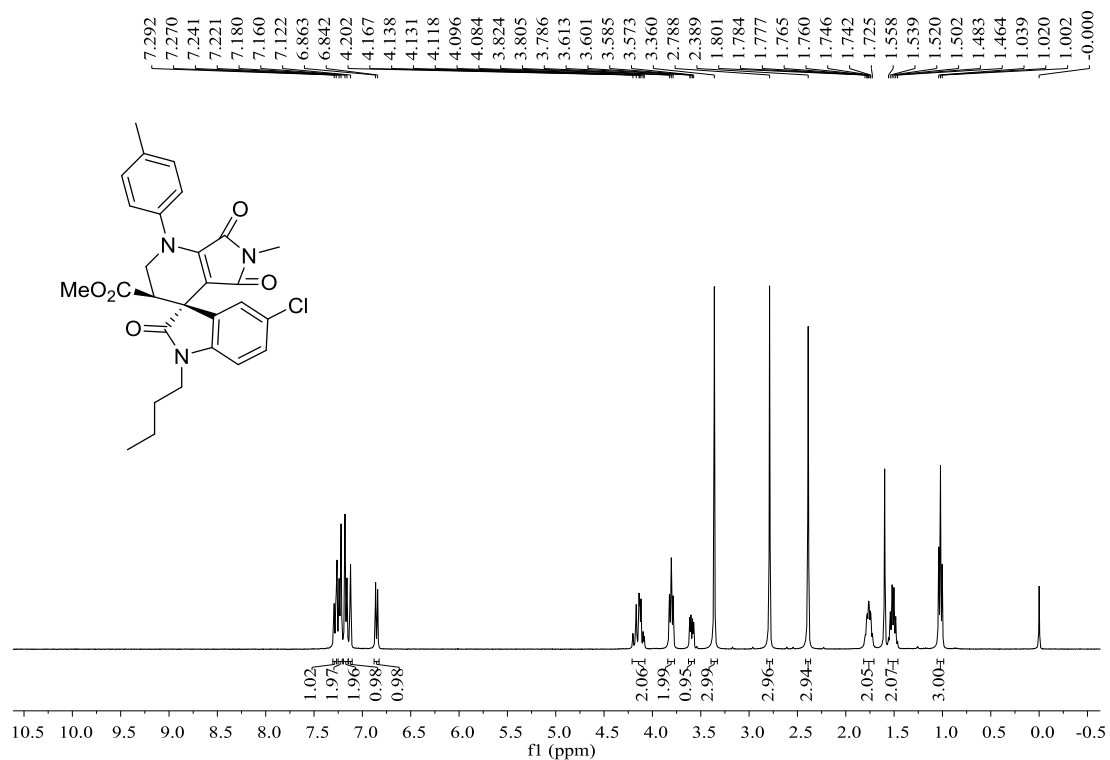

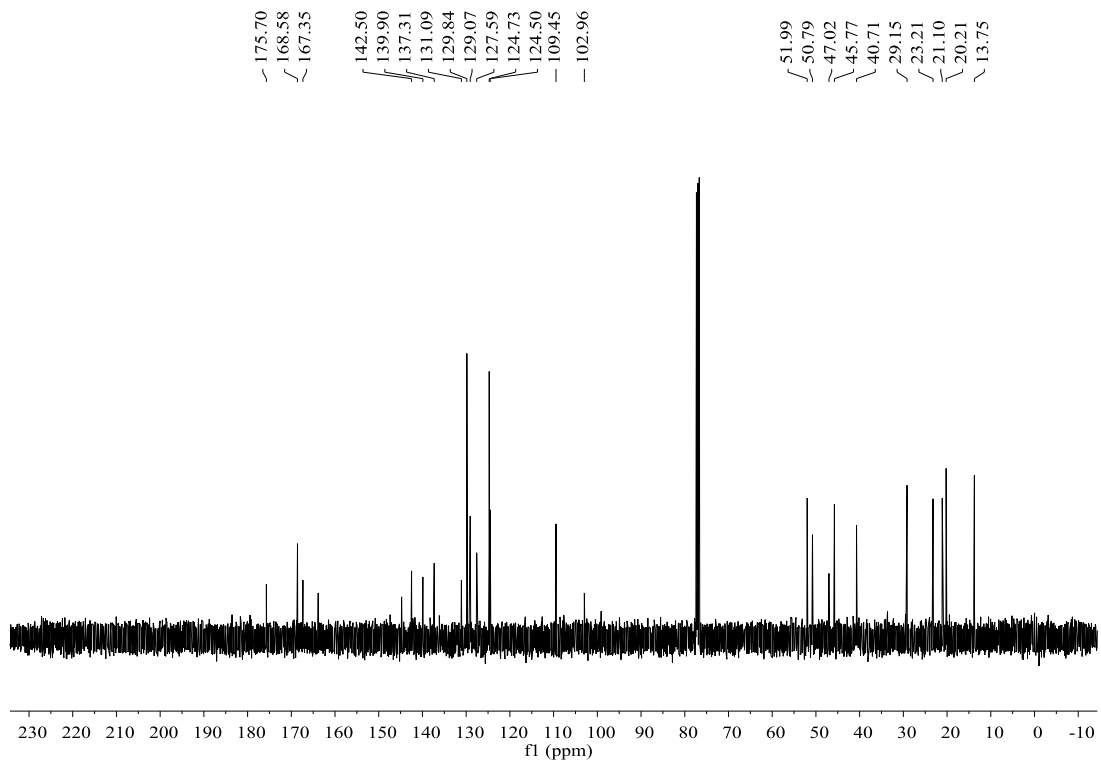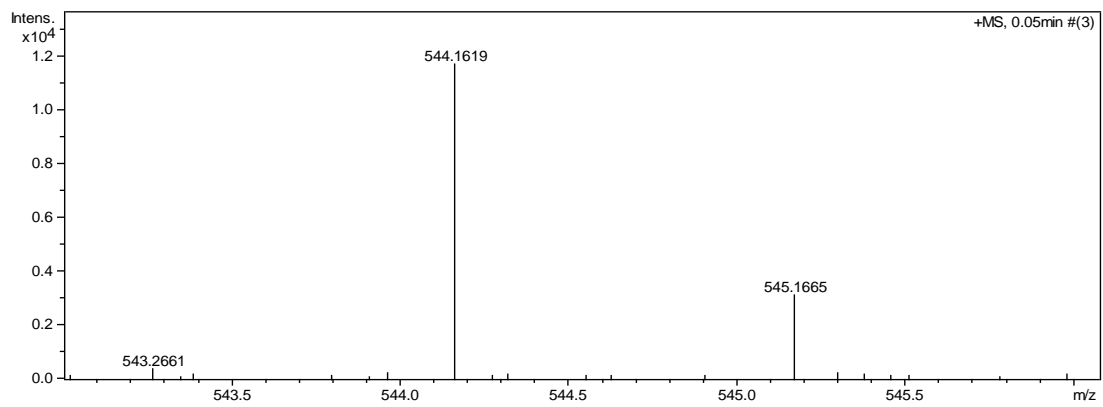

## Methyl

*rel*-(3*R*,3'*R*)-1-butyl-5-chloro-6'-methyl-2,5,7'-trioxo-1'-phenyl-1',2',3',5',6',7'-hexahydrospiro[indoline-3,4'-pyrrolo[3,4-*b*]pyridine]-3'-carboxylate (3b):

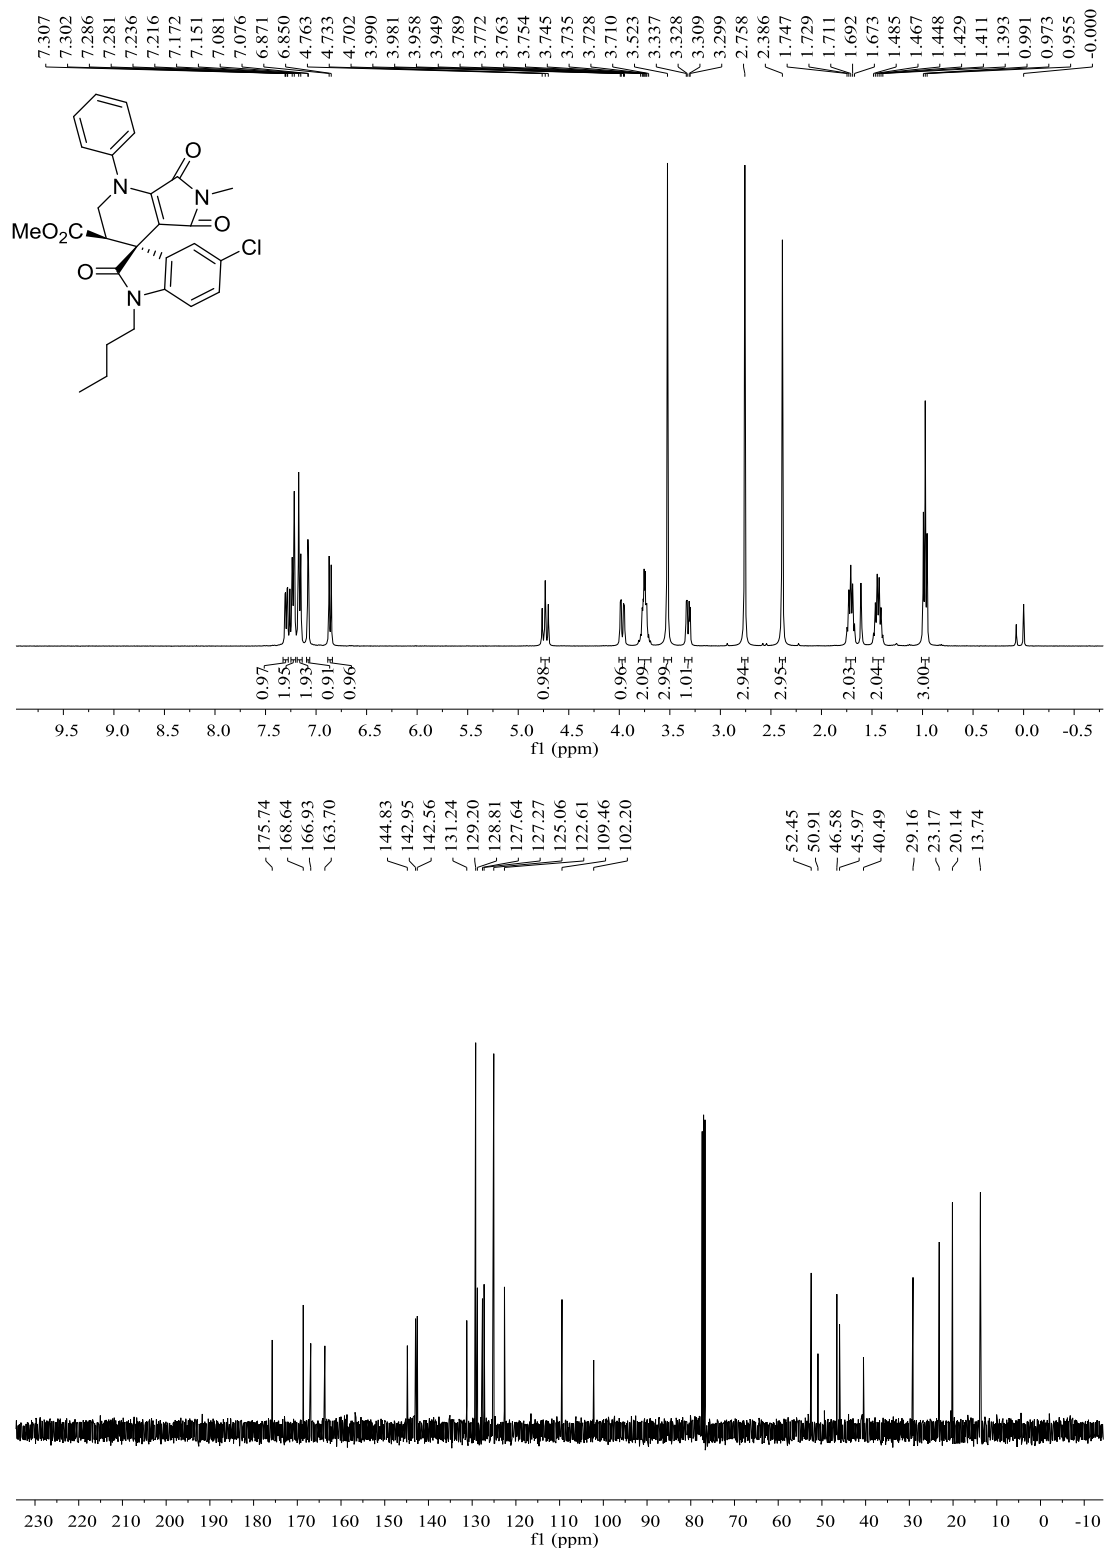

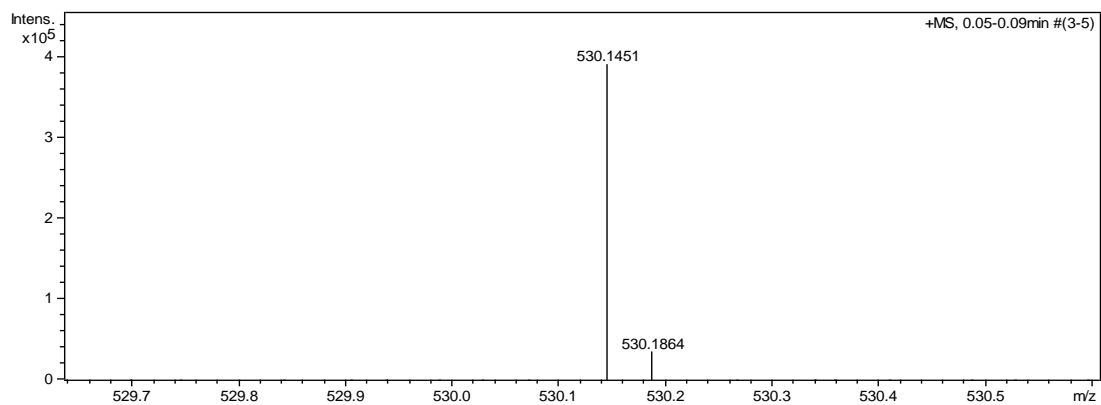

### Methyl

***rel*-(3*S*,3'*R*)-1-butyl-5-chloro-6'-methyl-2,5',7'-trioxo-1'-phenyl-1',2',3',5',6',7'-hexahydrospiro[o[indoline-3,4'-pyrrolo[3,4-*b*]pyridine]-3'-carboxylate (3*b*'):**

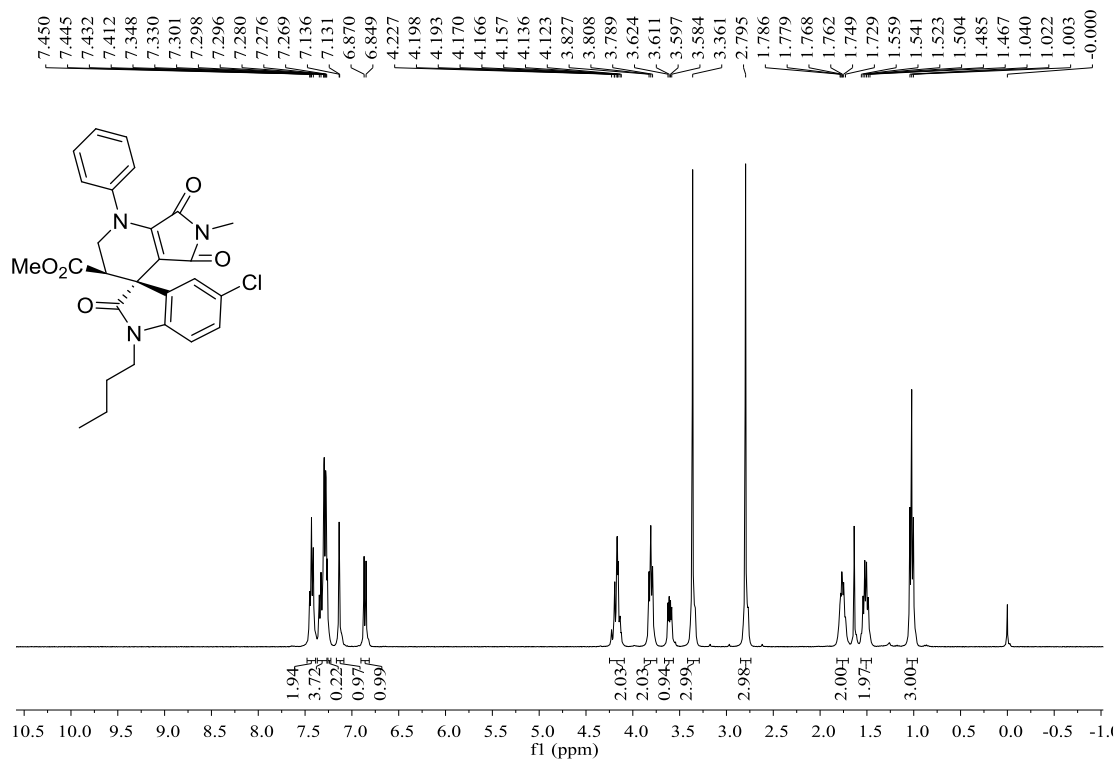



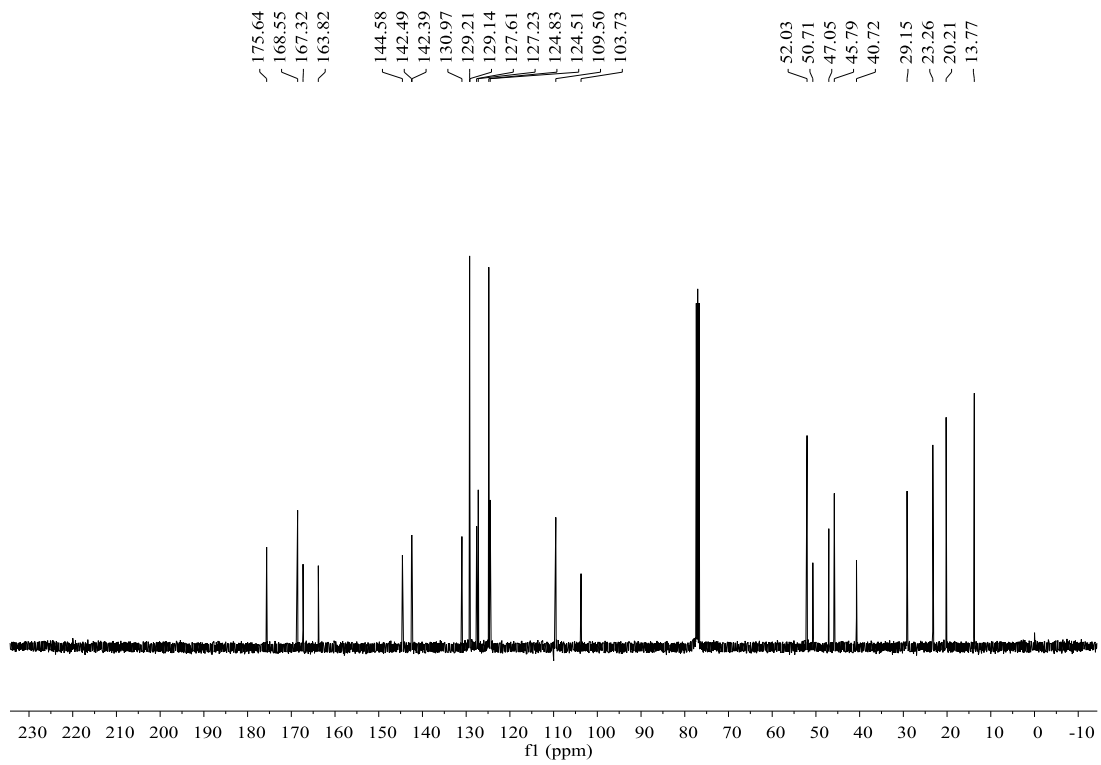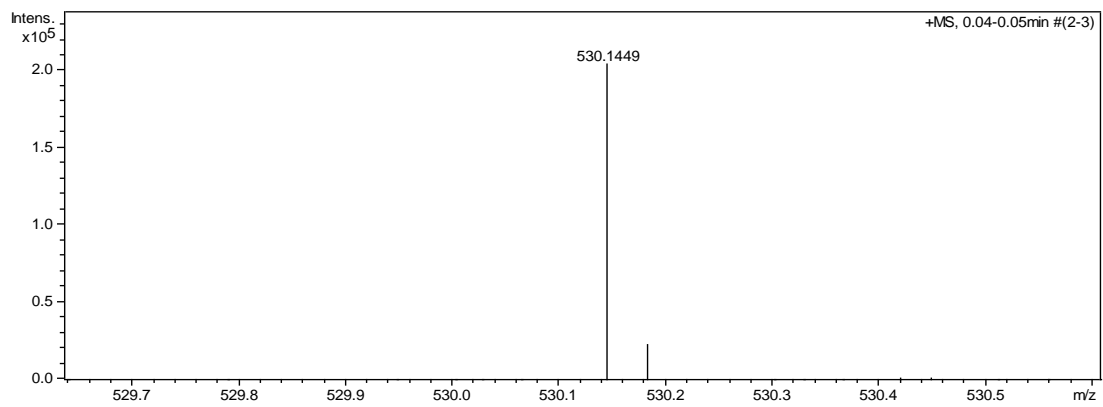

**Methyl**

***rel*-(3*R*,3'*R*)-1-butyl-5-chloro-1'-(4-methoxyphenyl)-6'-methyl-2,5,7'-trioxo-1,2',3',5',6',7'-hexahydrospiro[indoline-3,4'-pyrrolo[3,4-*b*]pyridine]-3'-carboxylate (3c):**

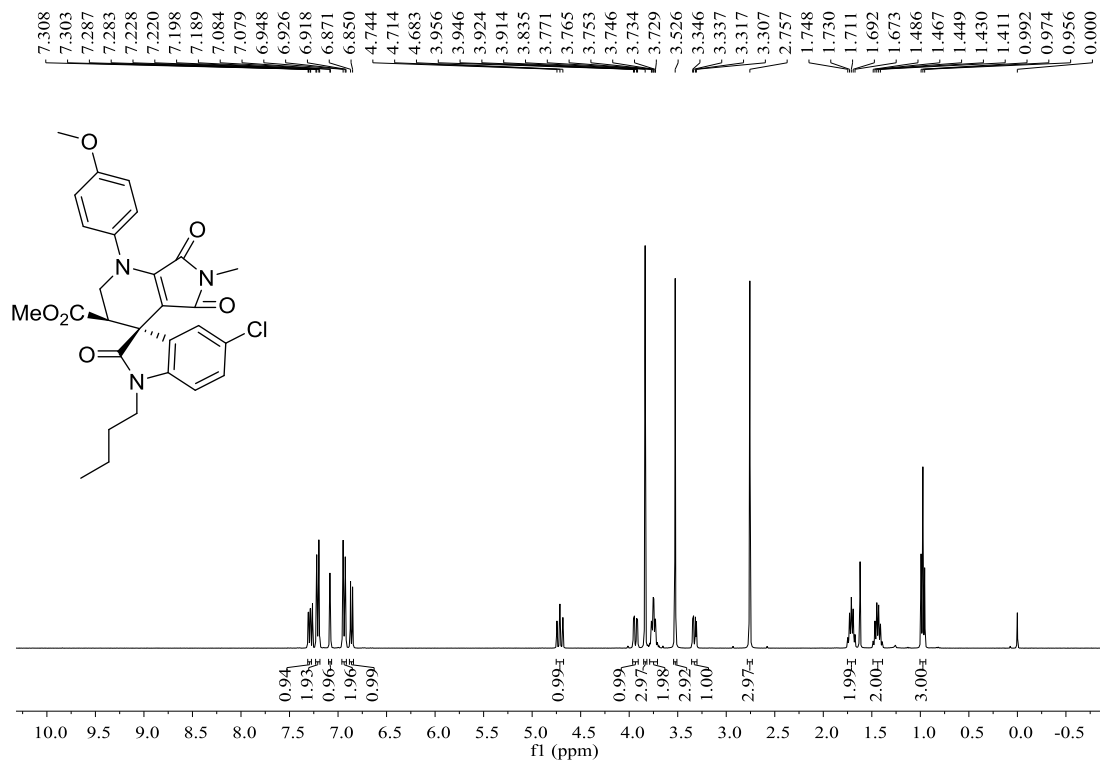

175.88, 168.71, 166.95, 163.77, 158.75, 145.20, 142.89, 135.46, 131.30, 128.75, 127.64, 126.57, 122.63, 114.40, 109.41, 100.52, 55.48, 52.43, 51.11, 46.60, 45.88, 40.48, 29.16, 23.11, 20.14, 13.74

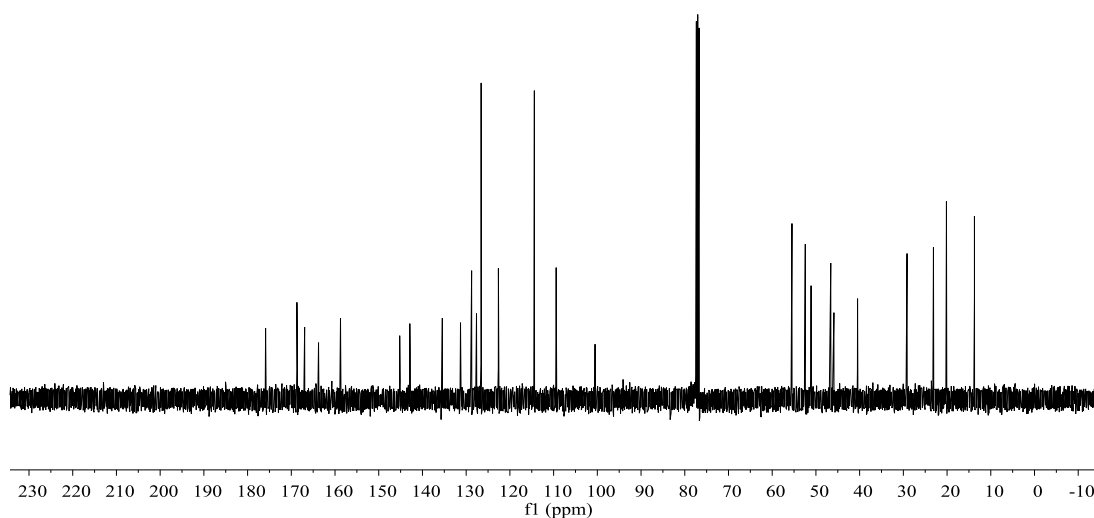

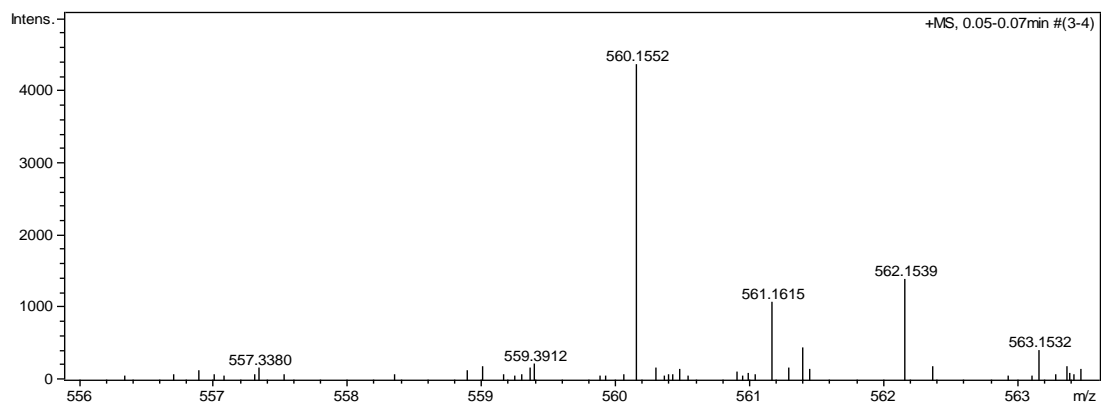

Methyl

*rel-*

**(3*S*,3'*R*)-1-butyl-5-chloro-1'-(4-methoxyphenyl)-6'-methyl-2,5',7'-trioxo-1',2',3',5',6',7'-hexahydrospiro[indoline-3,4'-pyrrolo[3,4-*b*]pyridine]-3'-carboxylate(3*c'*):**

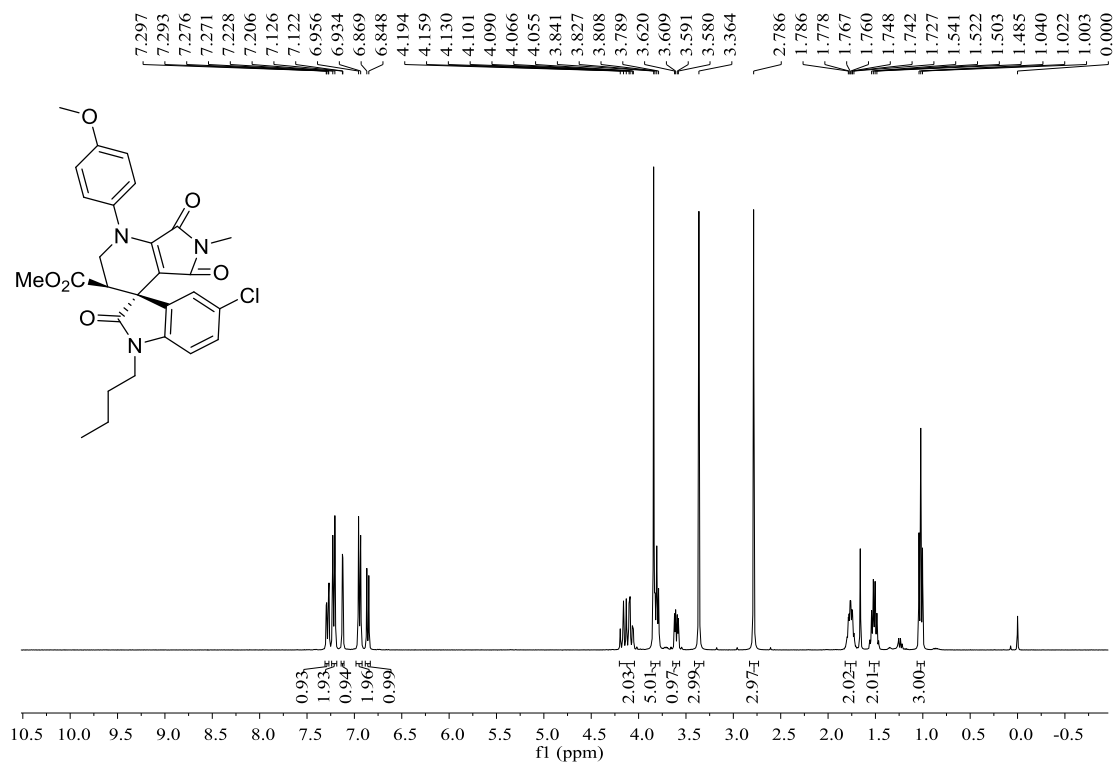

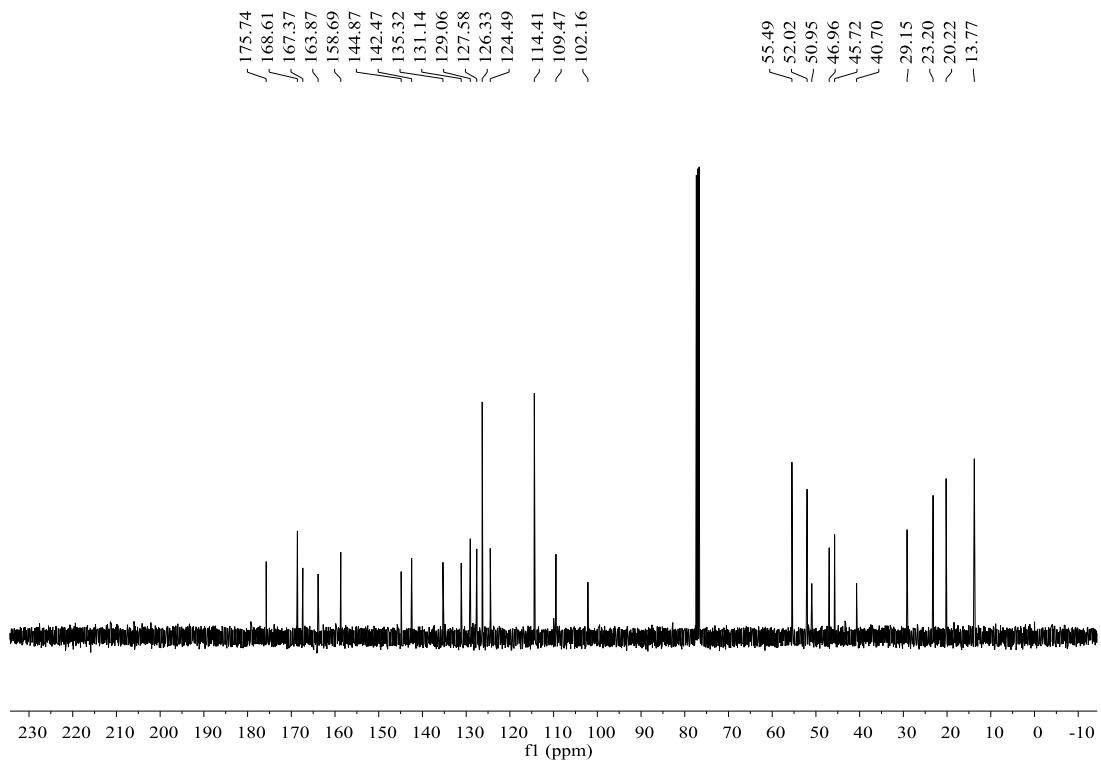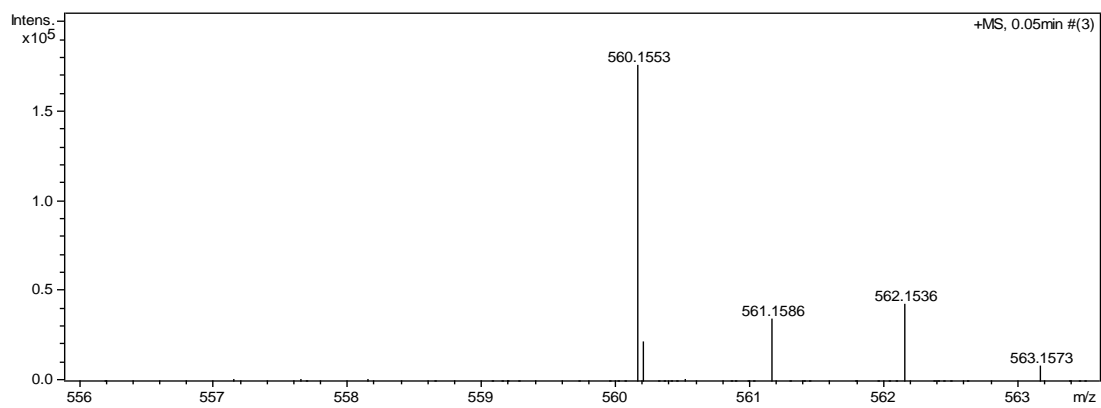

## Methyl

### *rel*-(3*R*,3'*R*)-1-butyl-5-chloro-1'-(4-chlorophenyl)-6'-methyl-2,5,7'-trioxo-1',2',3',5',6',7'-hexahydrospiro[indoline-3,4'-pyrrolo[3,4-*b*]pyridine]-3'-carboxylate (3d):

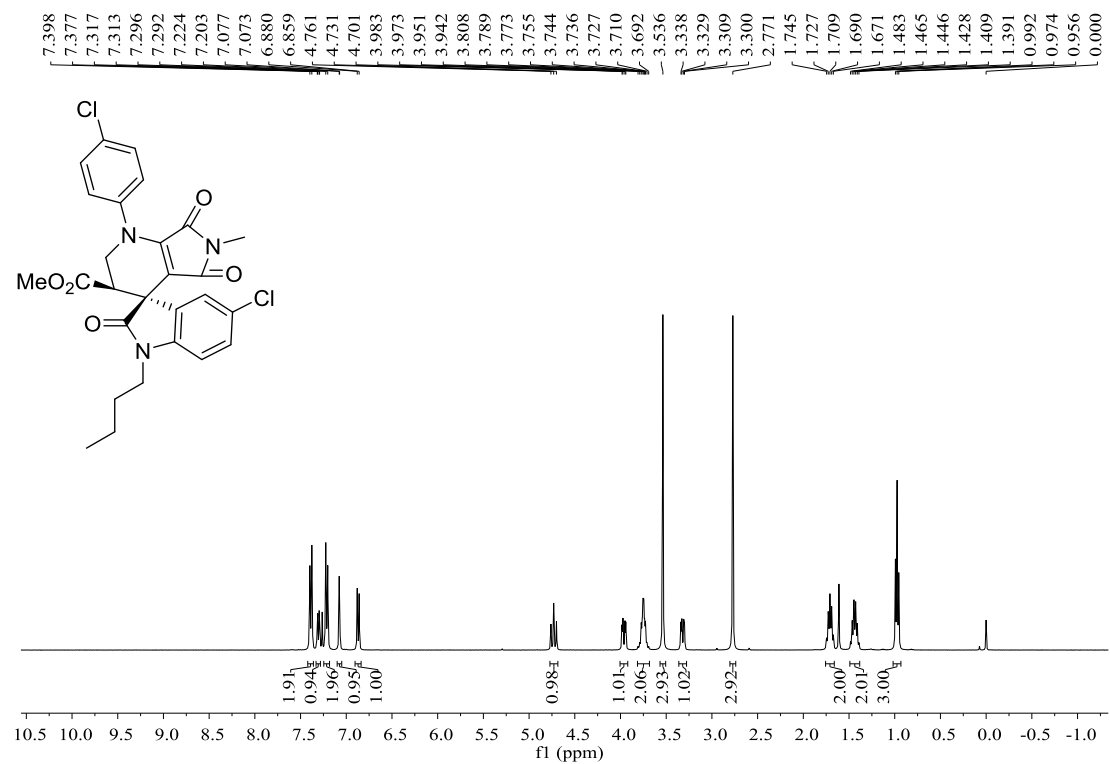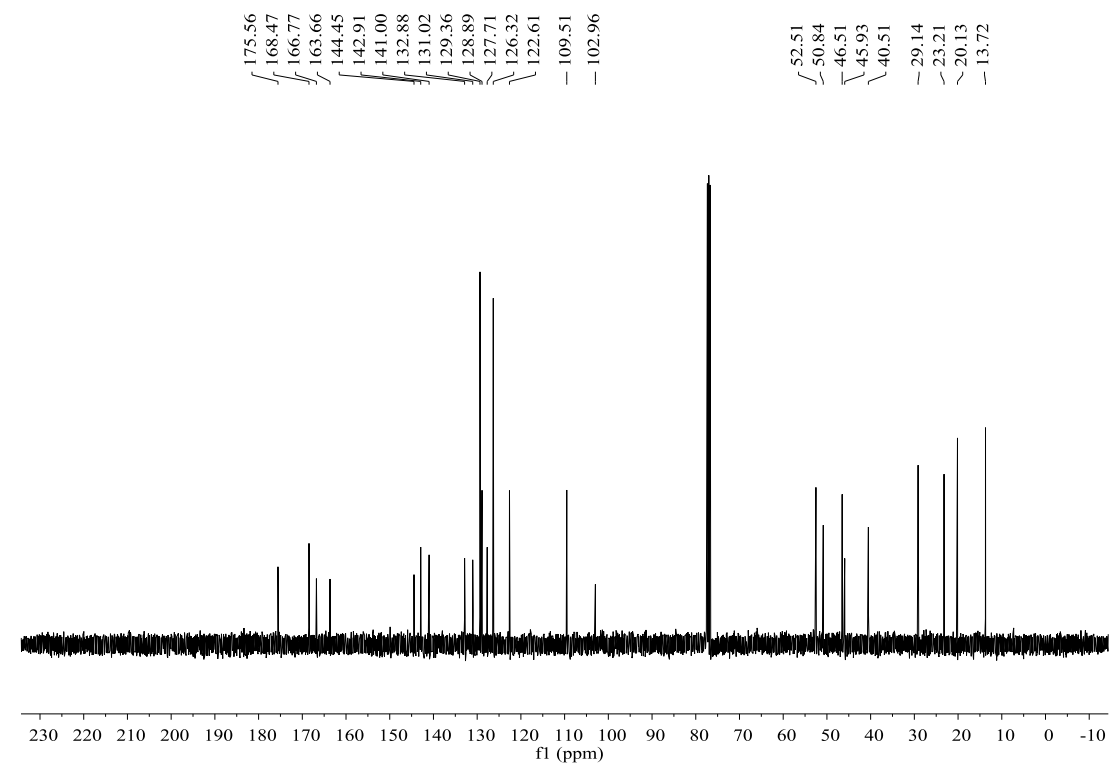

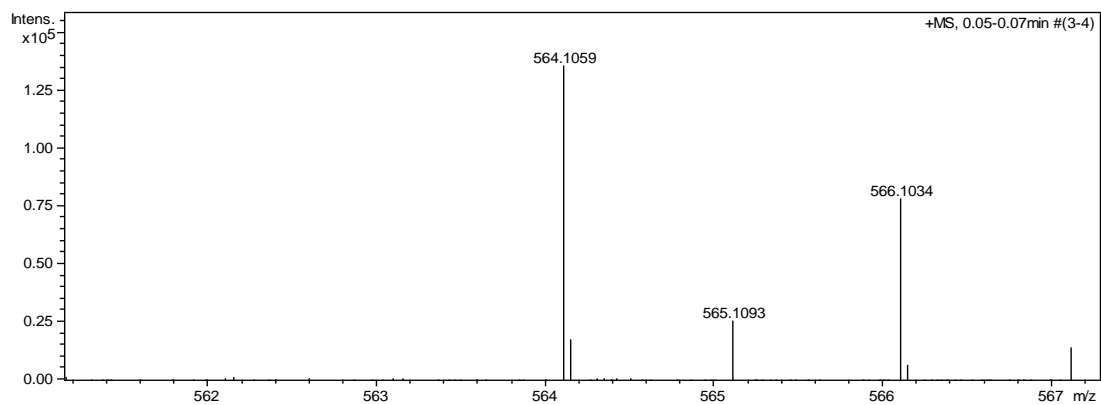

## Methyl

*rel*-(3*S*,3'*R*)-1-butyl-5-chloro-1'-(4-chlorophenyl)-6'-methyl-2,5,7'-trioxo-1',2',3',5',6',7'-hexahydrospiro[indoline-3,4'-pyrrolo[3,4-*b*]pyridine]-3'-carboxylate (**3d'**):

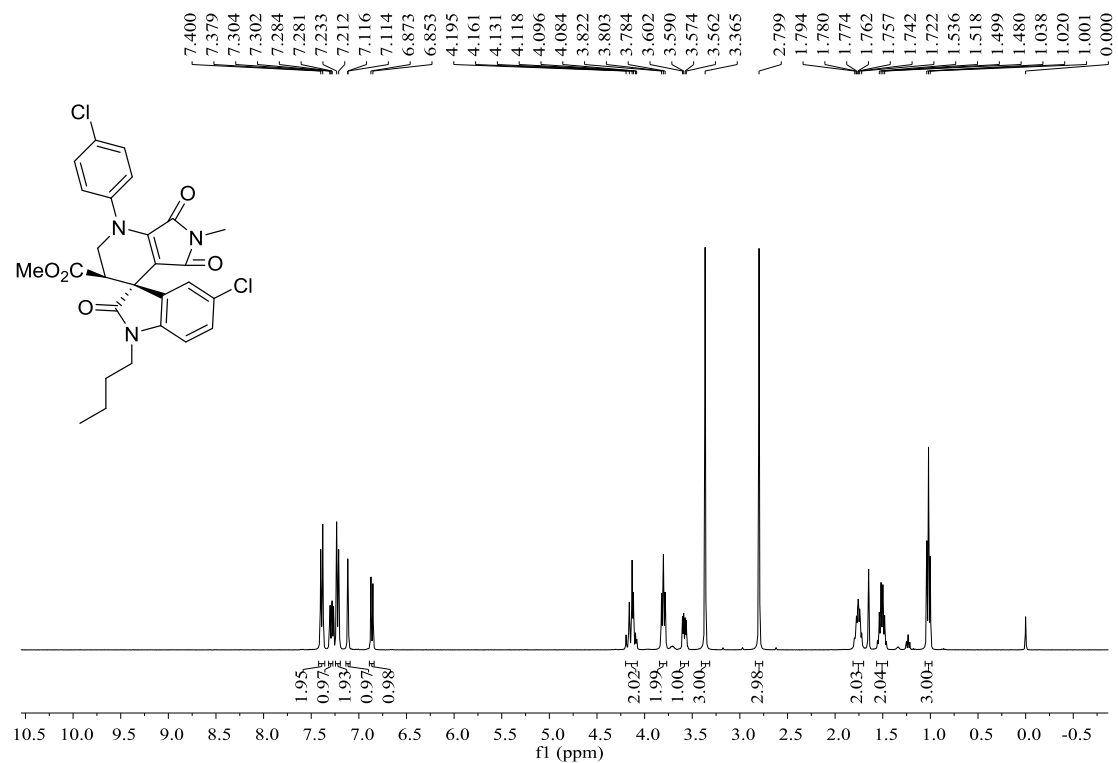

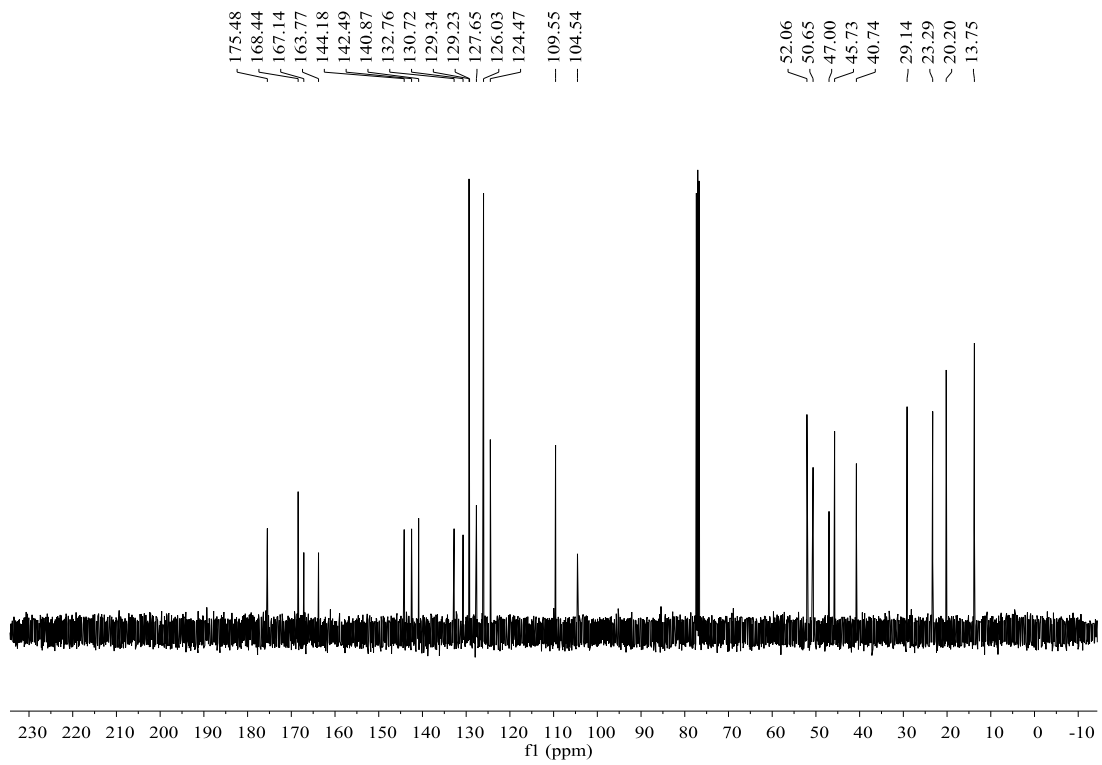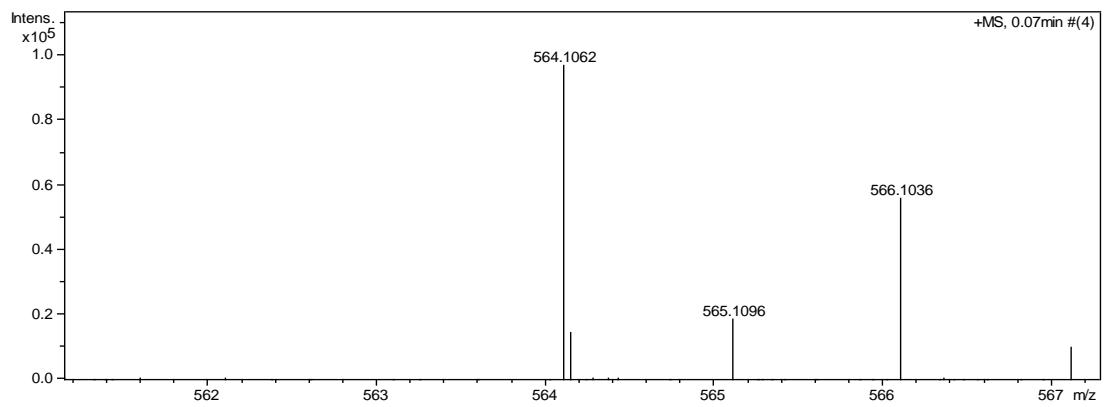

## Methyl

*rel*-(3*R*,3'*R*)-1-benzyl-6'-methyl-2,5,7'-trioxo-1'-phenyl-1',2',3',5',6',7'-hexahydrospiro[indoline-3,4'-pyrrolo[3,4-*b*]pyridine]-3'-carboxylate (3e):

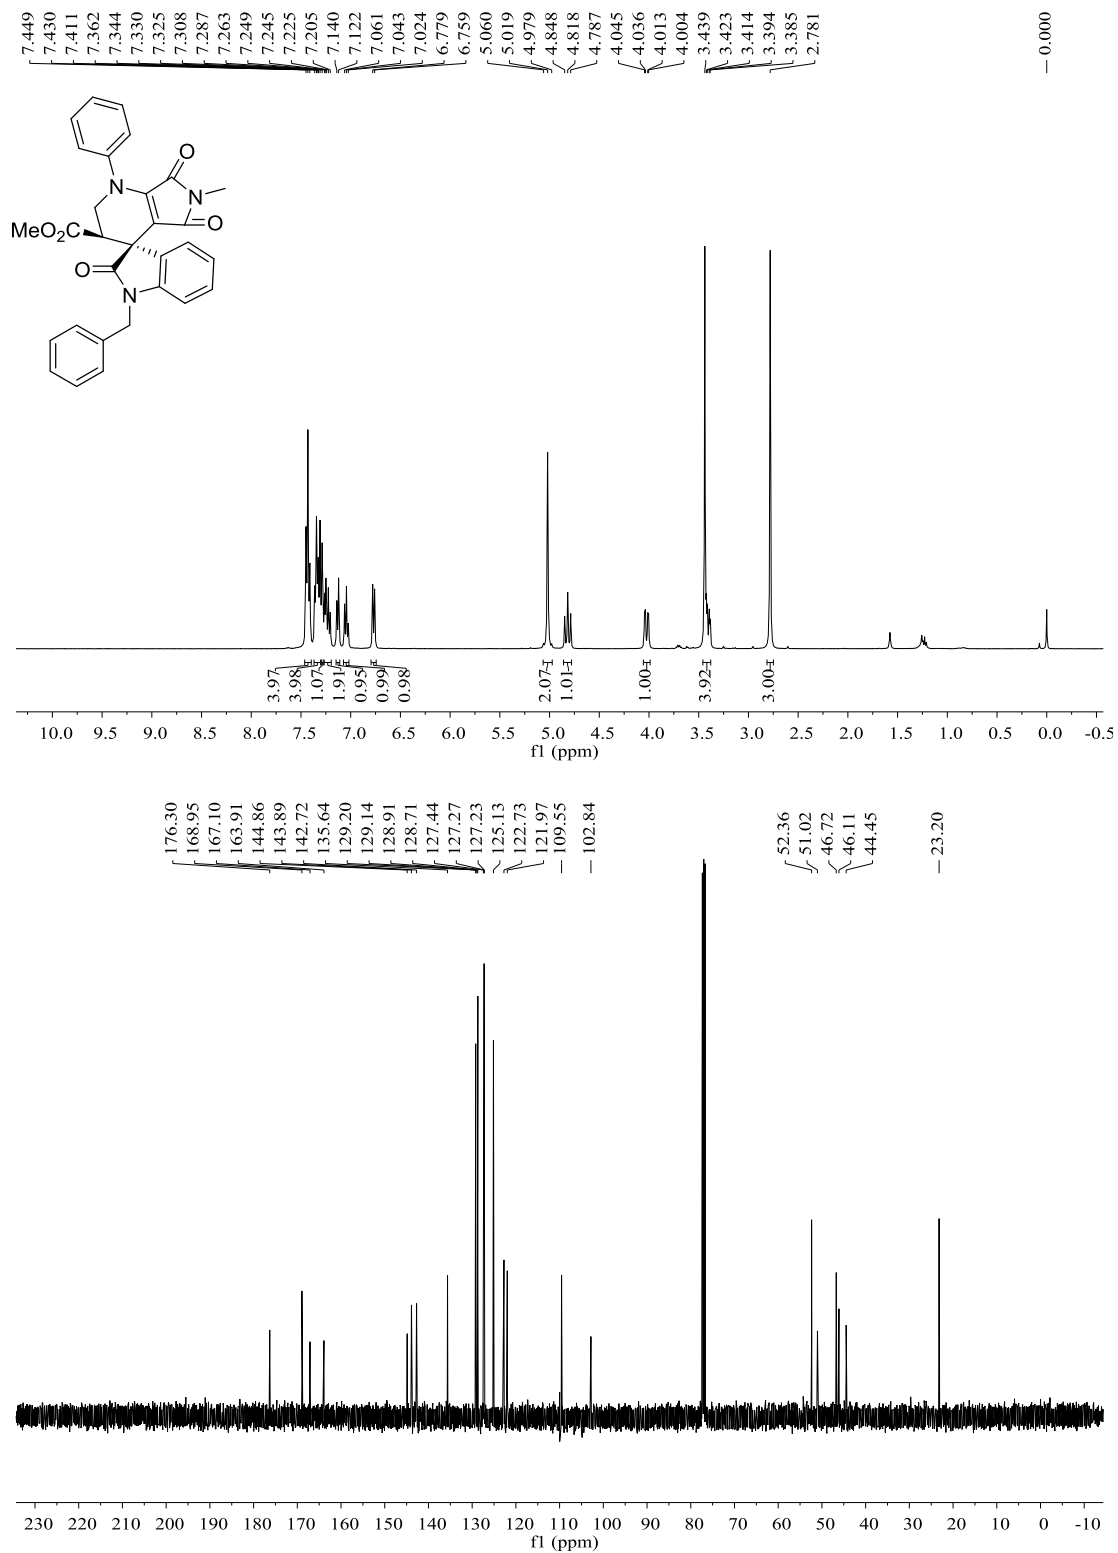



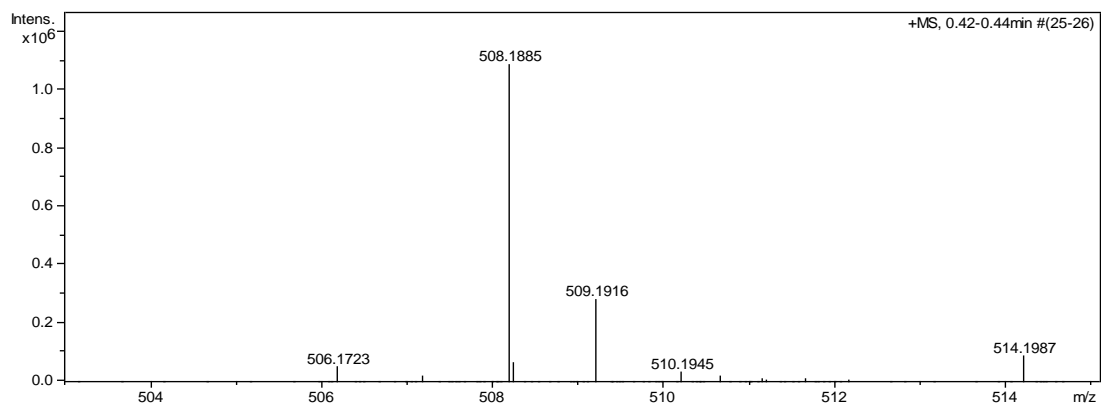

## Methyl

***rel*-(3*S*,3'*R*)-1-benzyl-6'-methyl-2,5',7'-trioxo-1'-phenyl-1',2',3',5',6',7'-hexahydrospiro[indoline-3,4'-pyrrolo[3,4-*b*]pyridine]-3'-carboxylate (**3e**):**

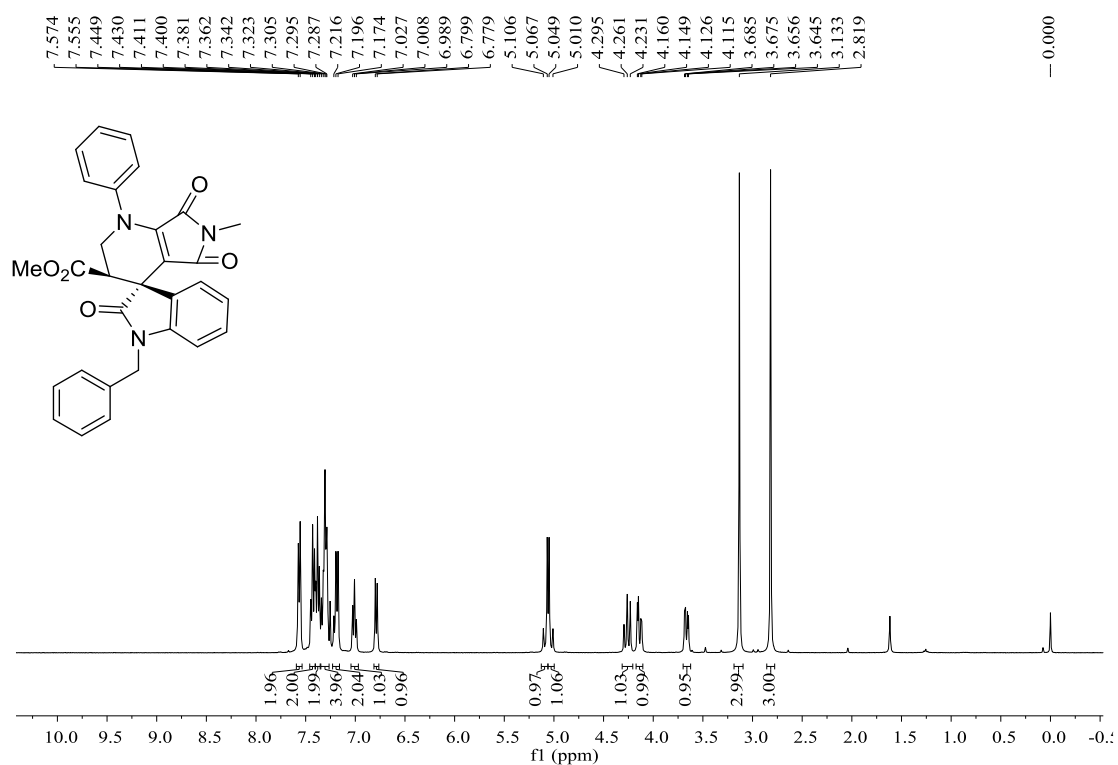

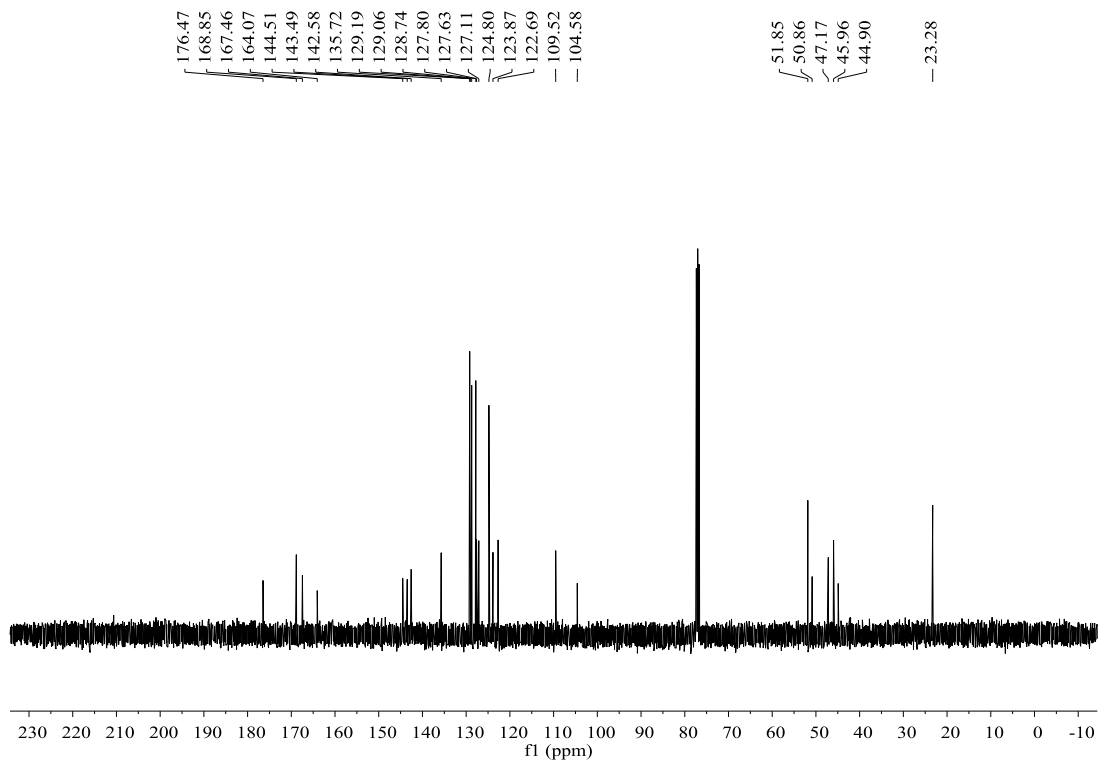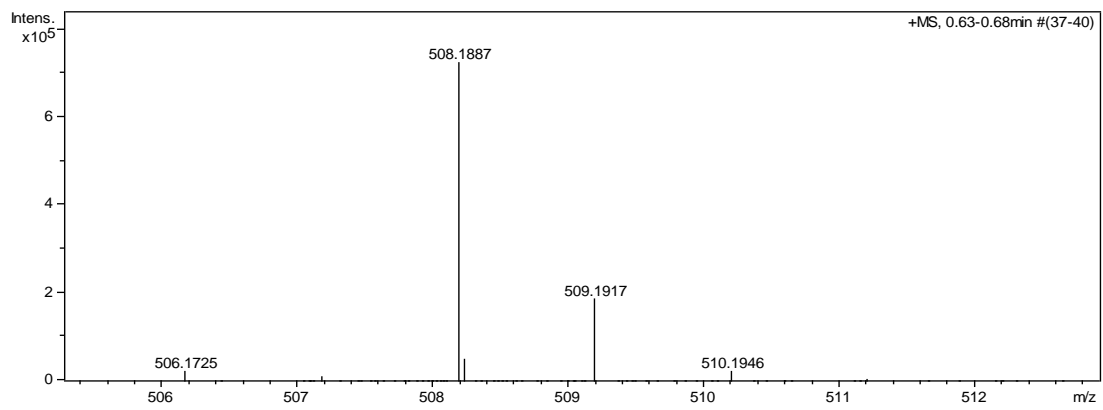

## Methyl

### *rel*-(3*R*,3'*R*)-1-benzyl-6'-methyl-2,5,7'-trioxo-1'-(*p*-tolyl)-1',2',3',5',6',7'-hexahydrospiro[indoline-3,4'-pyrrolo[3,4-*b*]pyridine]-3'-carboxylate (3f):

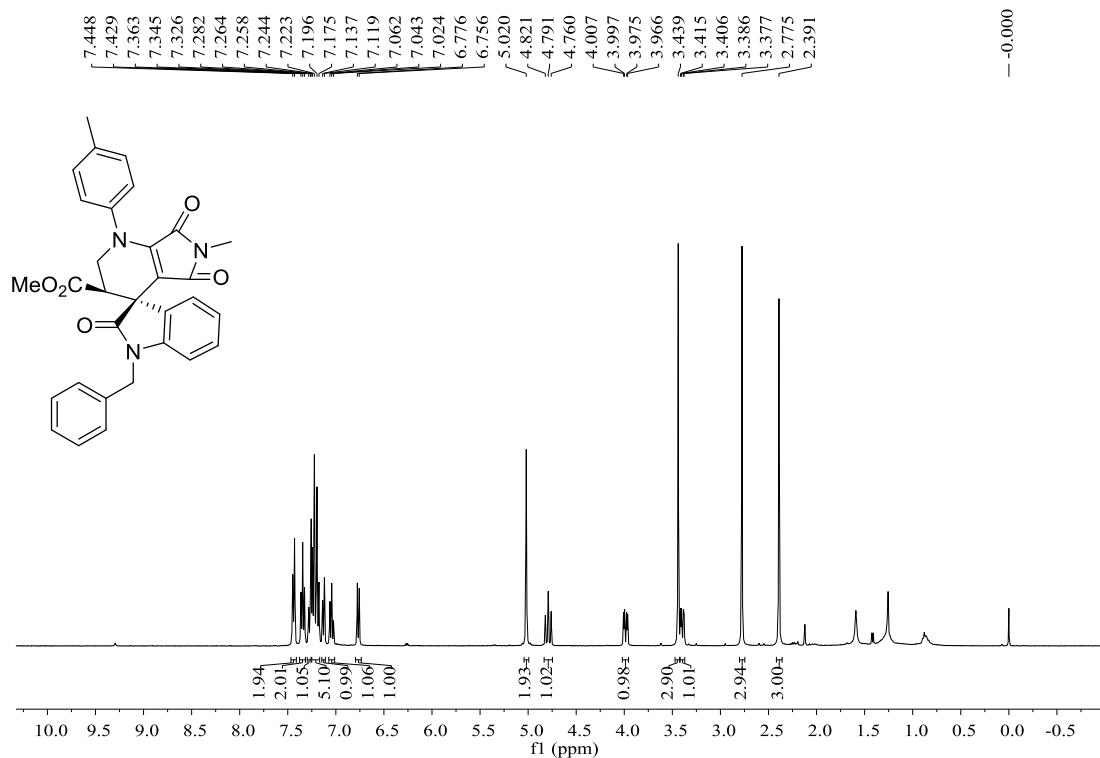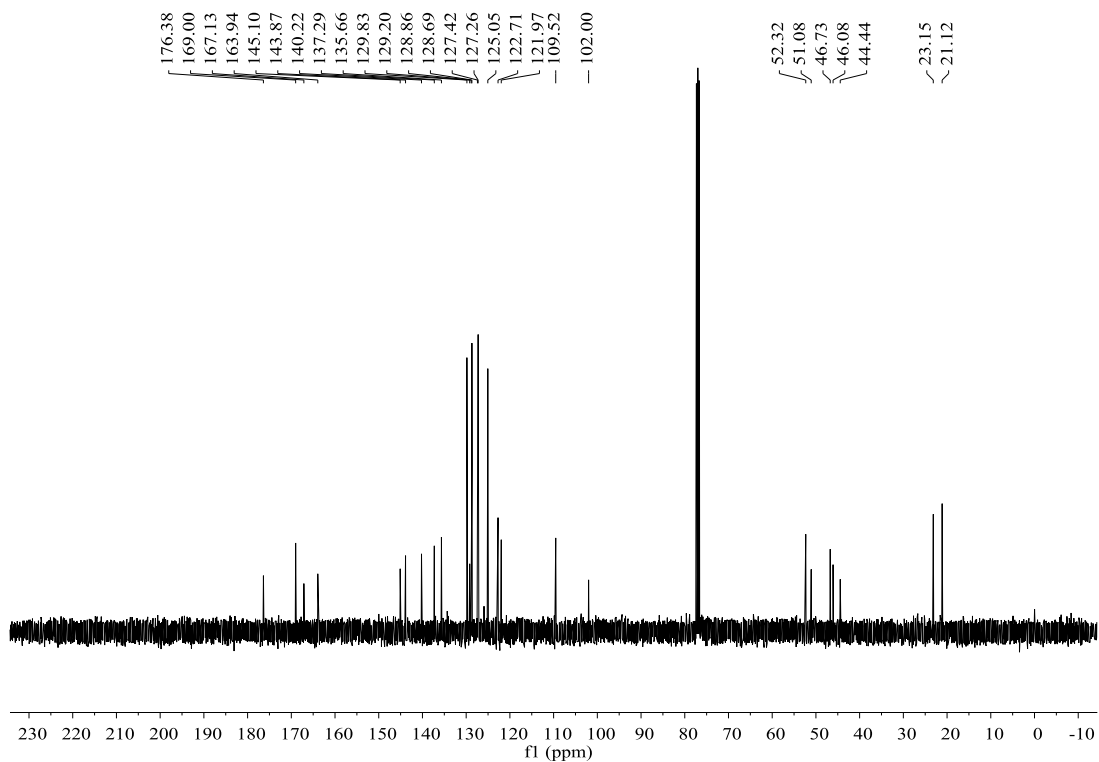

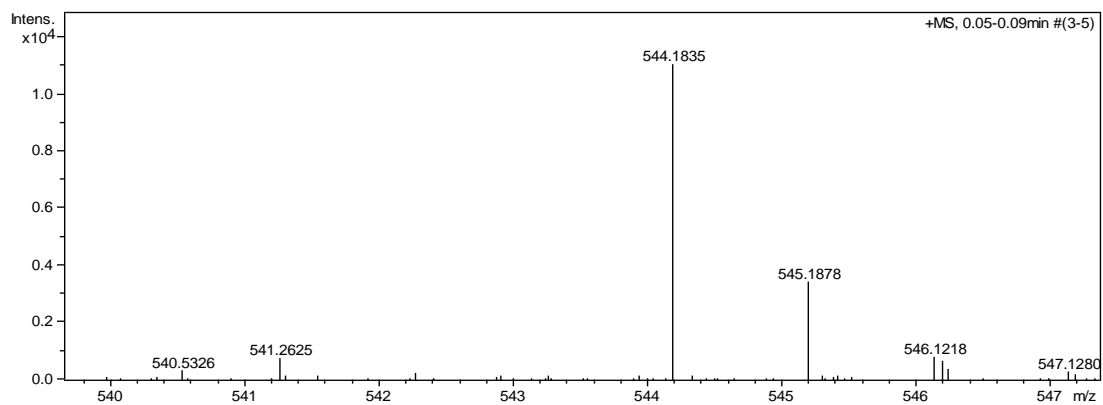

## Methyl

*rel*-(3*S*,3'*R*)-1-benzyl-6'-methyl-2,5,7'-trioxo-1'-(*p*-tolyl)-1',2',3',5',6',7'-hexahydrospiro[indoline-3,4'-pyrrolo[3,4-*b*]pyridine]-3'-carboxylate (3f')

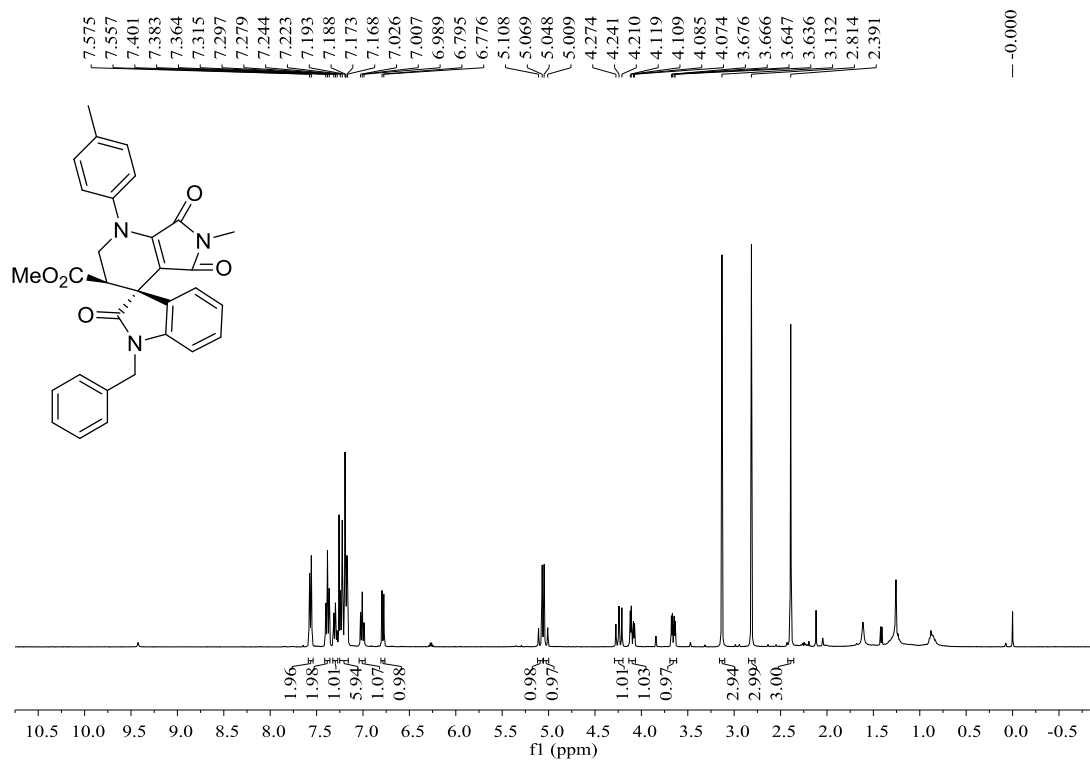

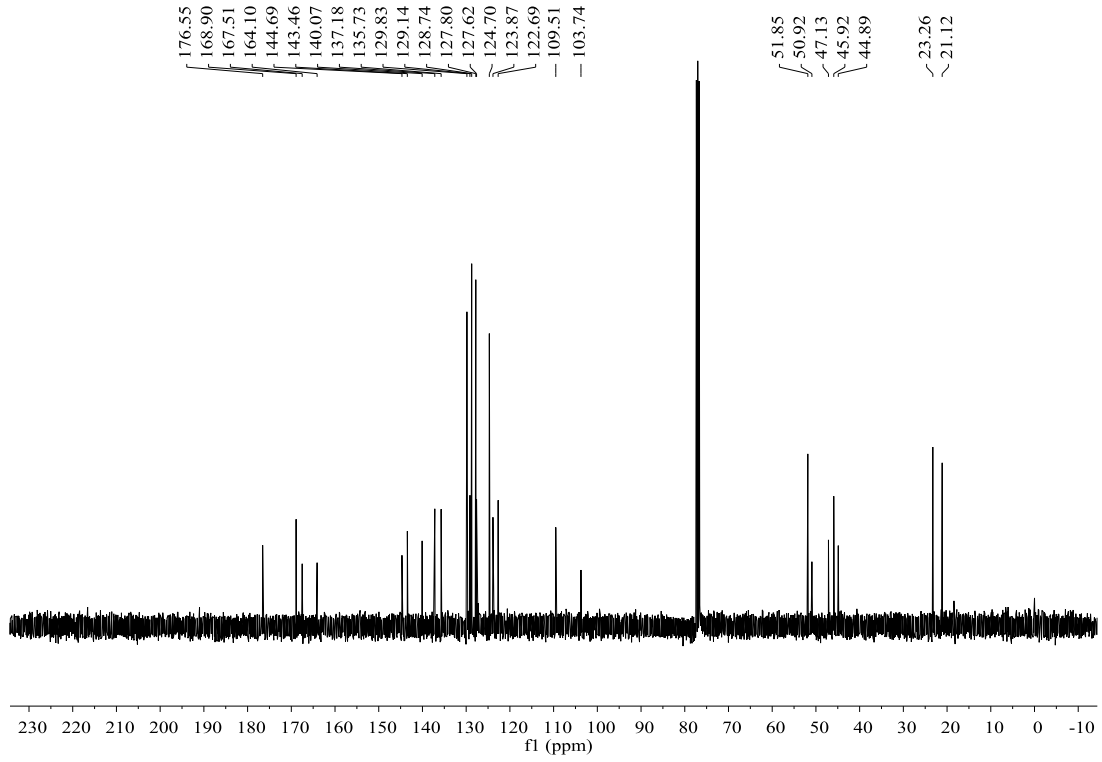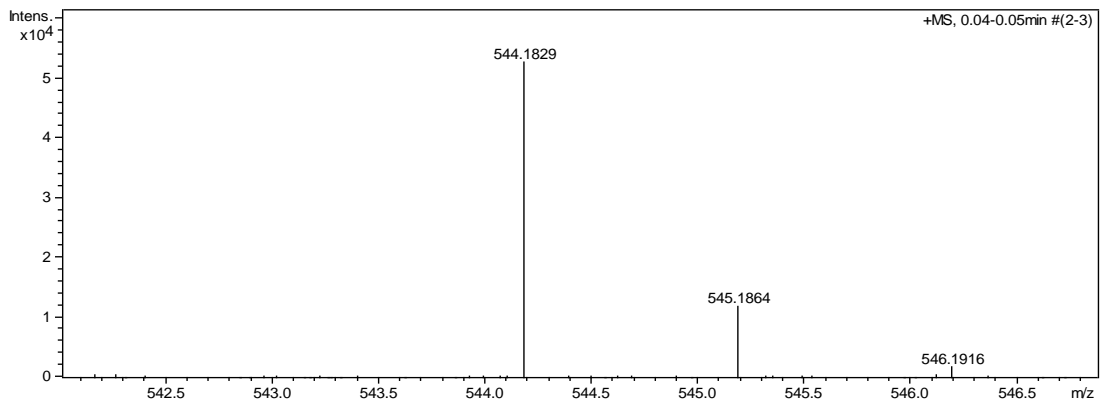

## Methyl

*rel*-(3*R*,3'*R*)-1-benzyl-1'-(4-methoxyphenyl)-6'-methyl-2,5',7'-trioxo-1',2',3',5',6',7'-hexahydrospiro[indoline-3,4'-pyrrolo[3,4-*b*]pyridine]-3'-carboxylate (**3g**):

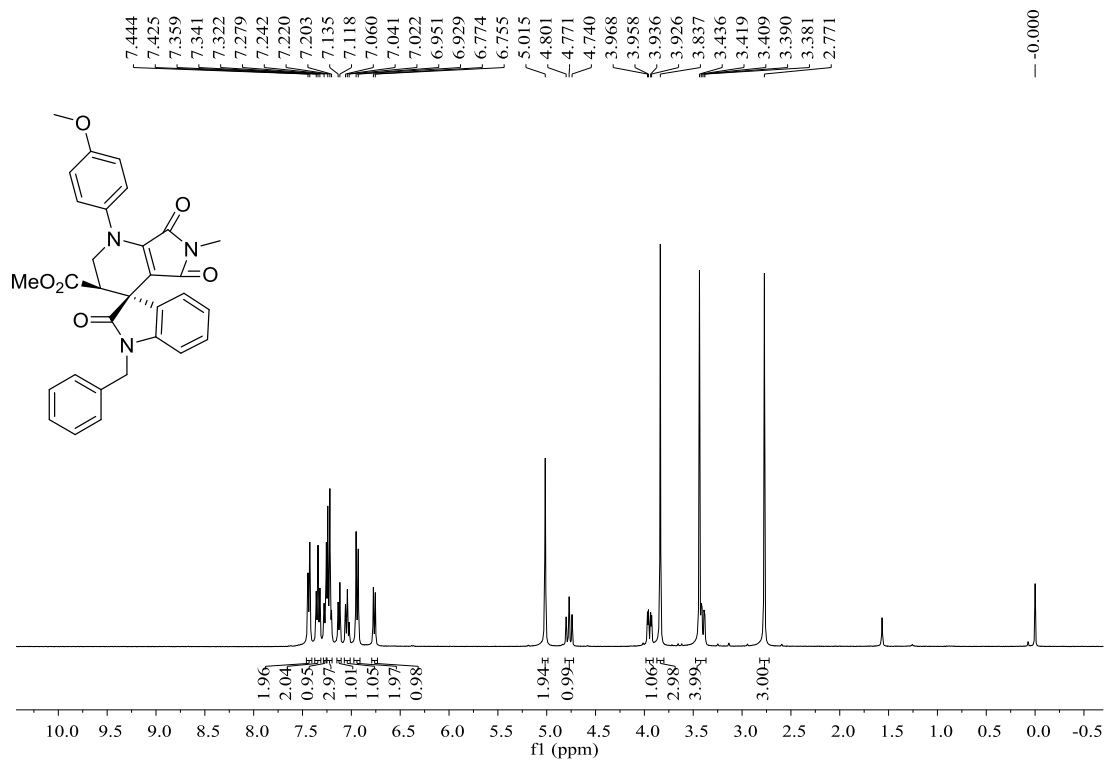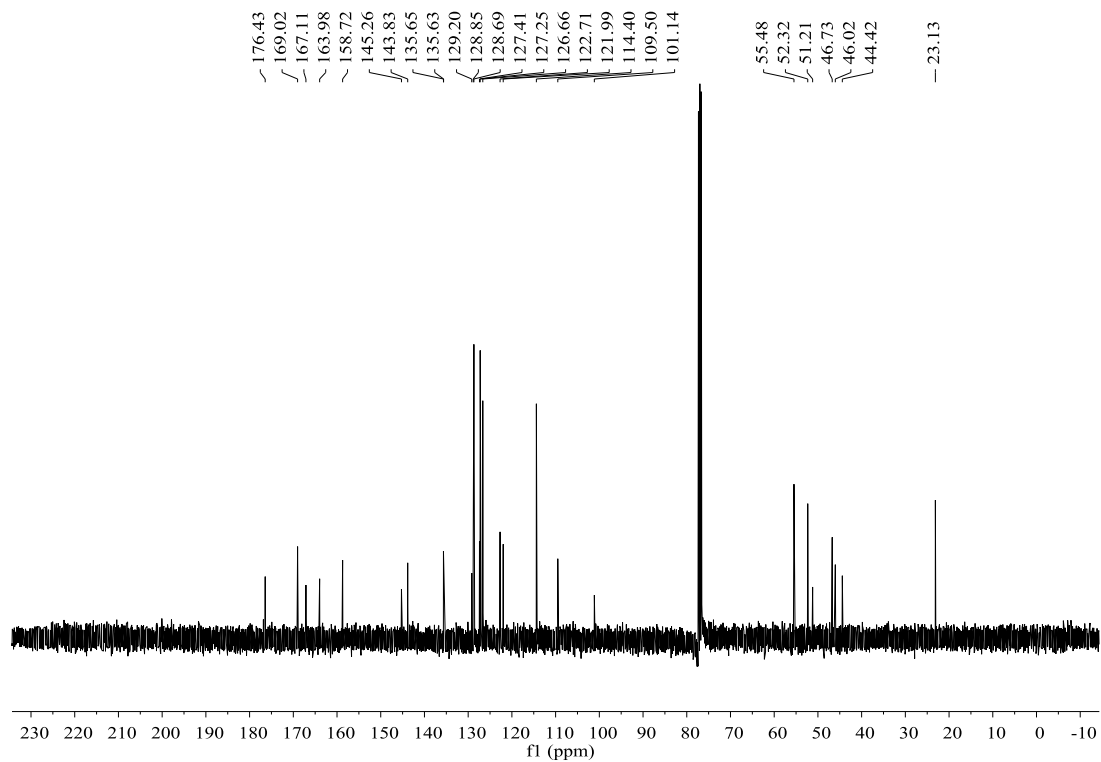

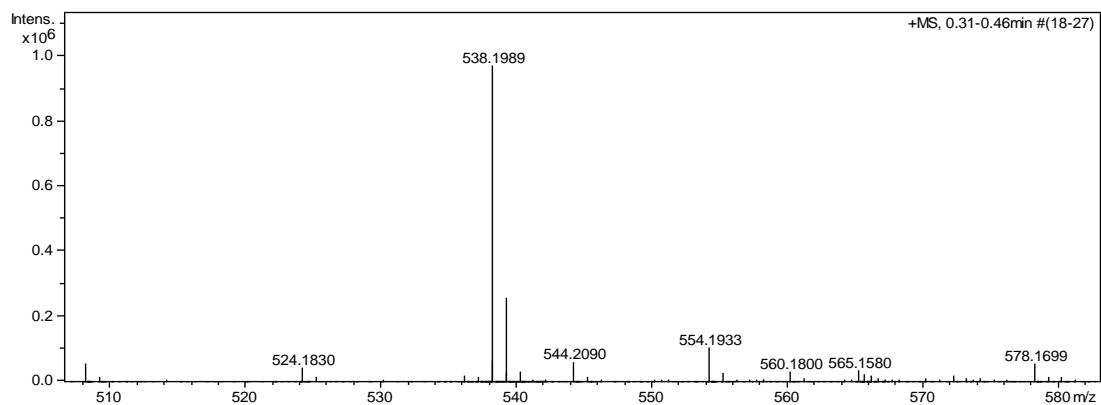

## Methyl

*rel*-(3*S*,3'*R*)-1-benzyl-1'-(4-methoxyphenyl)-6'-methyl-2,5,7'-trioxo-1',2',3',5',6',7'-hexahydrospiro[indoline-3,4'-pyrrolo[3,4-*b*]pyridine]-3'-carboxylate (**3g'**):

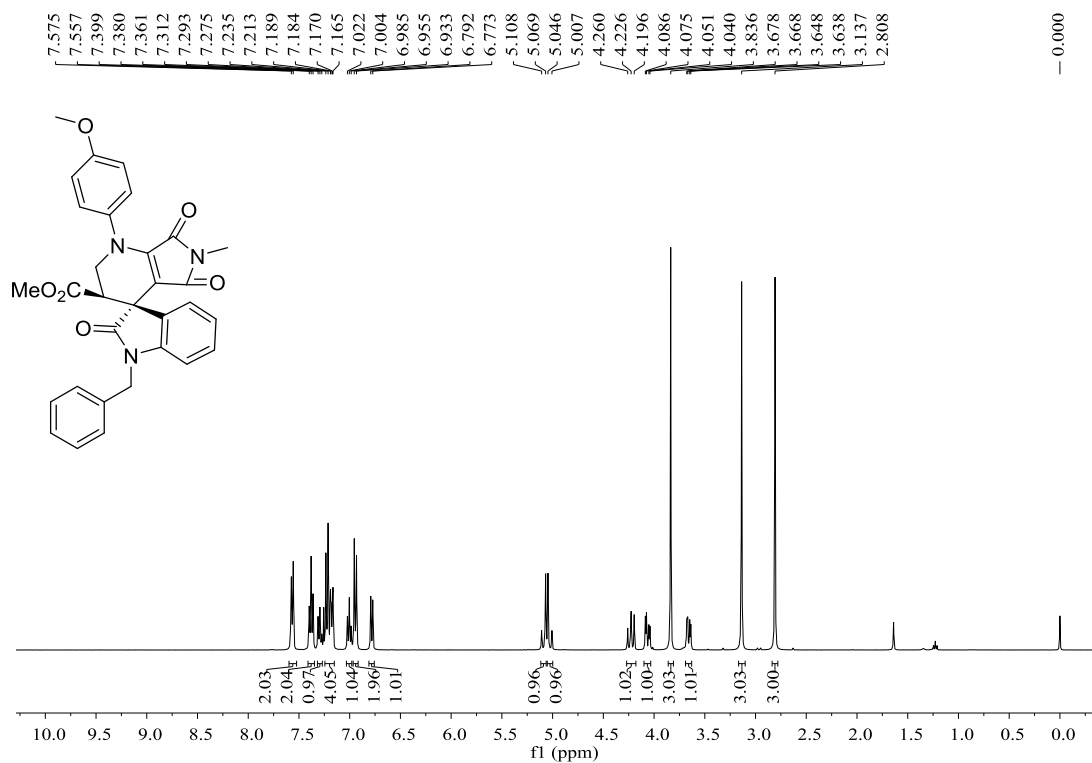

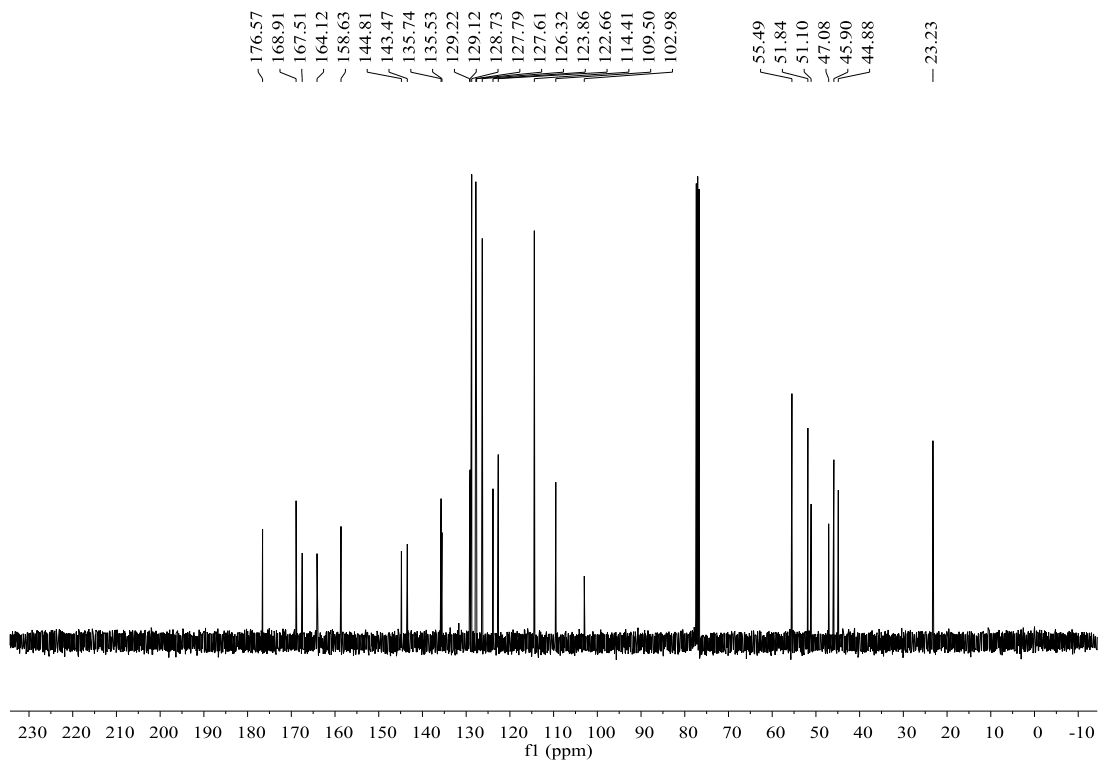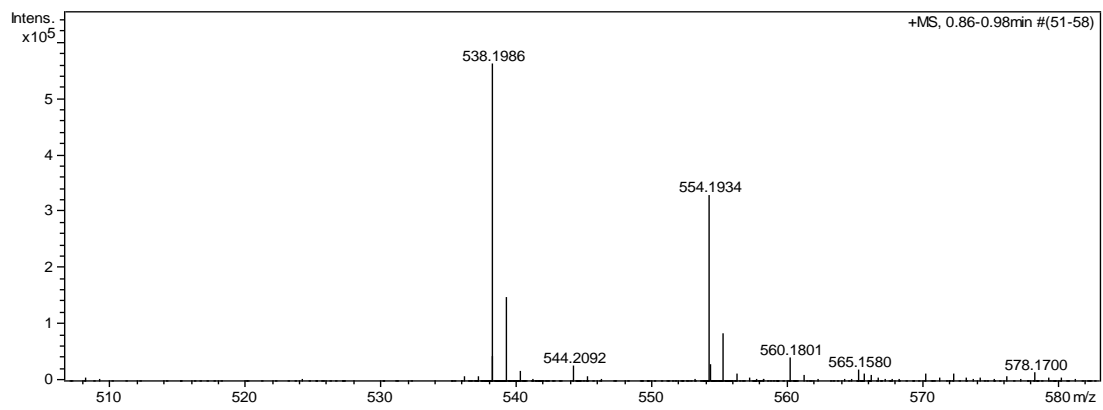



# Methyl

*rel*-(3*R*,3'*R*)-1-benzyl-1'-(4-chlorophenyl)-6'-methyl-2,5',7'-trioxo-1,2',3',5',6',7'-hexahydros piro[indoline-3,4'-pyrrolo[3,4-*b*]pyridine]-3'-carboxylate (3h):

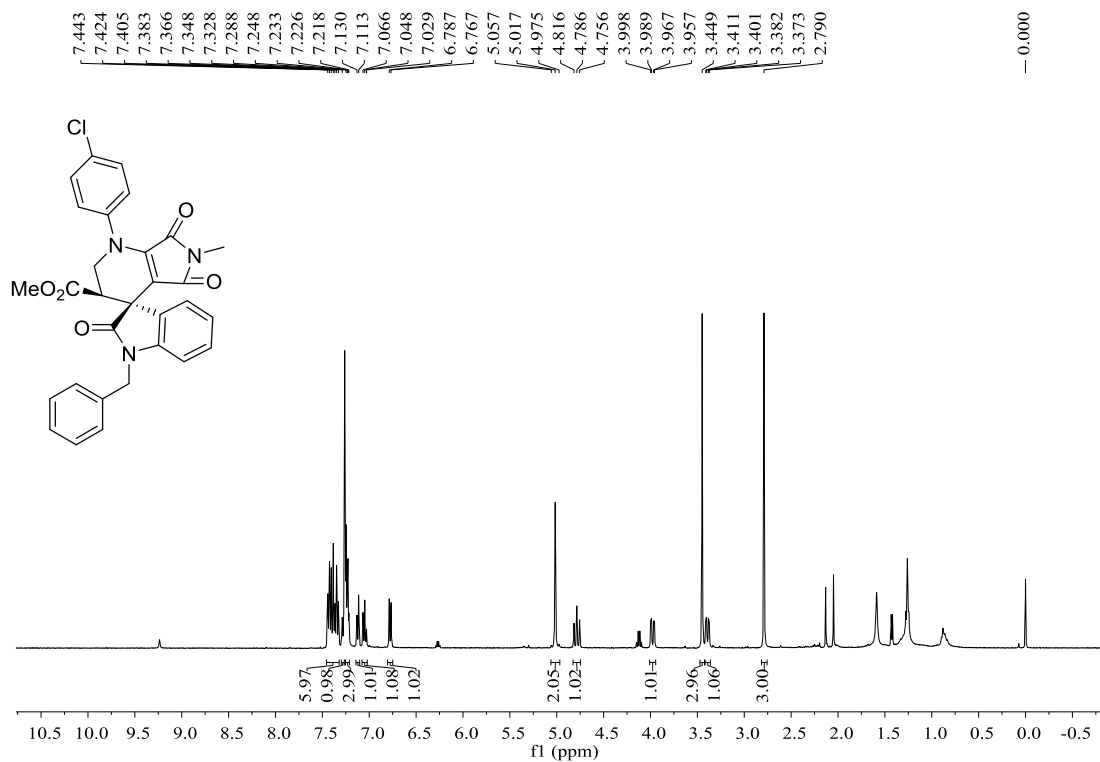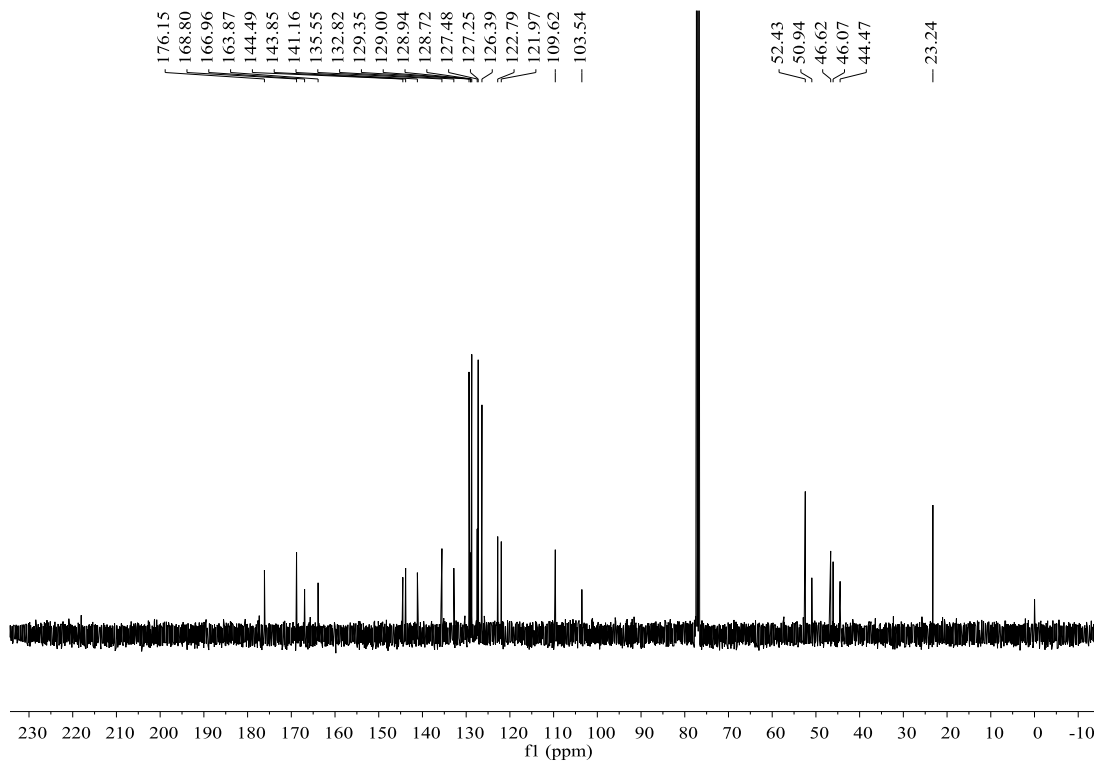

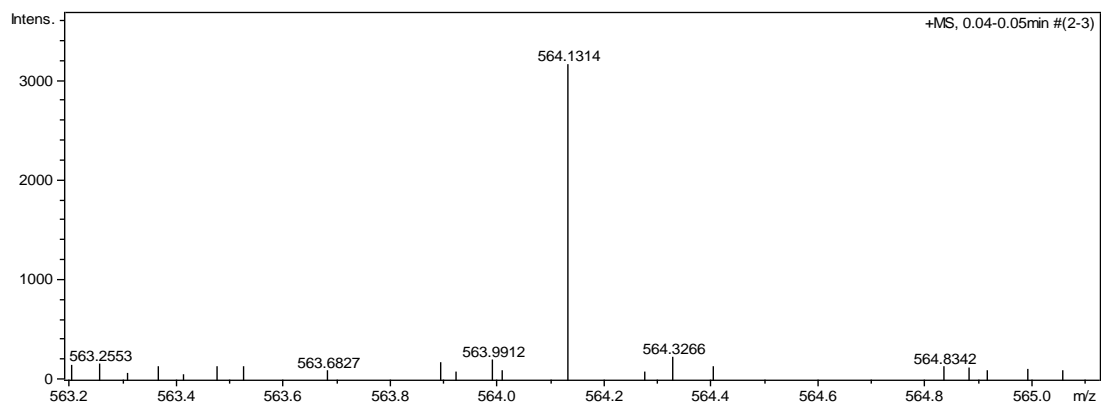

### Methyl

***rel*-(3*S*,3'*R*)-1-benzyl-1'-(4-chlorophenyl)-6'-methyl-2,5',7'-trioxo-1,2',3',5',6',7'-hexahydrospiro[indoline-3,4'-pyrrolo[3,4-*b*]pyridine]-3'-carboxylate (3h')**

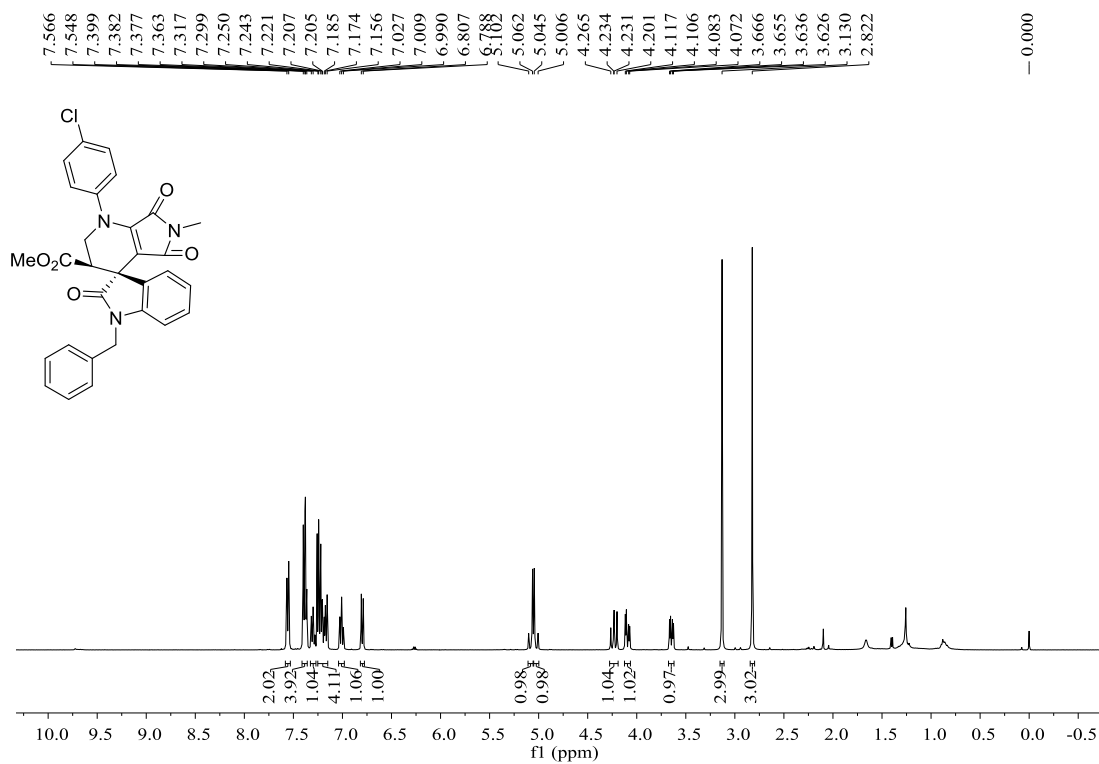

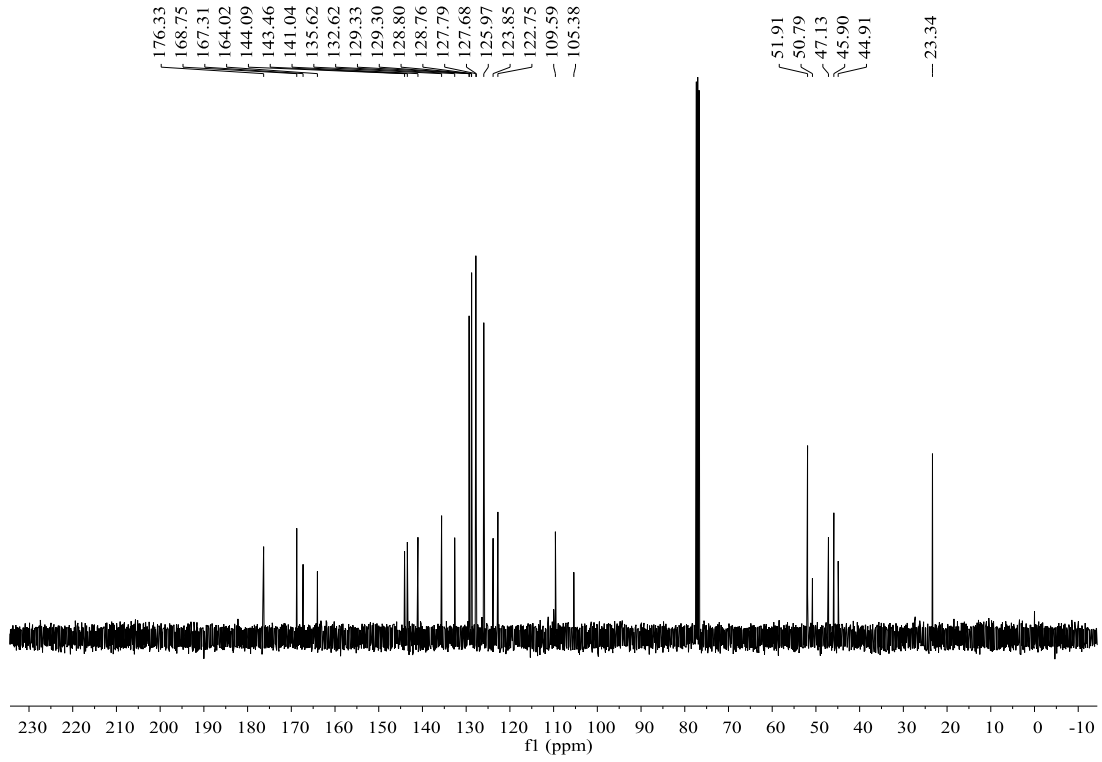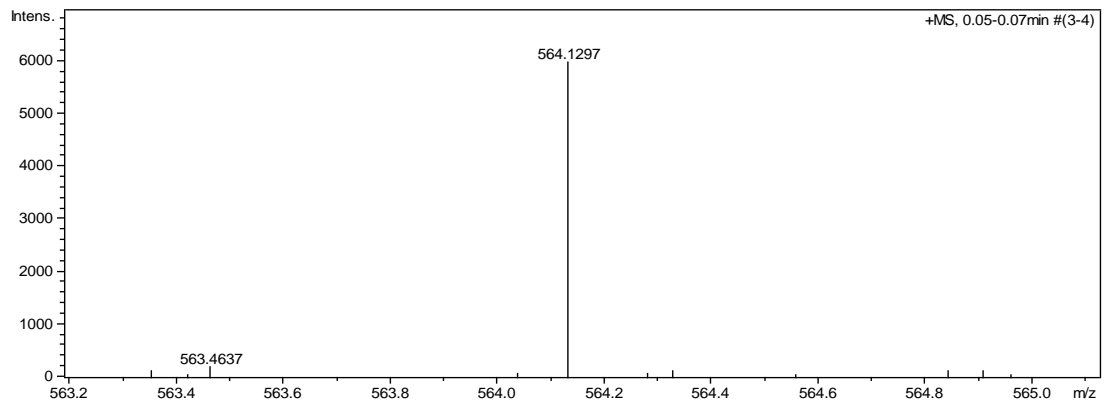

## Methyl

*rel*-(3*R*,3'*R*)-1-benzyl-5,6'-dimethyl-2,5,7'-trioxo-1'-(*p*-tolyl)-1',2',3',5',6',7'-hexahydrospiro[*indoline*-3,4'-pyrrolo[3,4-*b*]pyridine]-3'-carboxylate (3i):

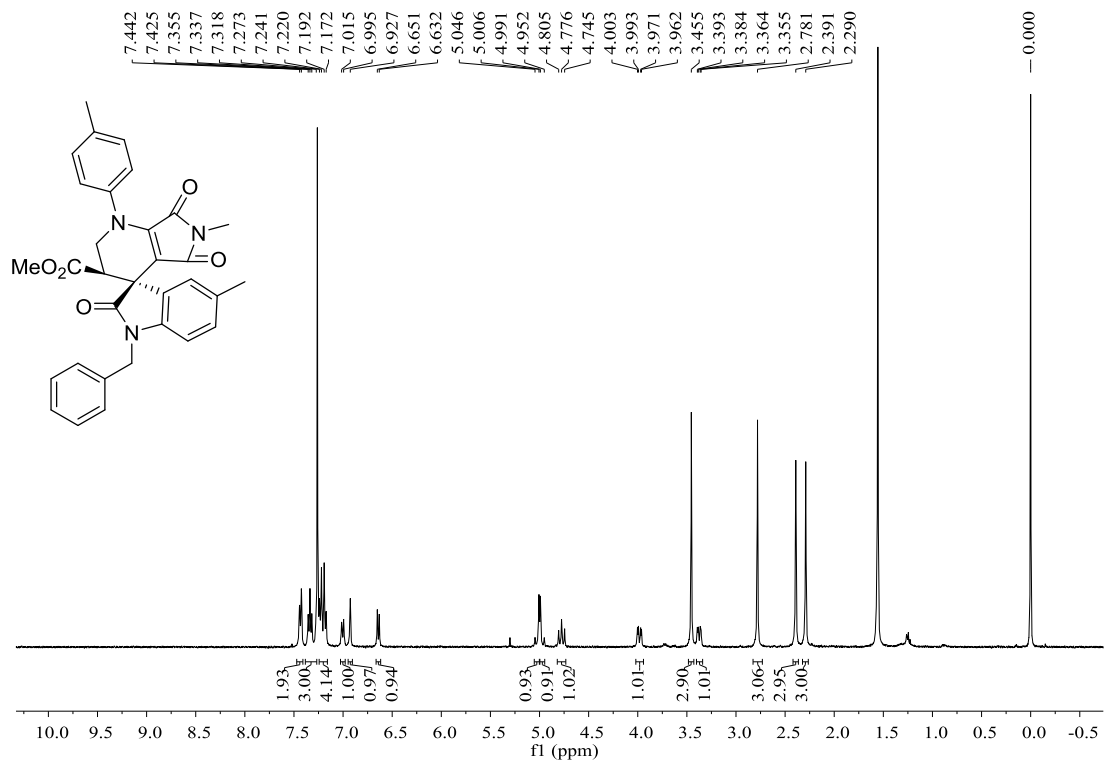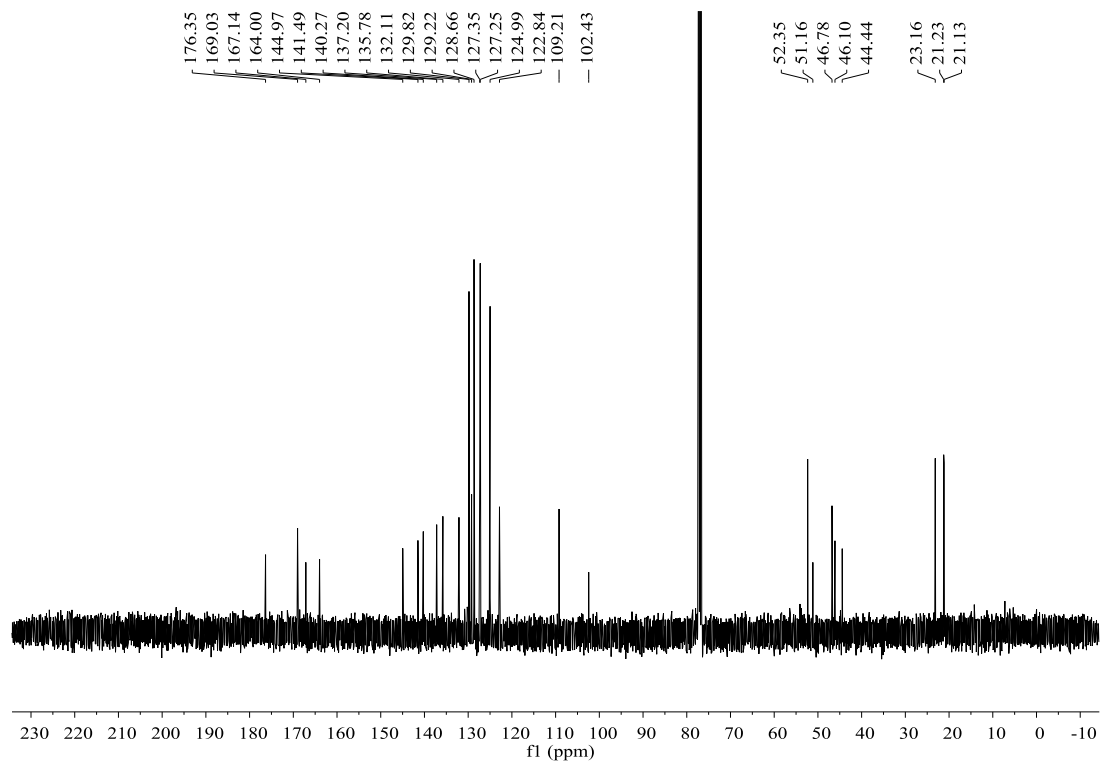

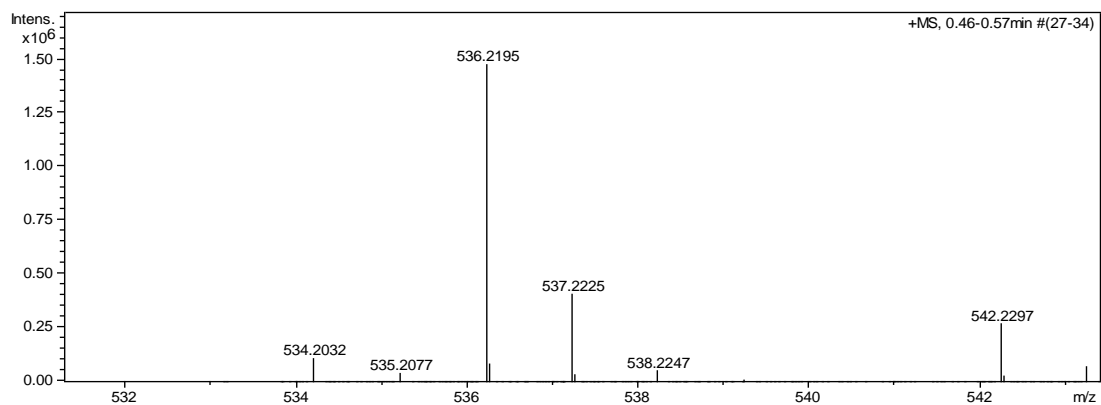

### Methyl

***rel*-(3*S*,3'*R*)-1-benzyl-5,6'-dimethyl-2,5',7'-trioxo-1'-(*p*-tolyl)-1',2',3',5',6',7'-hexahydrospiro[indoline-3,4'-pyrrolo[3,4-*b*]pyridine]-3'-carboxylate (3i')**:

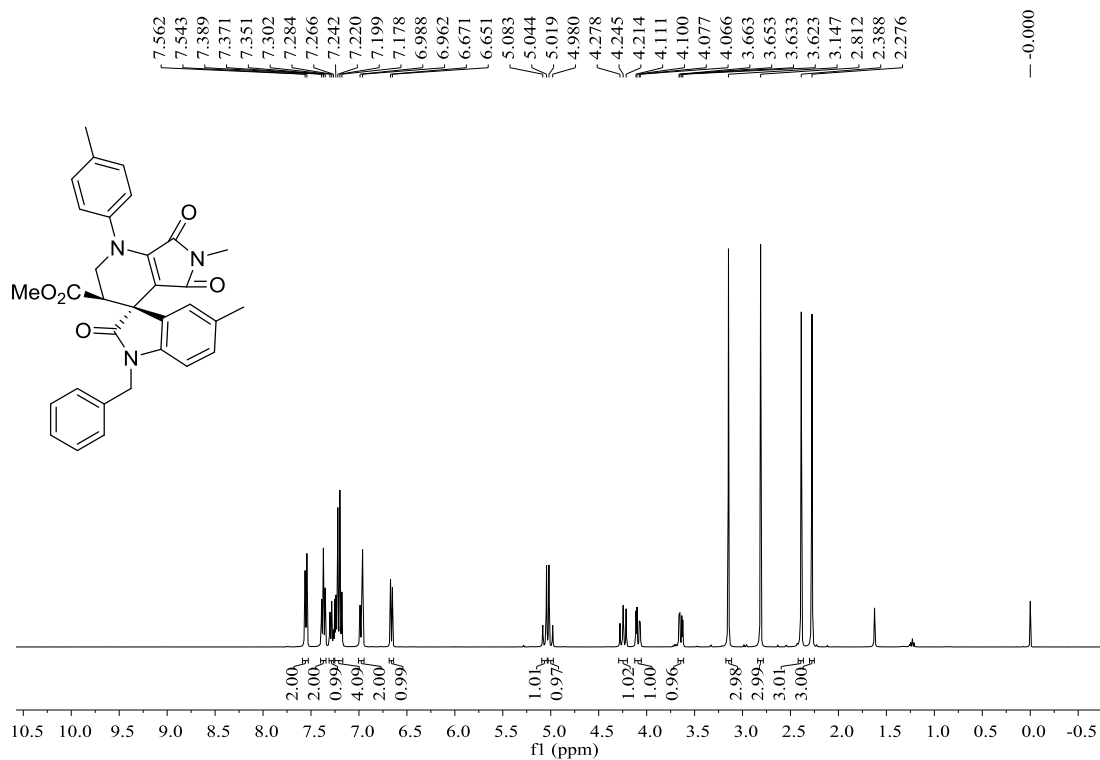

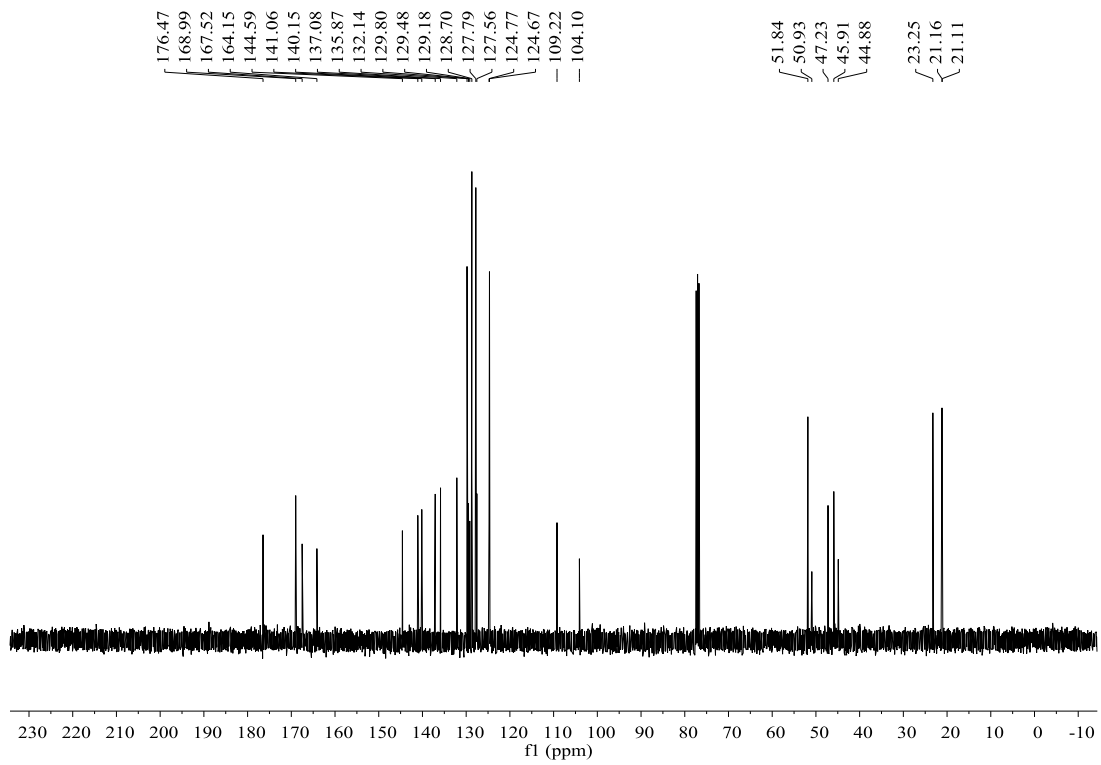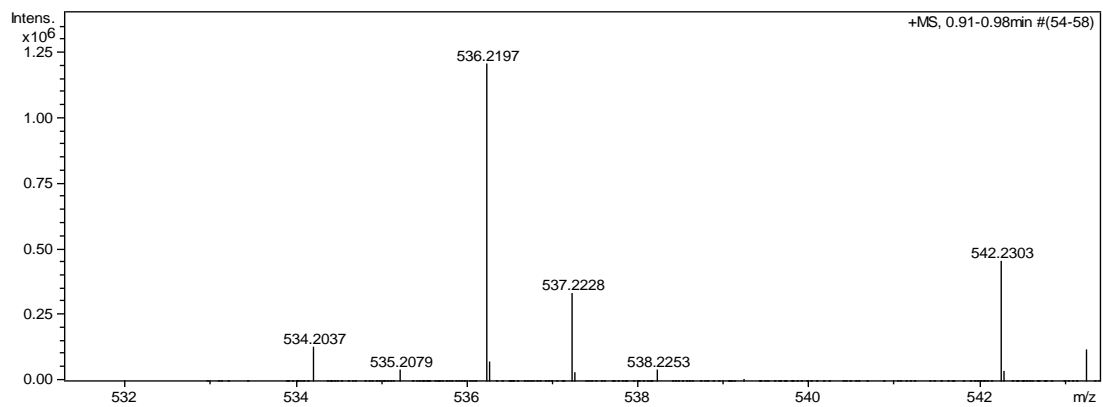

# Methyl

## *rel*-(3*R*,3'*R*)-1-benzyl-1'-(4-methoxyphenyl)-5,6'-dimethyl-2,5',7'-trioxo-1',2',3',5',6',7'-hexahydrospiro[indoline-3,4'-pyrrolo[3,4-*b*]pyridine]-3'-carboxylate (3j):

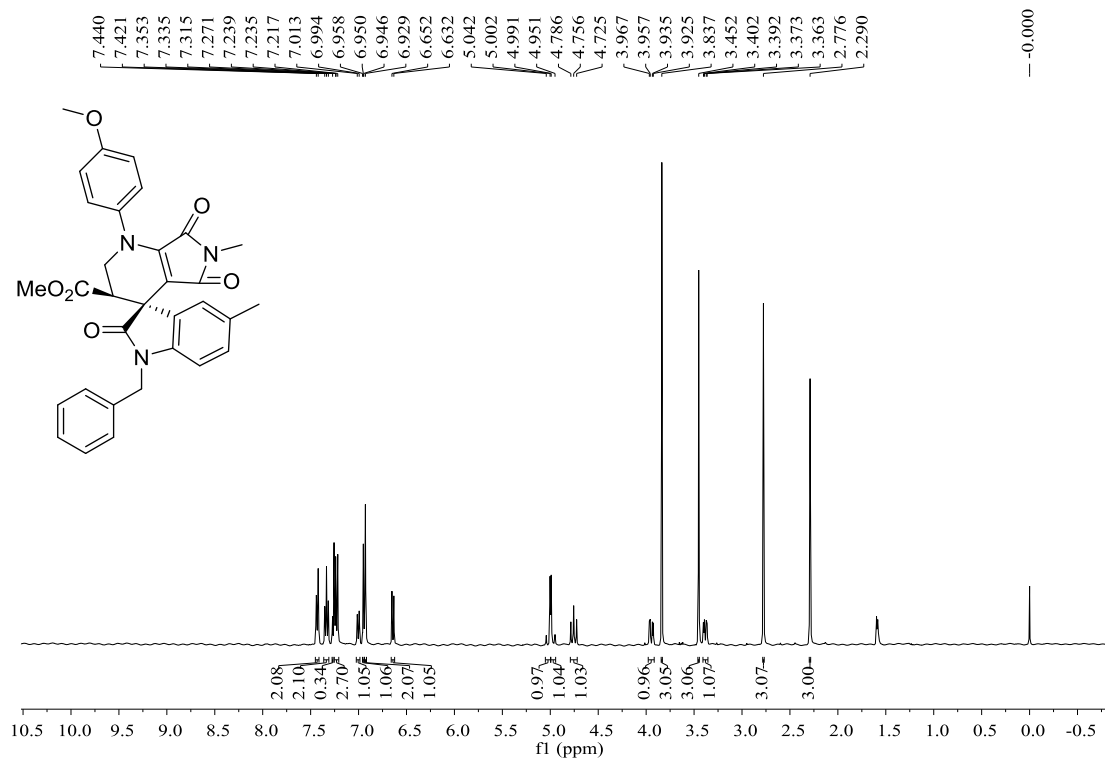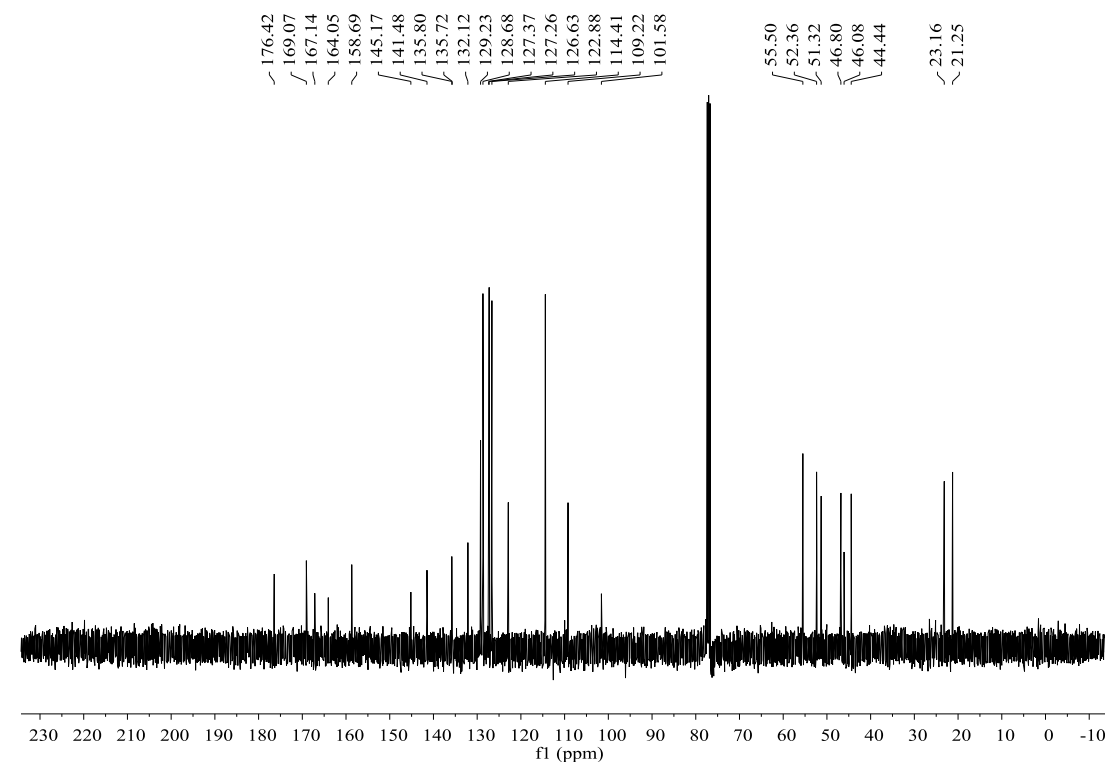

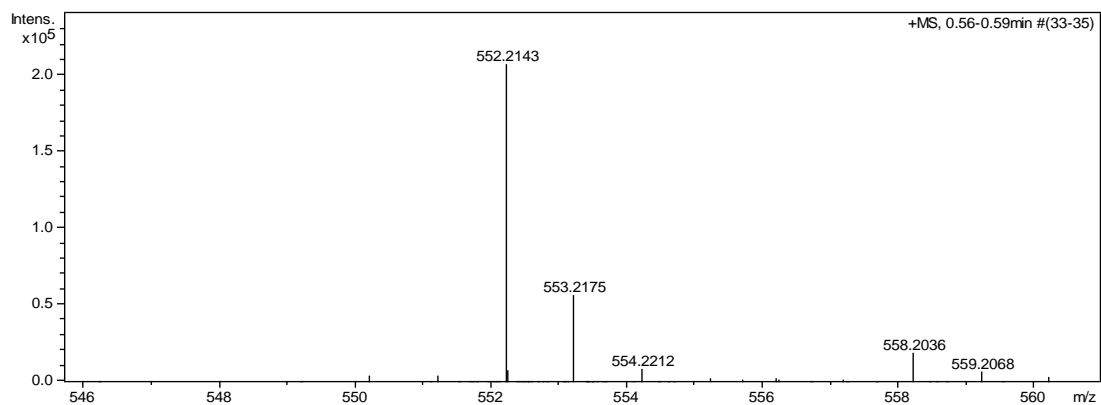

## Methyl

*rel*-(3*S*,3'*R*)-1-benzyl-1'-(4-methoxyphenyl)-5,6'-dimethyl-2,5',7'-trioxo-1,2',3',5',6',7'-hexahydrospiro[indoline-3,4'-pyrrolo[3,4-*b*]pyridine]-3'-carboxylate (**3j'**):

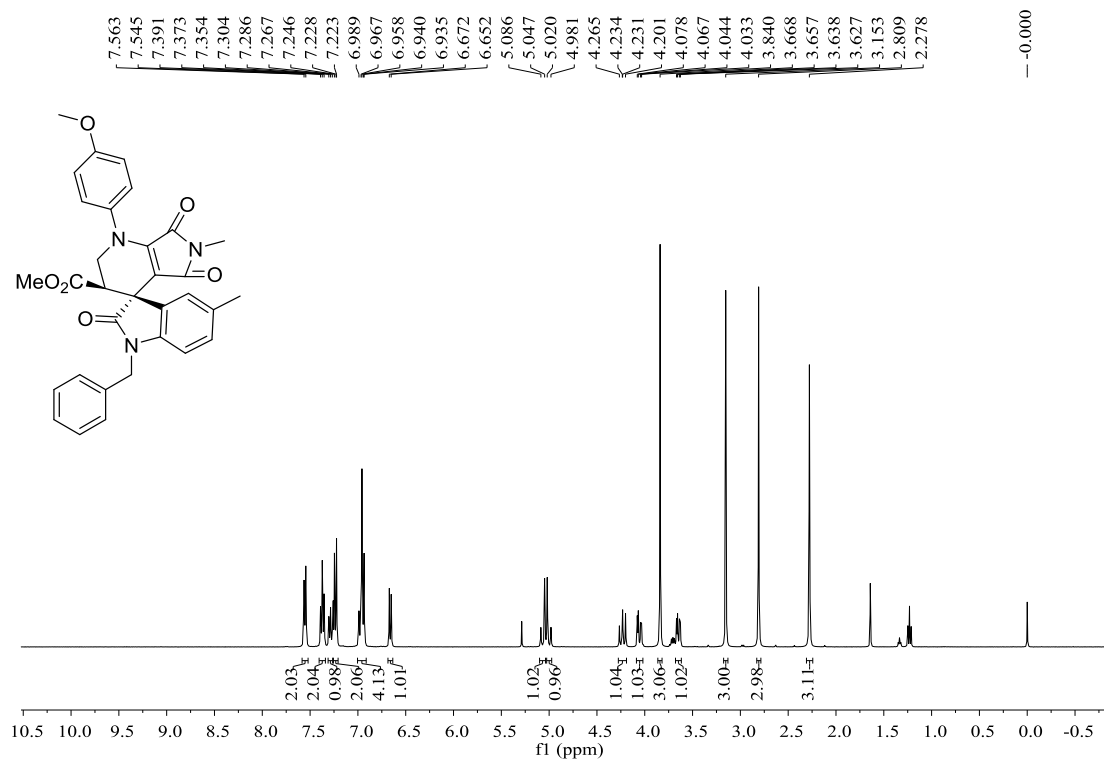



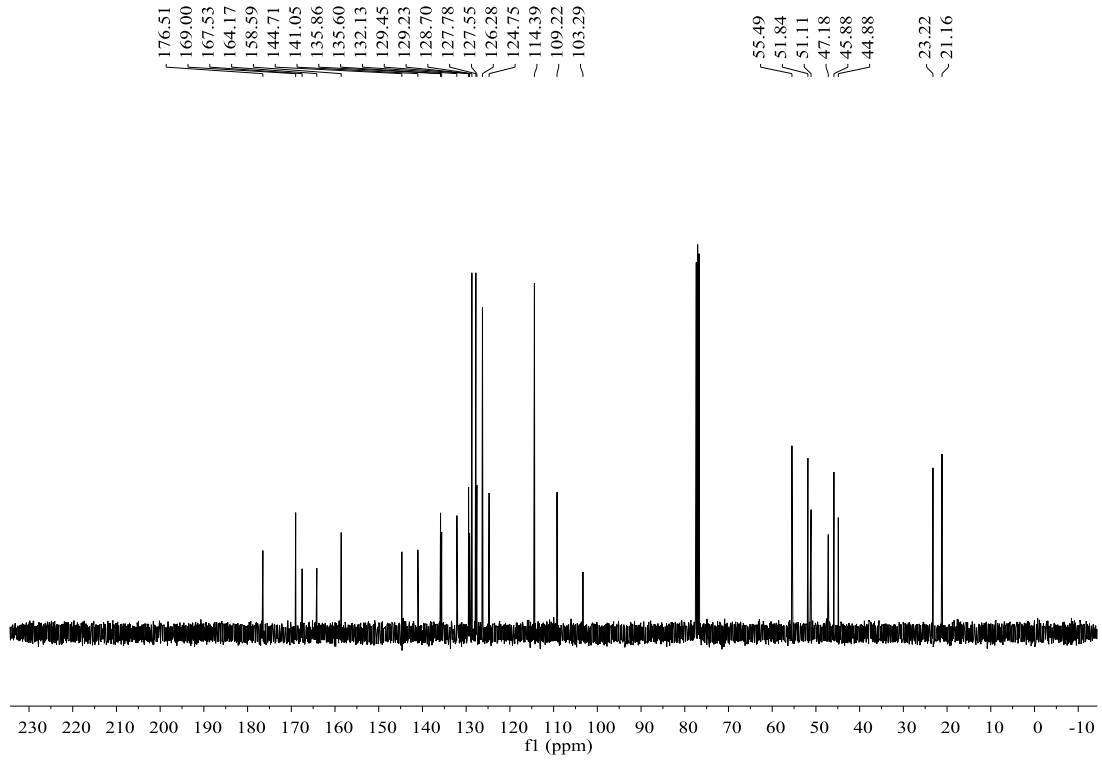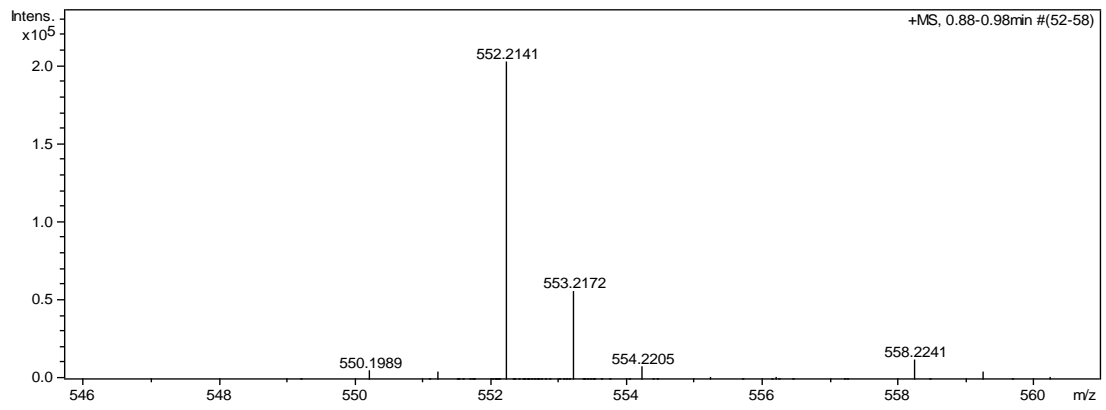

## Methyl

*rel*-(3*R*,3'*R*)-1-benzyl-5-chloro-6'-methyl-2,5,7'-trioxo-1'-phenyl-1',2',3',5',6',7'-hexahydrospiro[indoline-3,4'-pyrrolo[3,4-*b*]pyridine]-3'-carboxylate (3k):

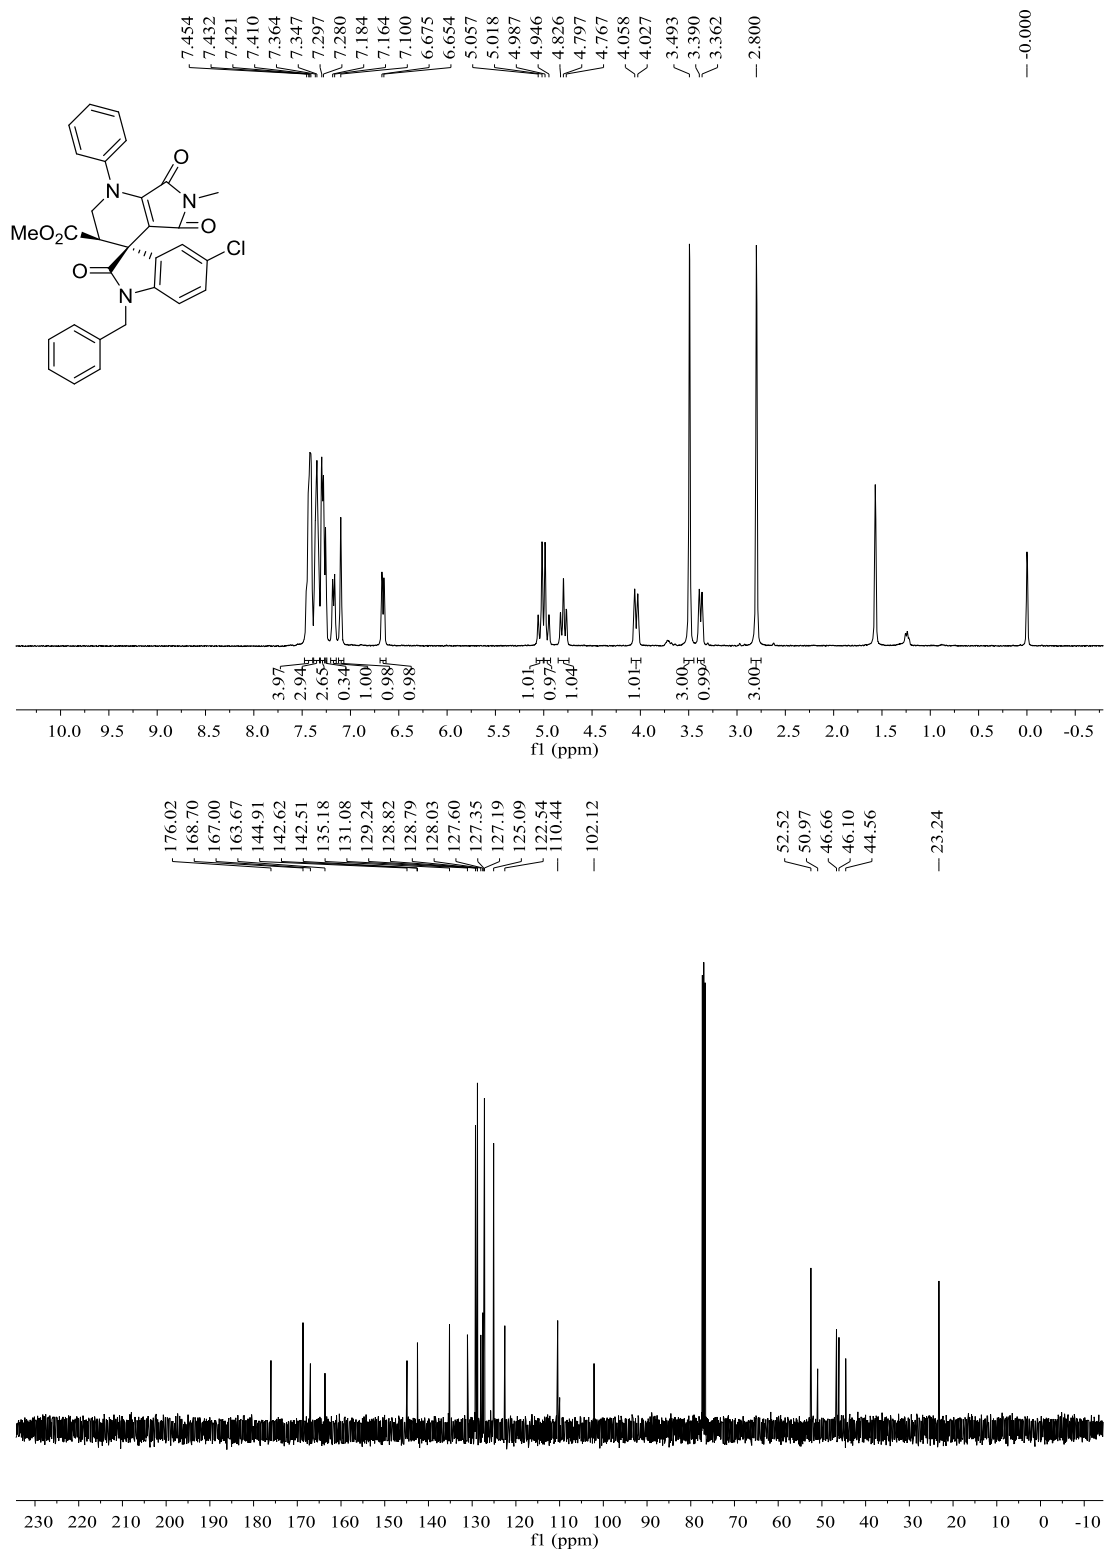

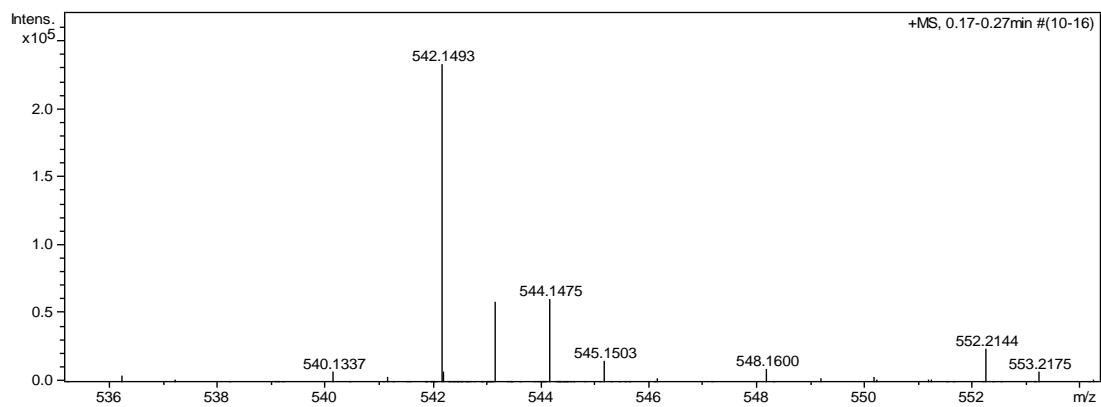

## Methyl

***rel*-(3*S*,3'*R*)-1-benzyl-5-chloro-6'-methyl-2,5',7'-trioxo-1'-phenyl-1',2',3',5',6',7'-hexahydrospiro[indoline-3,4'-pyrrolo[3,4-*b*]pyridine]-3'-carboxylate (3k')**:

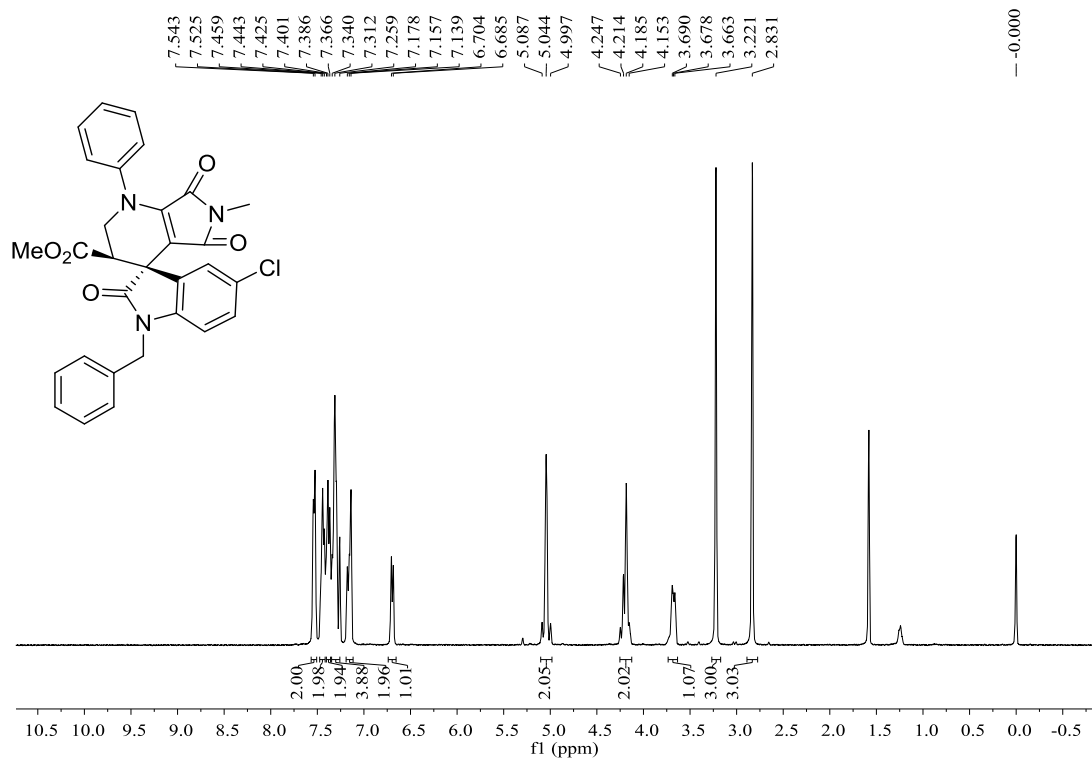

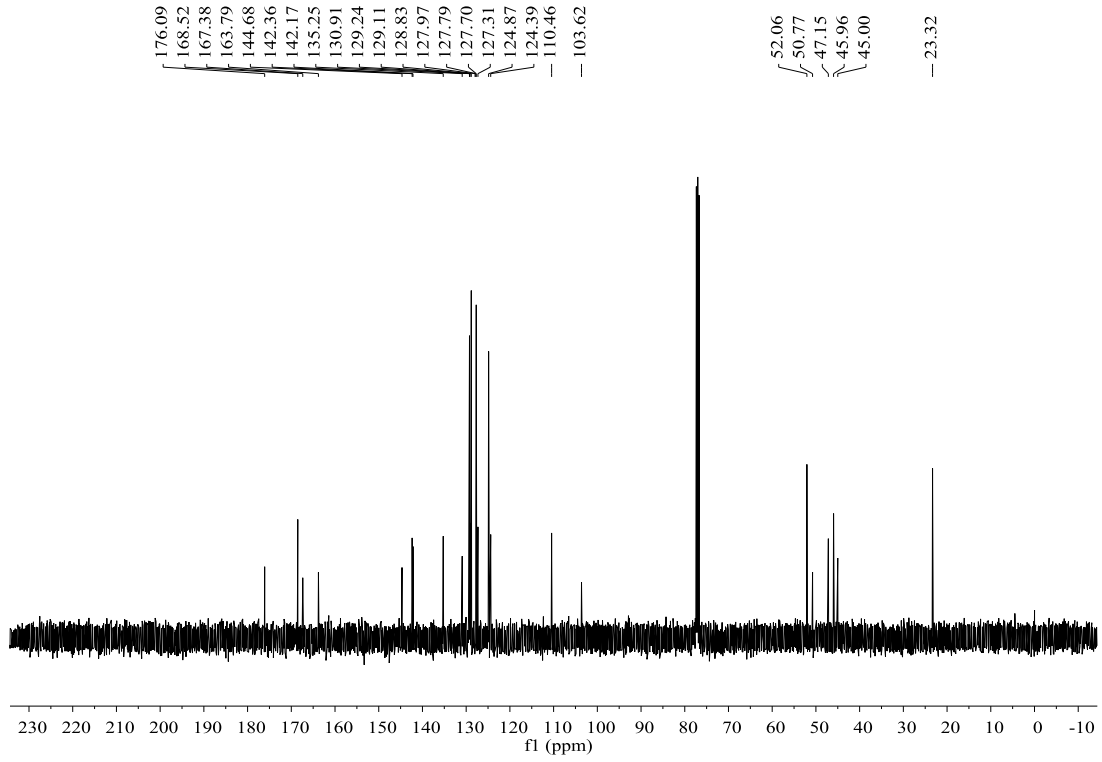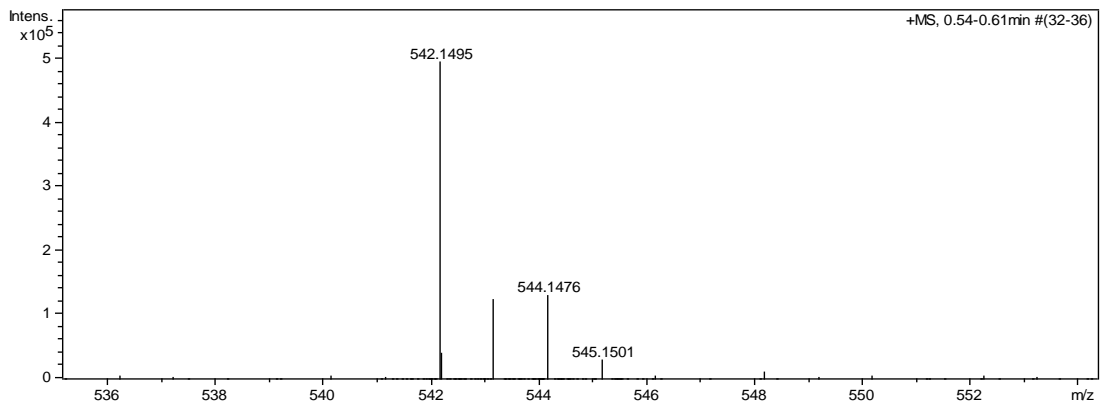

## Methyl

*rel*-(3*R*,3'*R*)-1-benzyl-5-chloro-6'-methyl-2,5,7'-trioxo-1'-(*p*-tolyl)-1',2',3',5',6',7'-hexahydros  
piro[indoline-3,4'-pyrrolo[3,4-*b*]pyridine]-3'-carboxylate (3I):

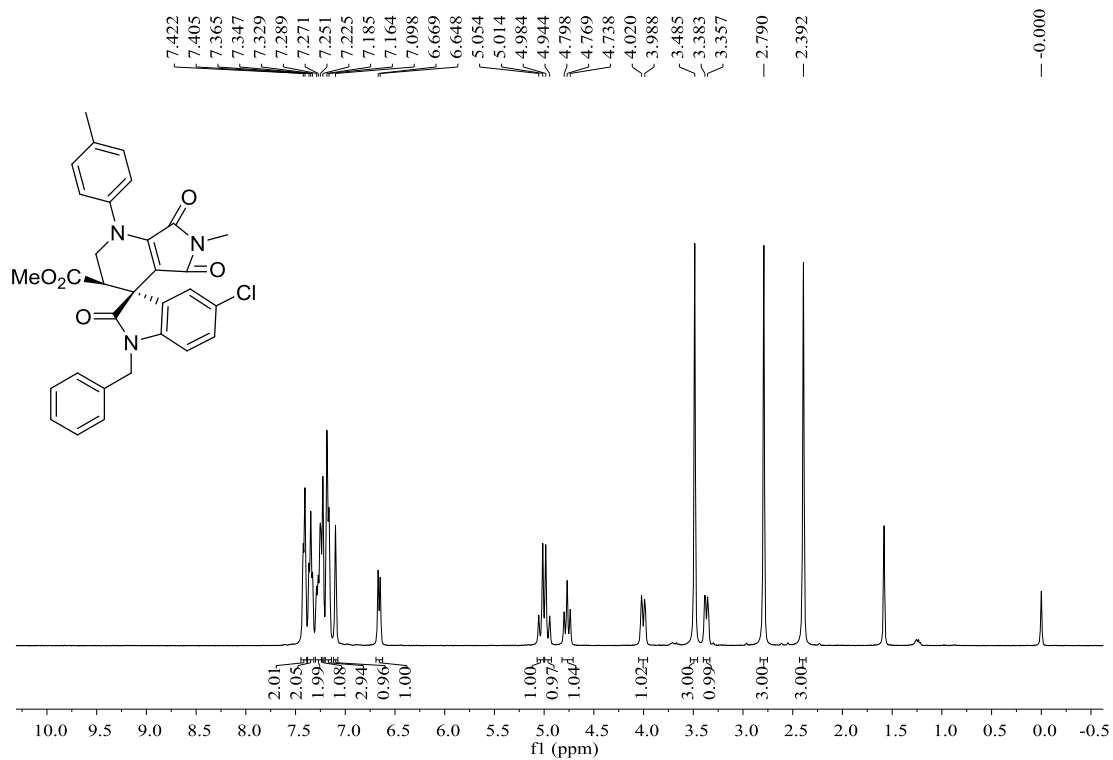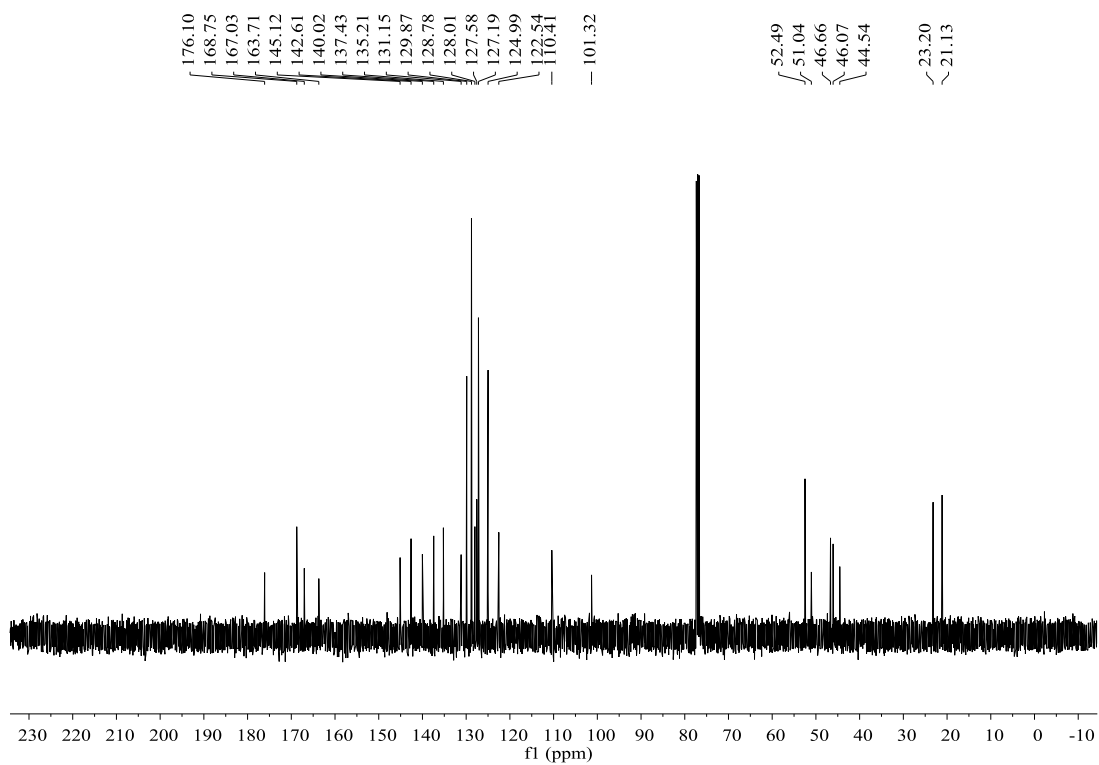

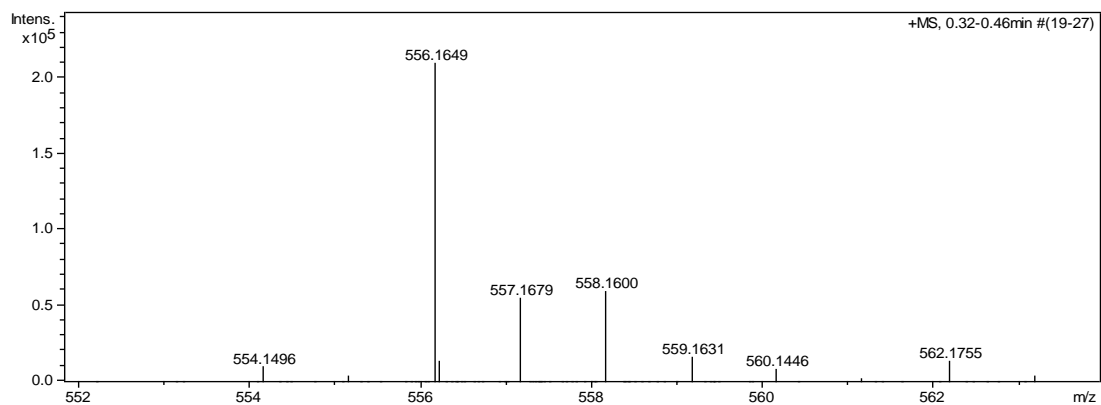

## Methyl

***rel*-(3*S*,3'*R*)-1-benzyl-5-chloro-6'-methyl-2,5',7'-trioxo-1'-(*p*-tolyl)-1',2',3',5',6',7'-hexahydros piro[indoline-3,4'-pyrrolo[3,4-*b*]pyridine]-3'-carboxylate (3I):**

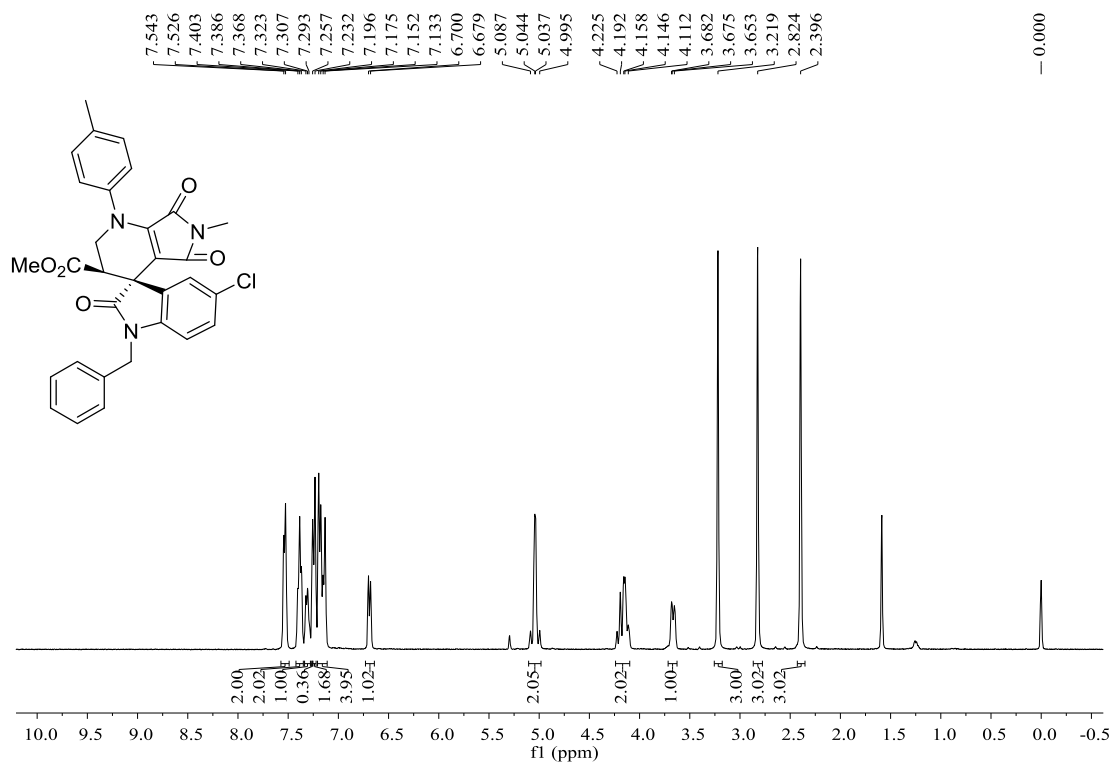

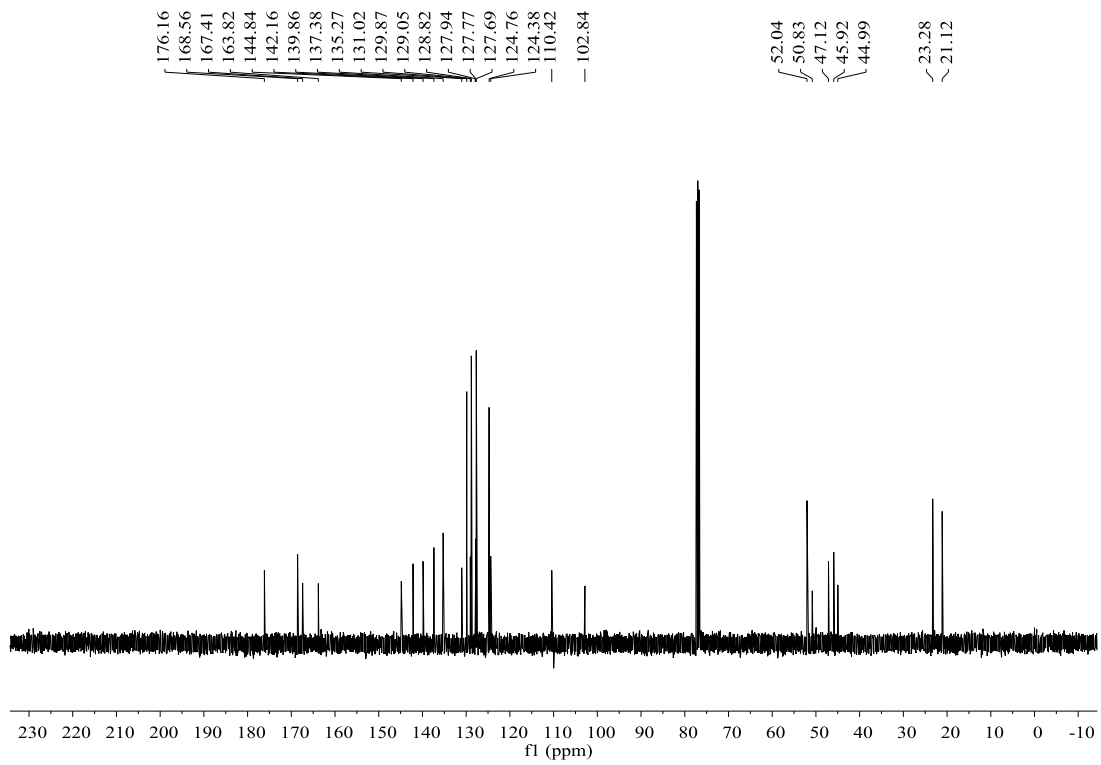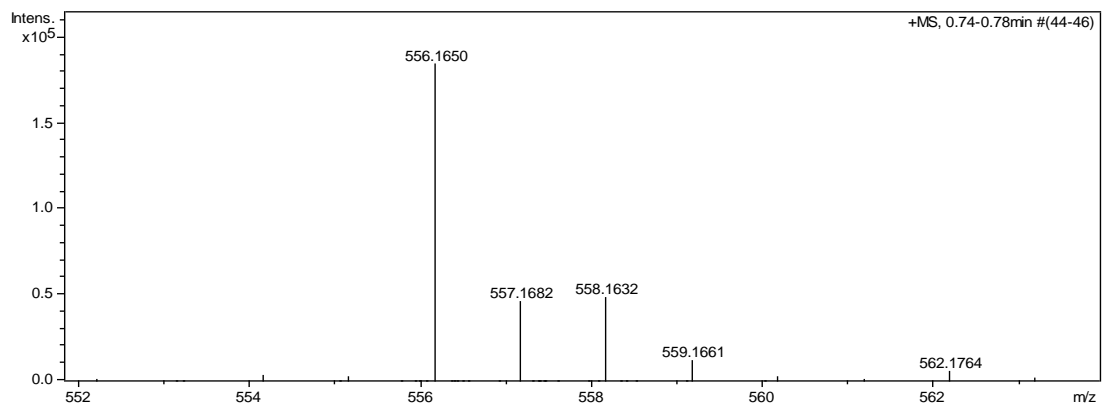

**Methyl**

***rel*-(3*R*,3'*R*)-1-benzyl-5-chloro-1'-(4-methoxyphenyl)-6'-methyl-2,5,7'-trioxo-1,2',3',5,6,7'-hexahydrospiro[indoline-3,4'-pyrrolo[3,4-*b*]pyridine]-3'-carboxylate (3m):**

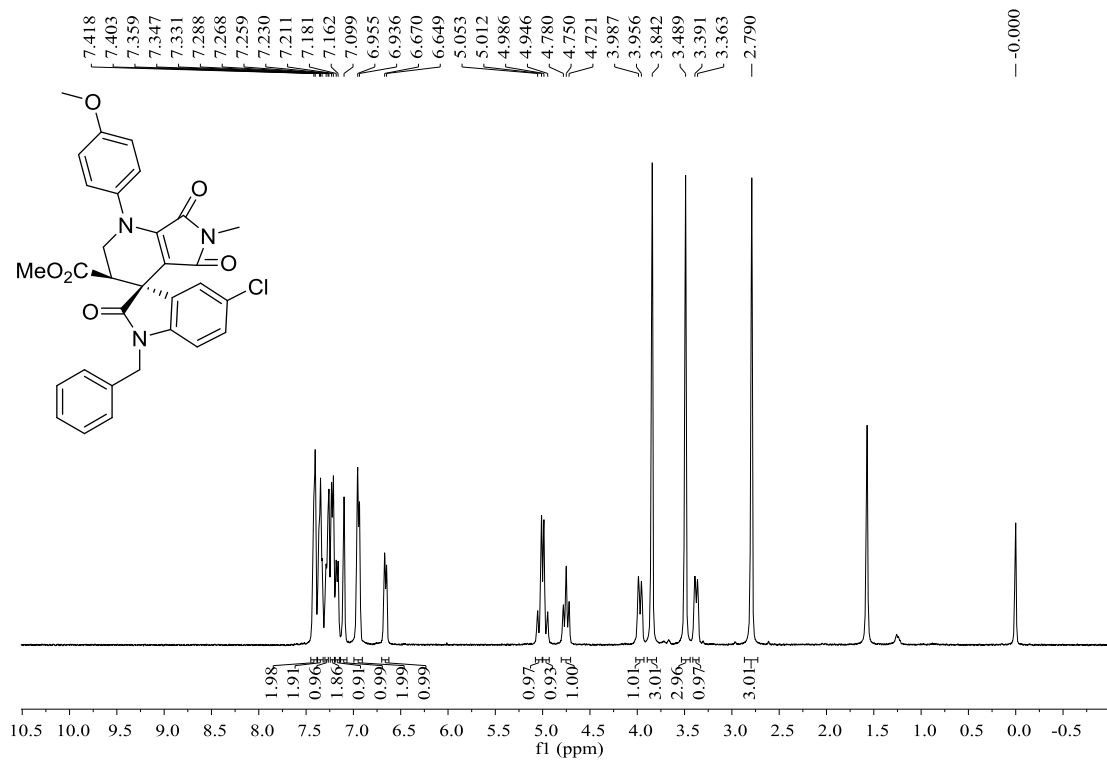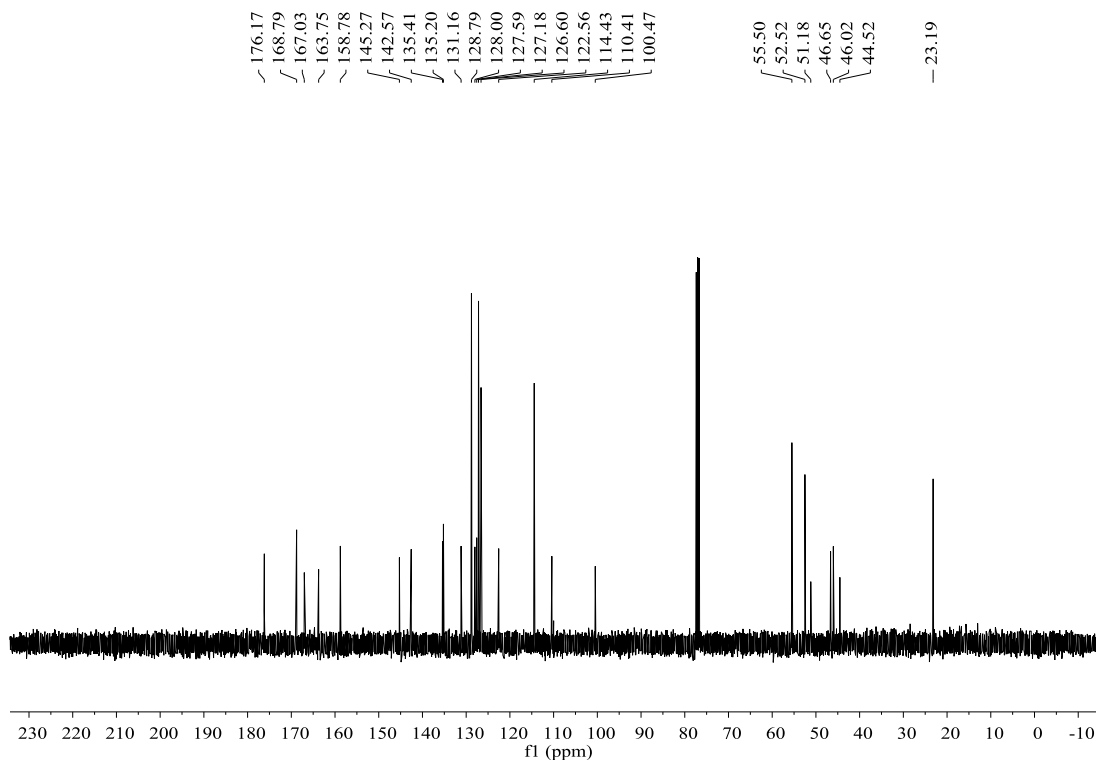



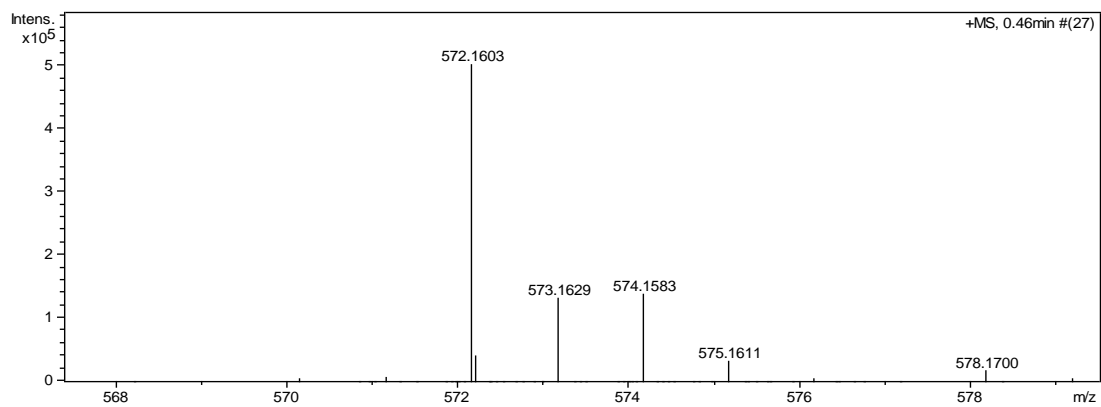

## Methyl

***rel*-(3*S*,3'*R*)-1-benzyl-5-chloro-1'-(4-methoxyphenyl)-6'-methyl-2,5',7'-trioxo-1',2',3',5',6',7'-hexahydrospiro[indoline-3,4'-pyrrolo[3,4-*b*]pyridine]-3'-carboxylate (3*m*):**

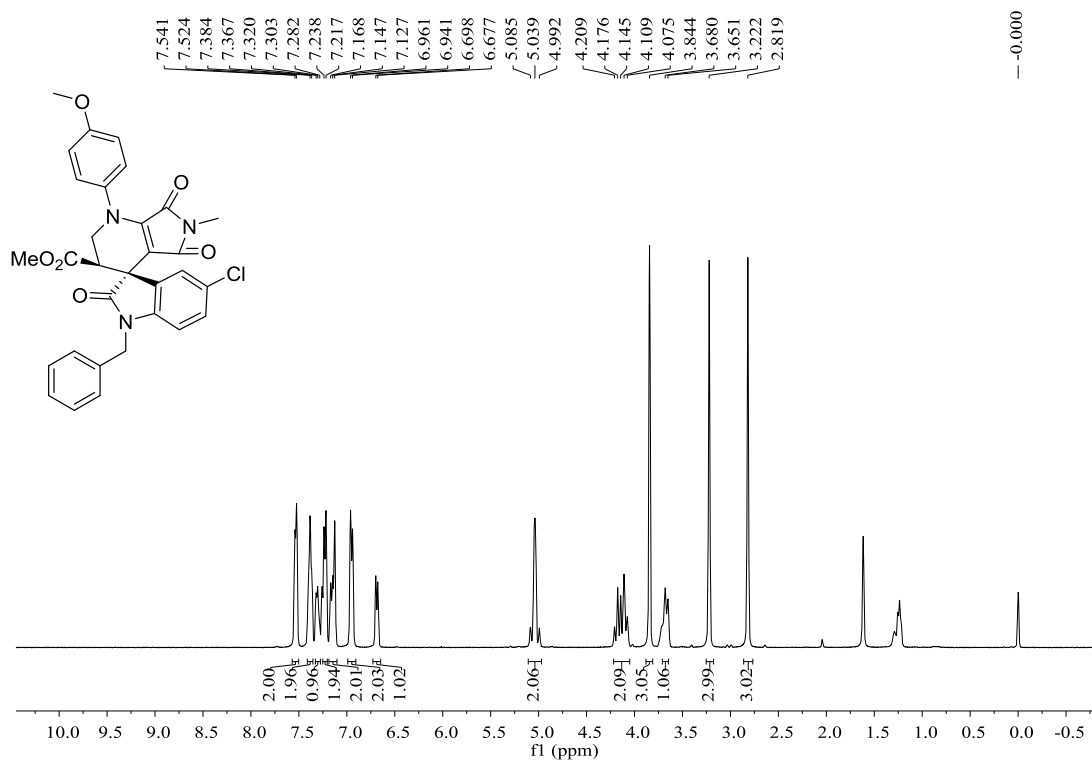

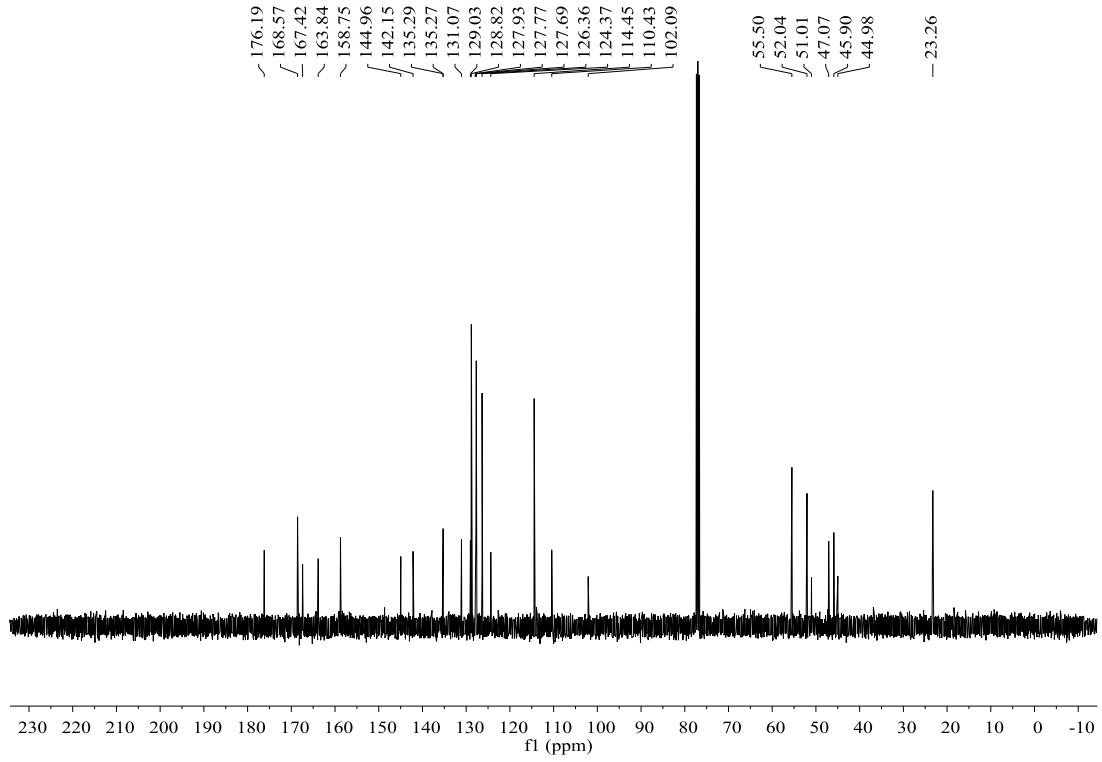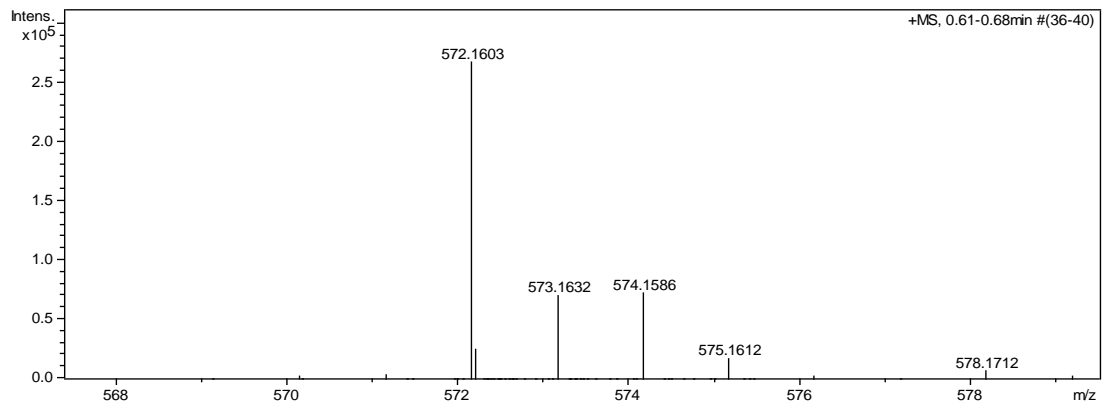

***rel*-(3*R*,3'*R*)-1-benzyl-5,6'-dimethyl-2,5',7'-trioxo-1'-phenyl-1',2',3',5',6',7'-hexahydrospiro  
[indoline-3,4'-pyrrolo[3,4-*b*]pyridine]-3'-carbonitrile (4a):**

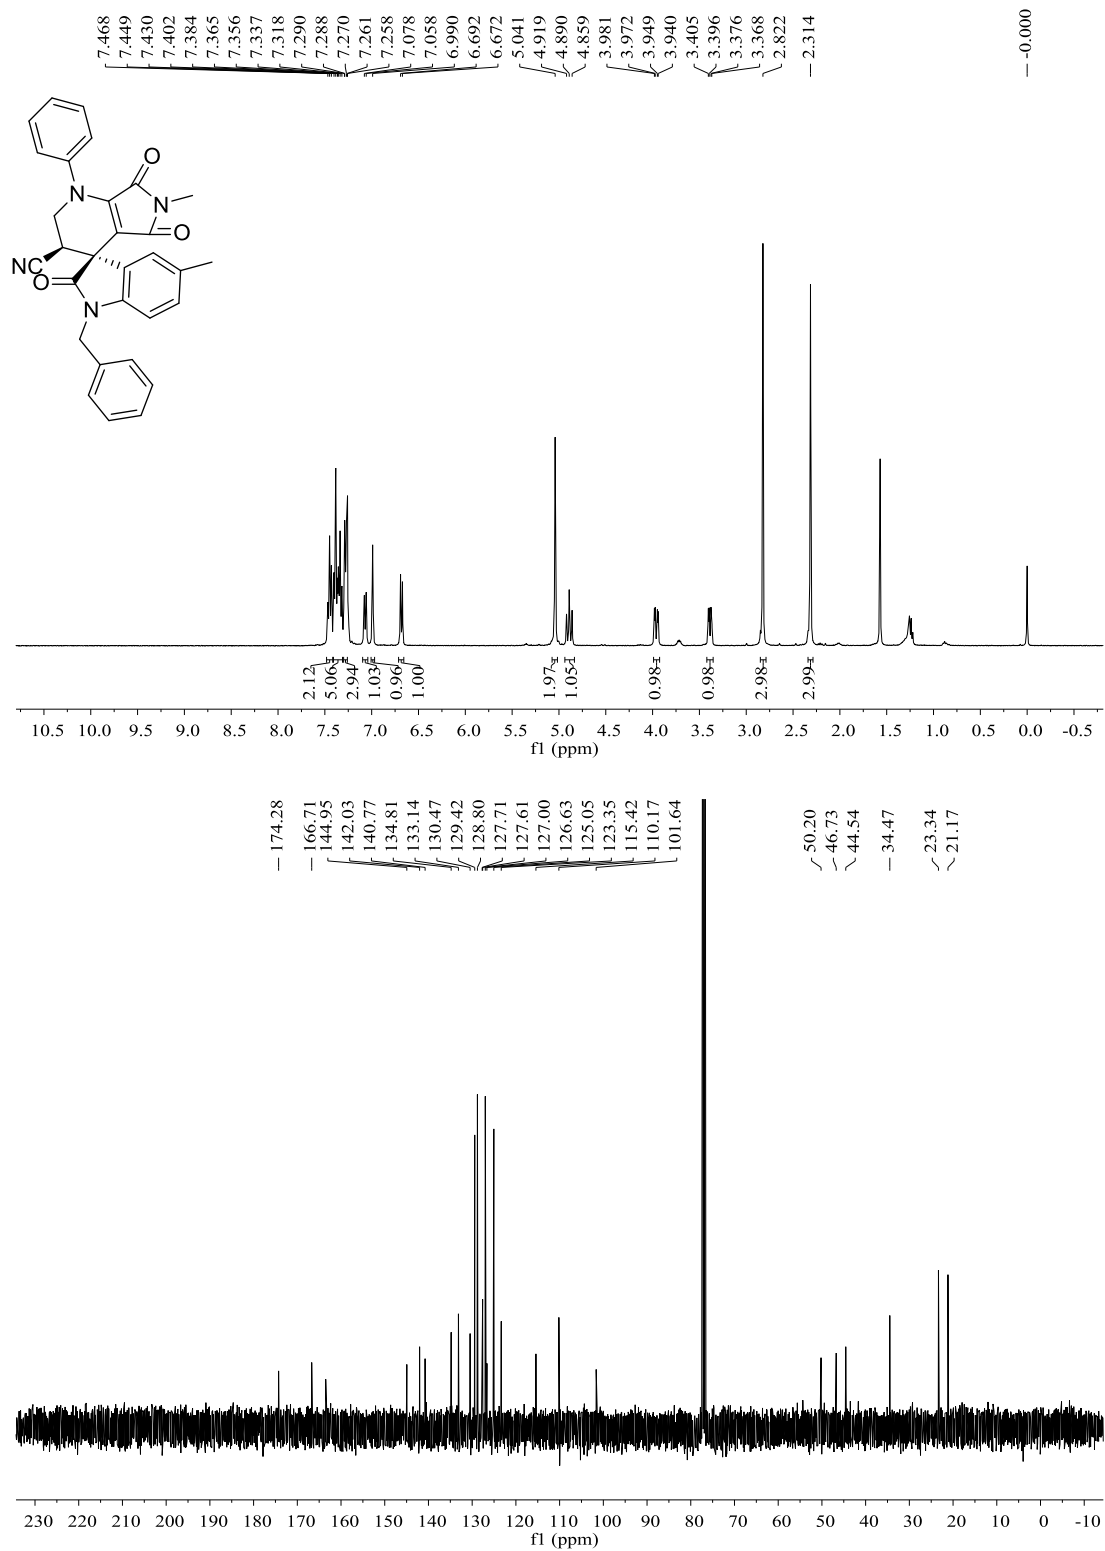

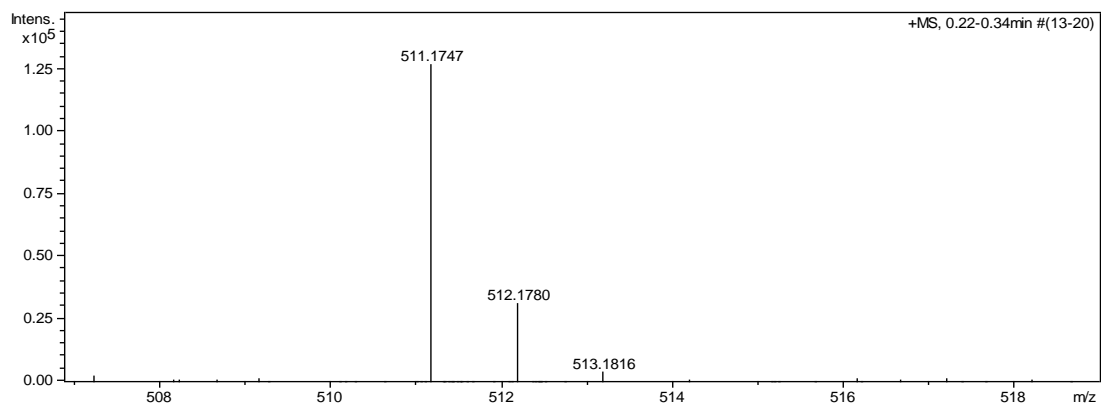

***rel*-(3*S*,3'*R*)-1-benzyl-5,6'-dimethyl-2,5',7'-trioxo-1'-phenyl-1',2',3',5',6',7'-hexahydrospiro [indoline-3,4'-pyrrolo[3,4-*b*]pyridine]-3'-carbonitrile (4a')**:

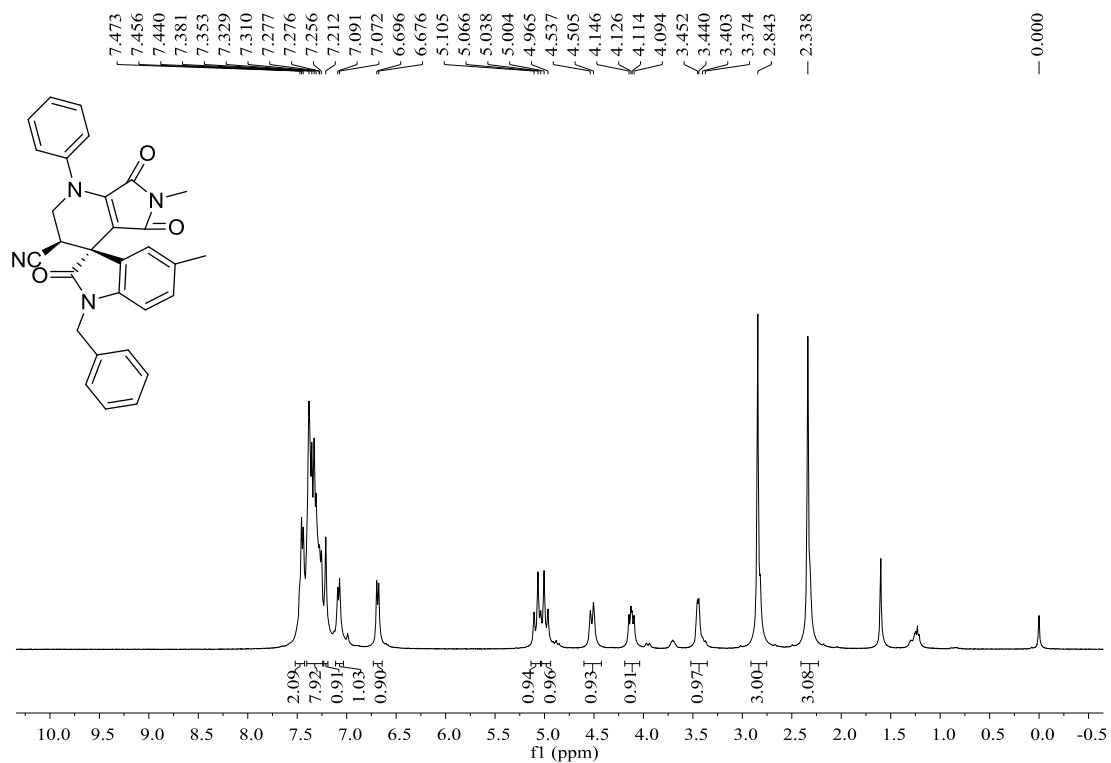

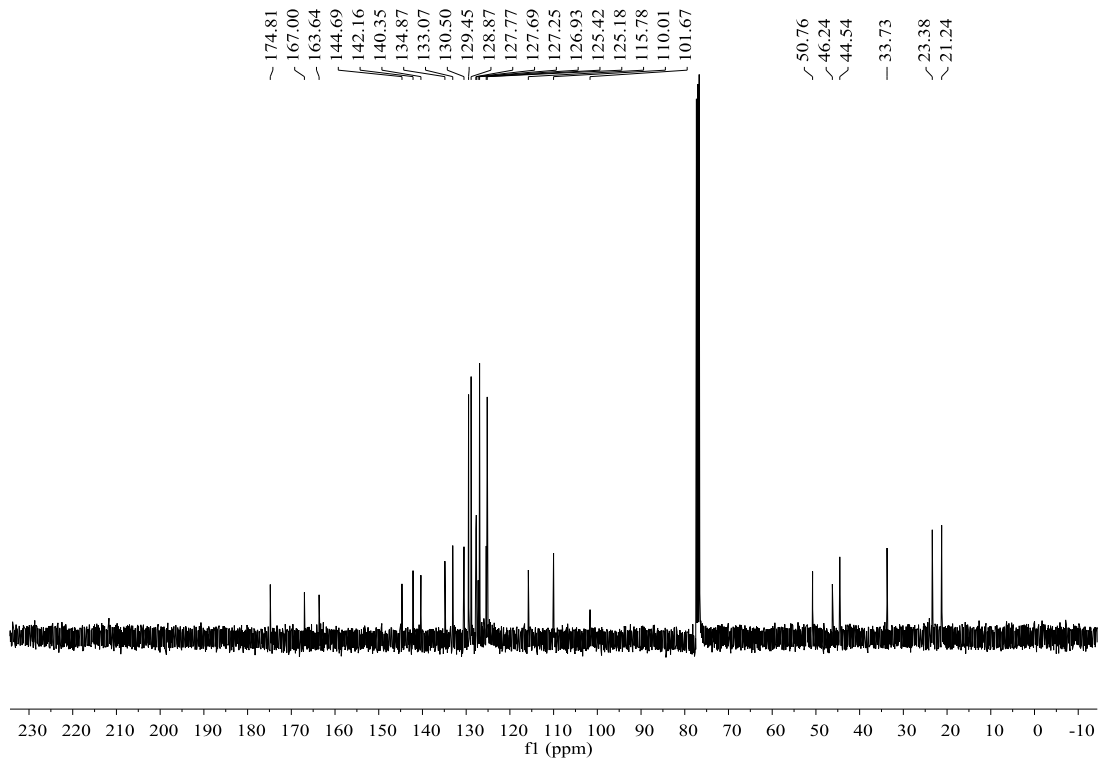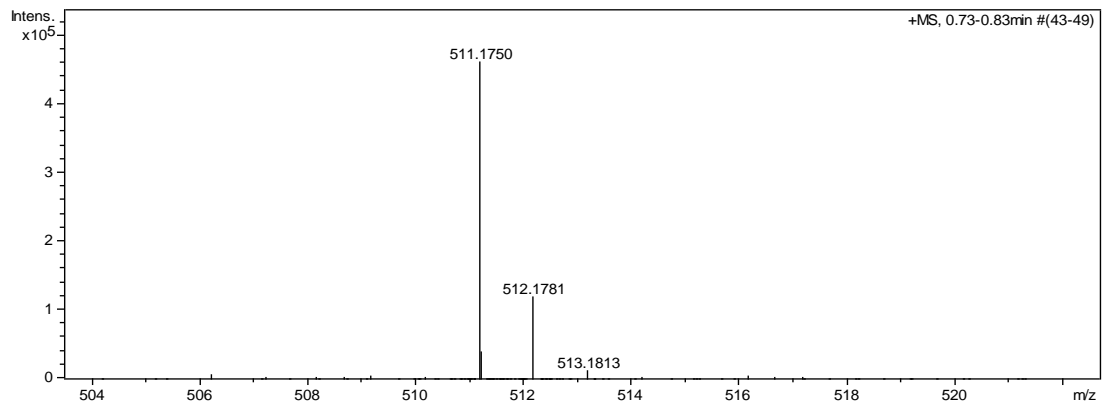

***rel*-(3*R*,3'*R*)-1-benzyl-5,6'-dimethyl-2,5',7'-trioxo-1'-(*p*-tolyl)-1',2',3',5',6',7'-hexahydrospiro [indoline-3,4'-pyrrolo[3,4-b]pyridine]-3'-carbonitrile (4b):**

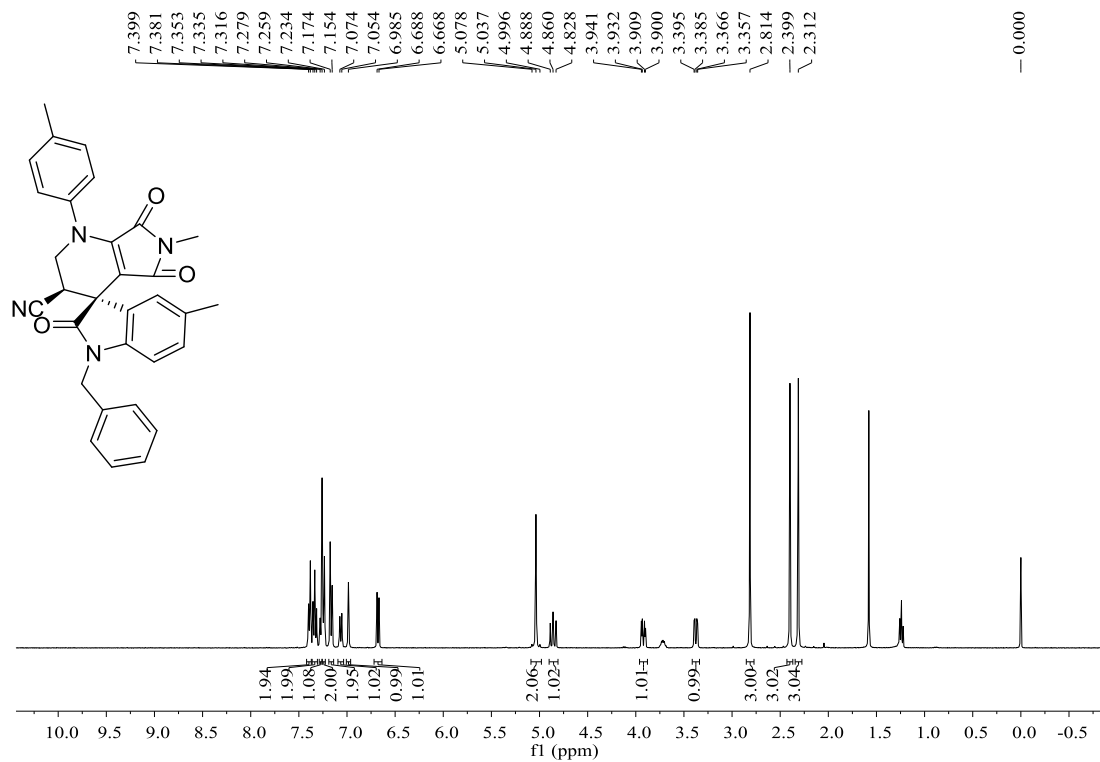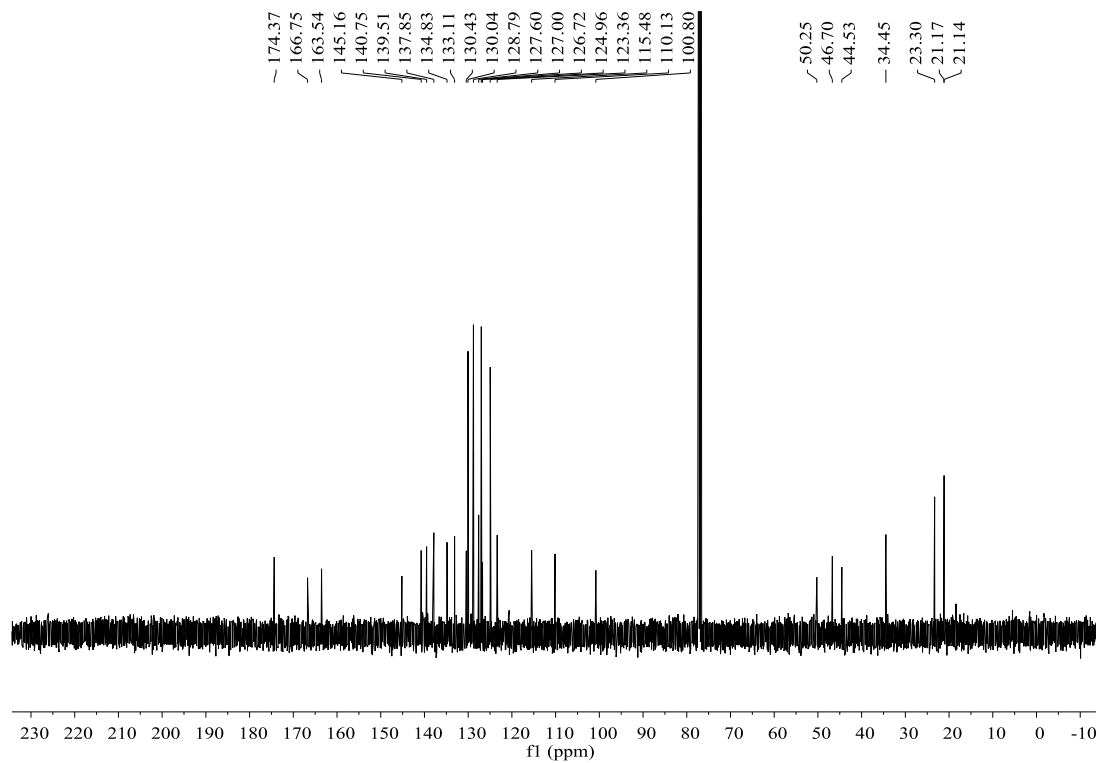

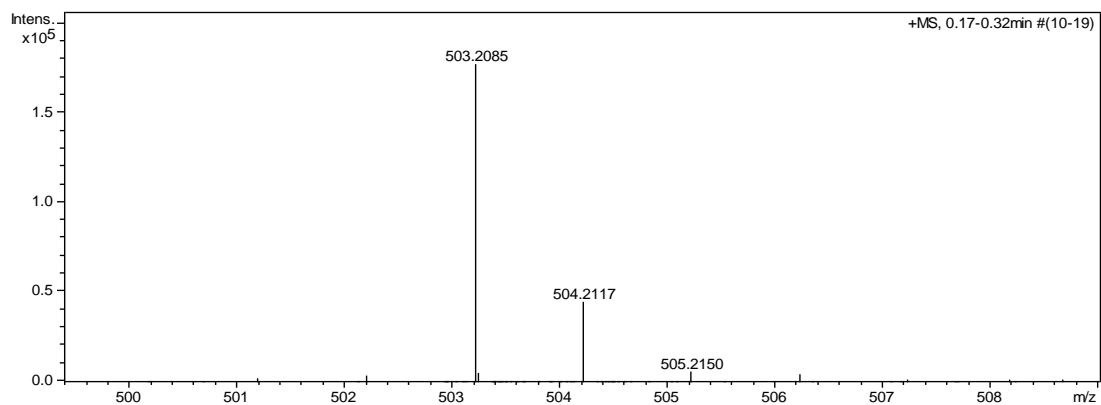

***rel*-(3*S*,3'*R*)-1-benzyl-5,6'-dimethyl-2,5',7'-trioxo-1'-(*p*-tolyl)-1',2',3',5',6',7'-hexahydrospiro [indoline-3,4'-pyrrolo[3,4-*b*]pyridine]-3'-carbonitrile (4b'):**

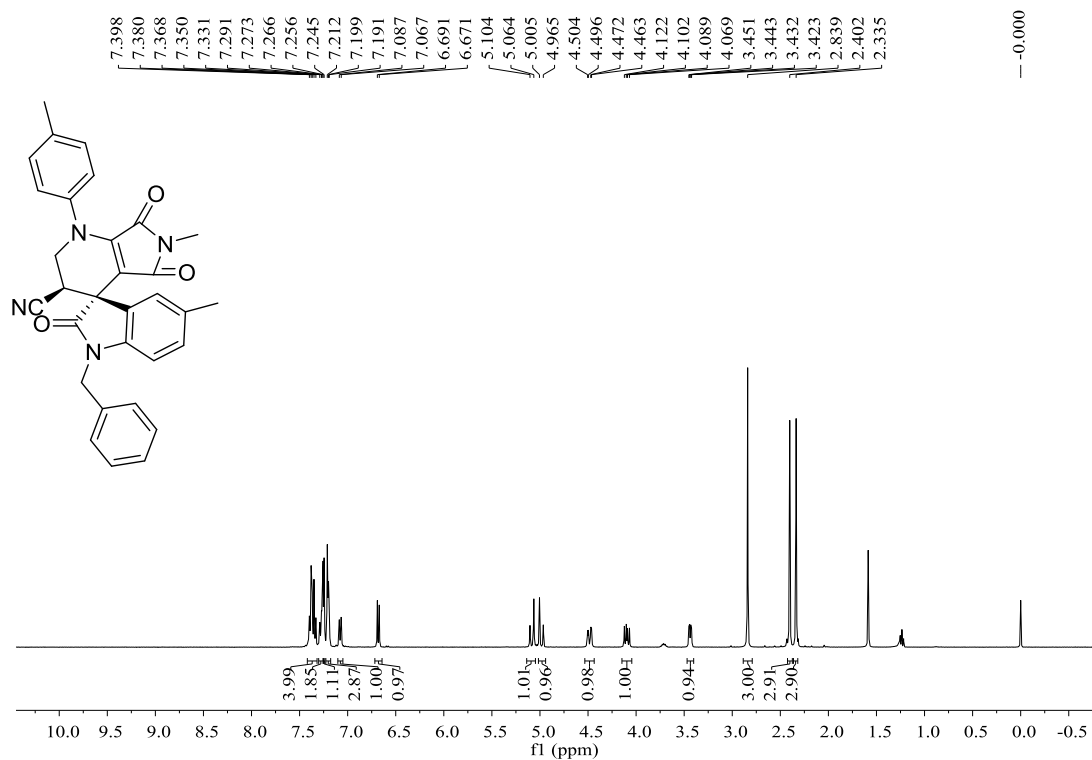

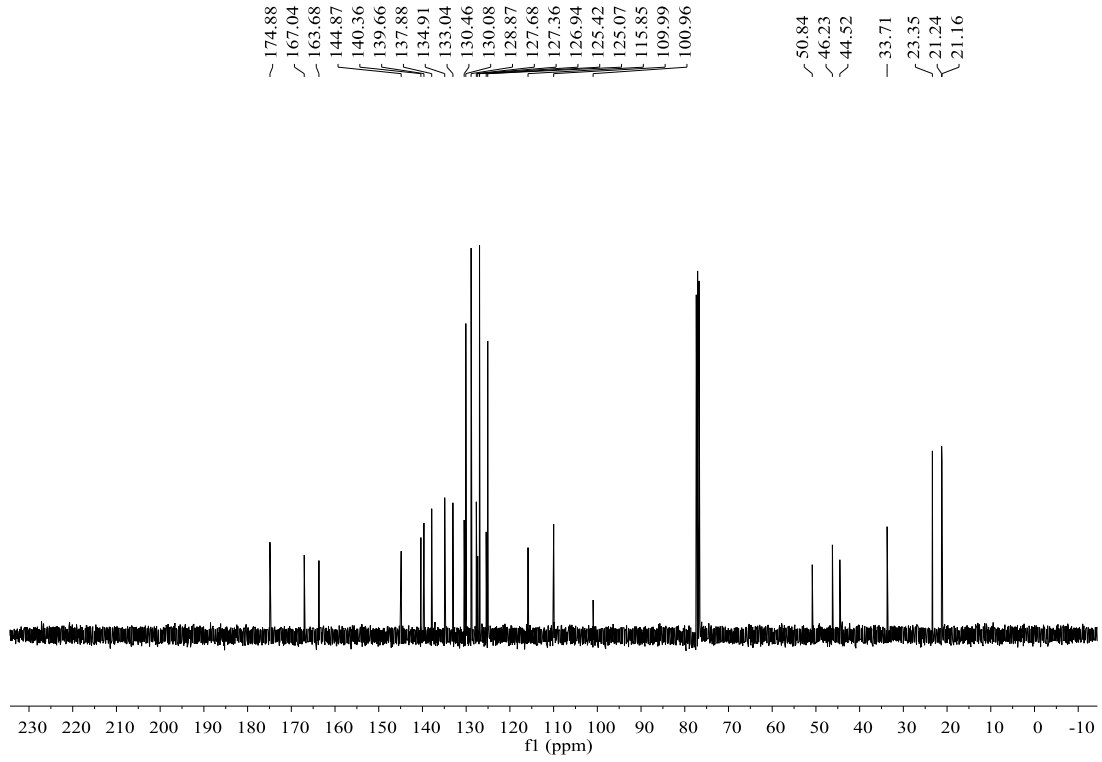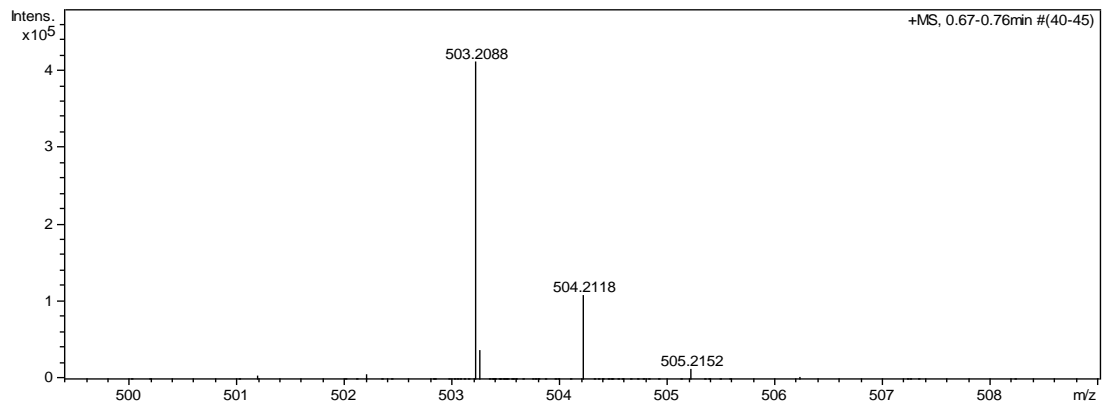



***rel*-(3*S*,3'*R*)-1-benzyl-5-chloro-6'-methyl-2,5',7'-trioxo-1'-phenyl-1',2',3',5',6',7'-hexahydro-s piro[indoline-3,4'-pyrrolo[3,4-*b*]pyridine]-3'-carbonitrile (4c')**

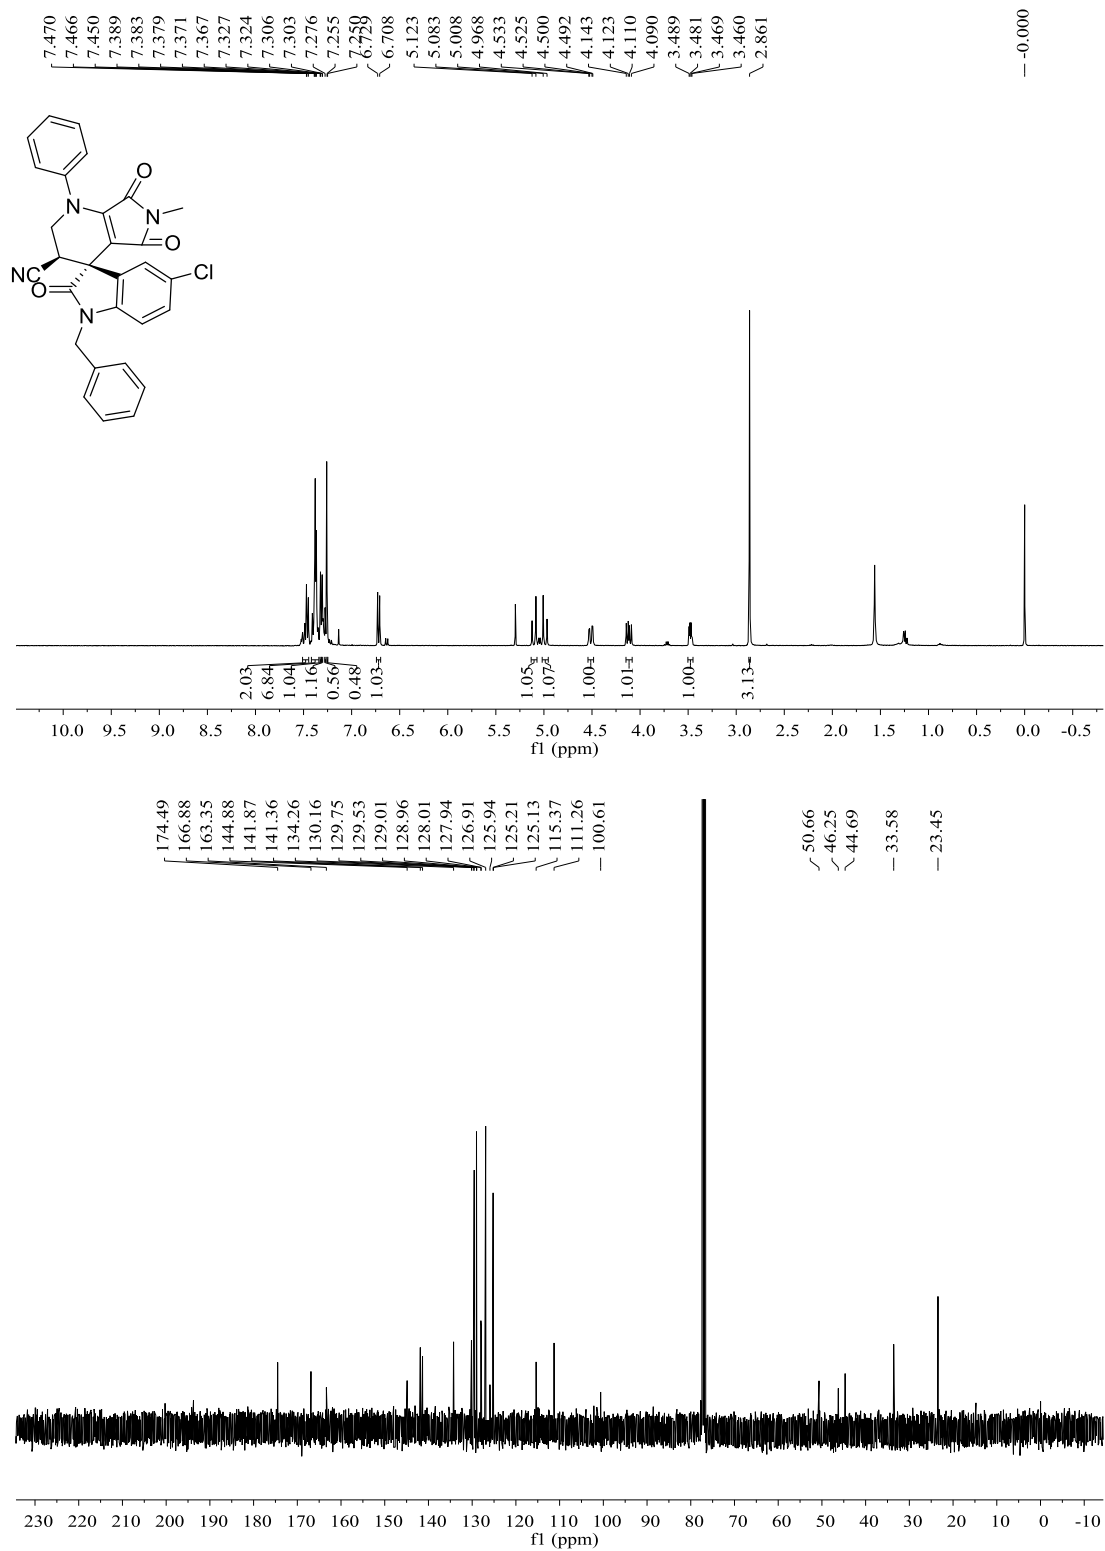

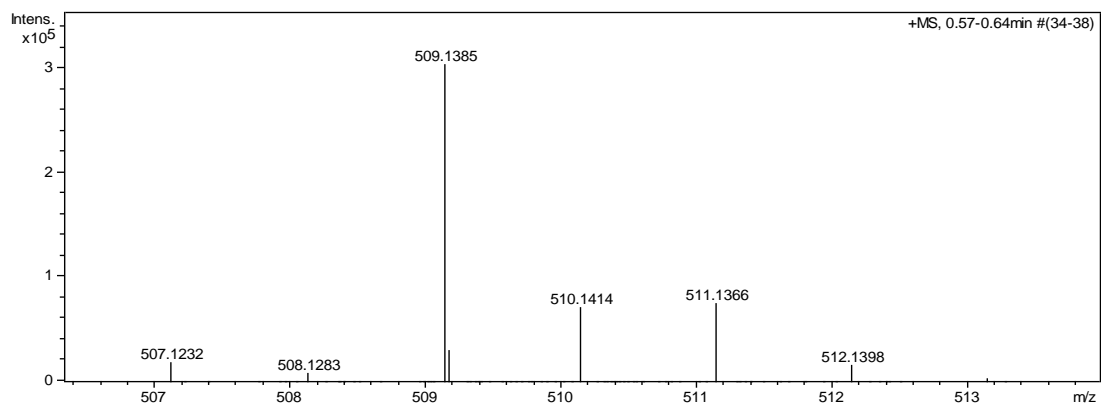

***rel*-(3*S*,3'*R*)-1-benzyl-5-chloro-6'-methyl-2,5',7'-trioxo-1'-(*p*-tolyl)-1',2',3',5',6',7'-hexahydro-s piro[indoline-3,4'-pyrrolo[3,4-*b*]pyridine]-3'-carbonitrile (4d')**:

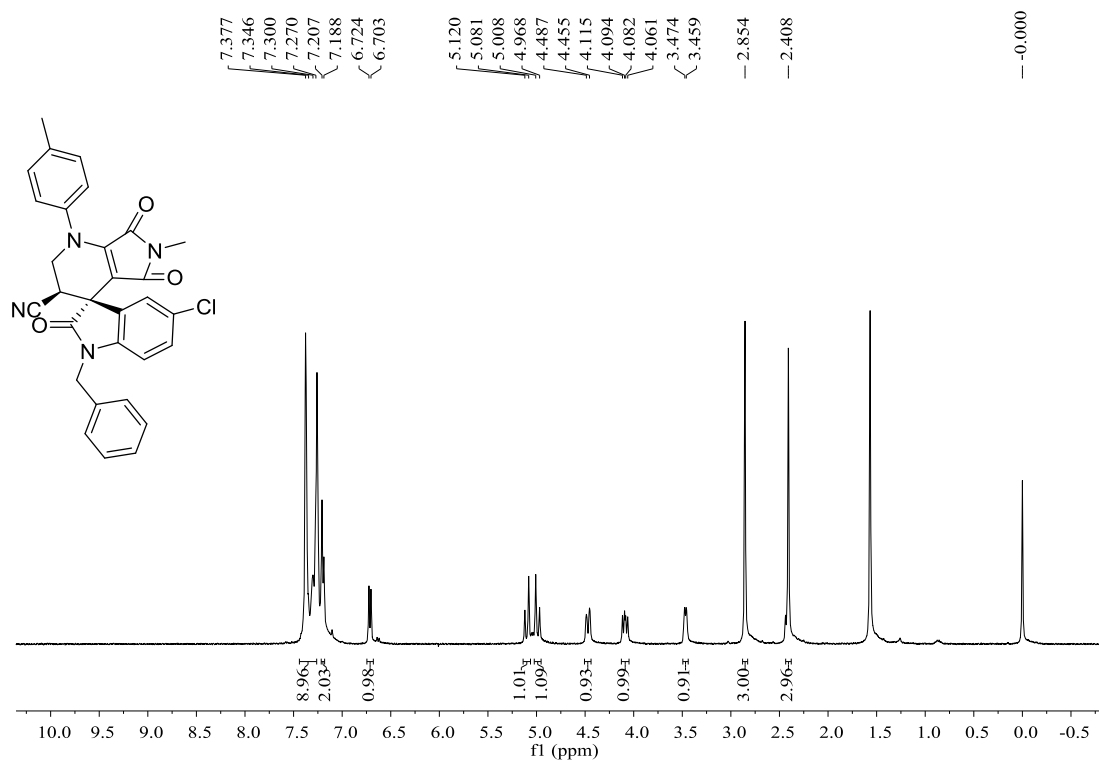

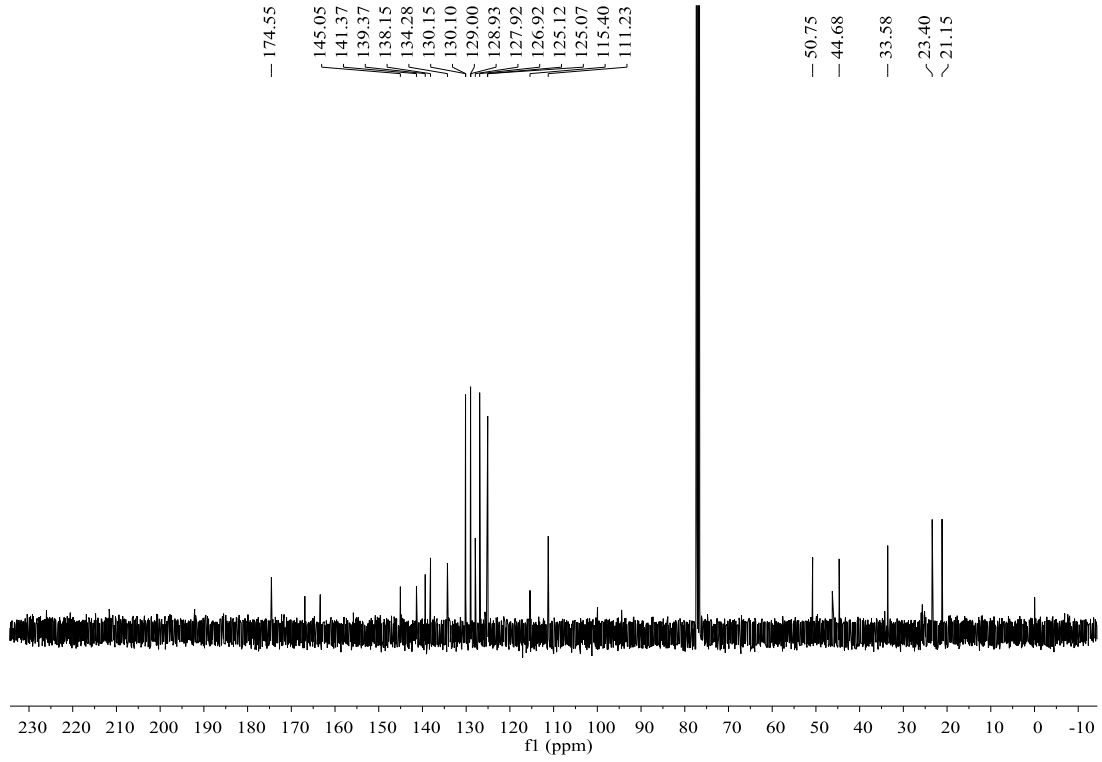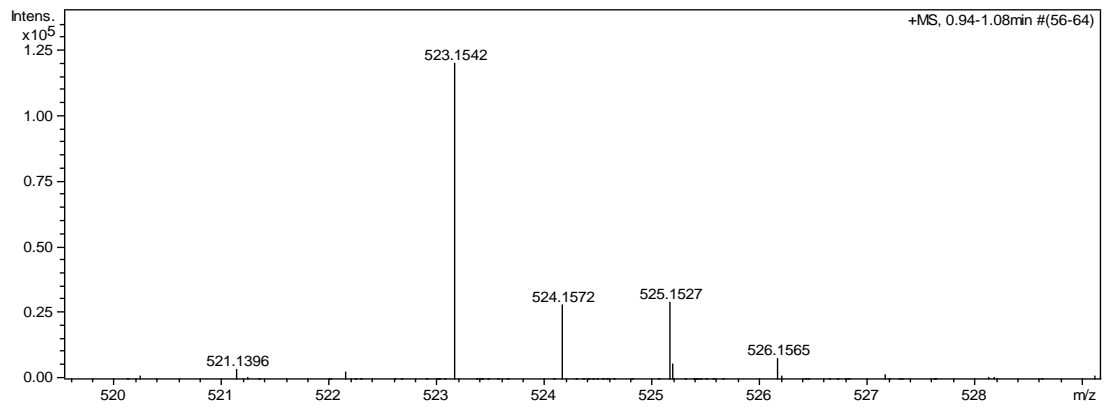

***rel*-(3*S*,3'*R*)-1-benzyl-5-chloro-1'-(4-methoxyphenyl)-6'-methyl-2,5',7'-trioxo-1',2',3',5',6',7'-hexahydrospiro[indoline-3,4'-pyrrolo[3,4-*b*]pyridine]-3'-carbonitrile (4e')**

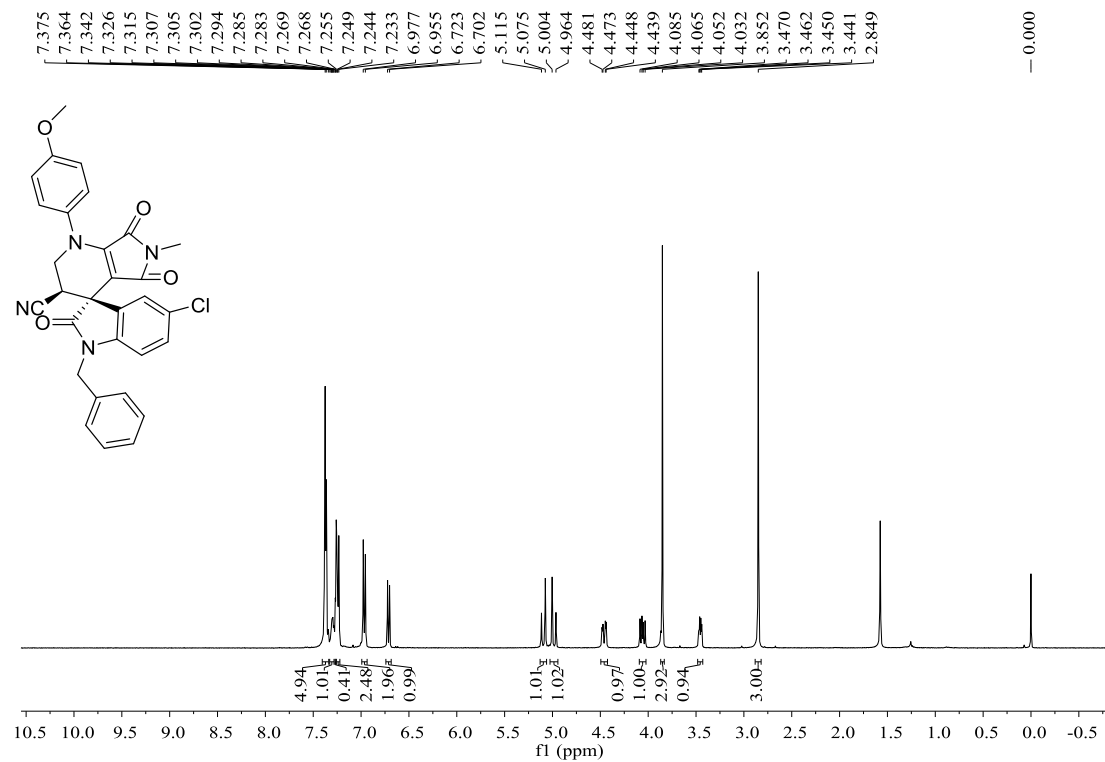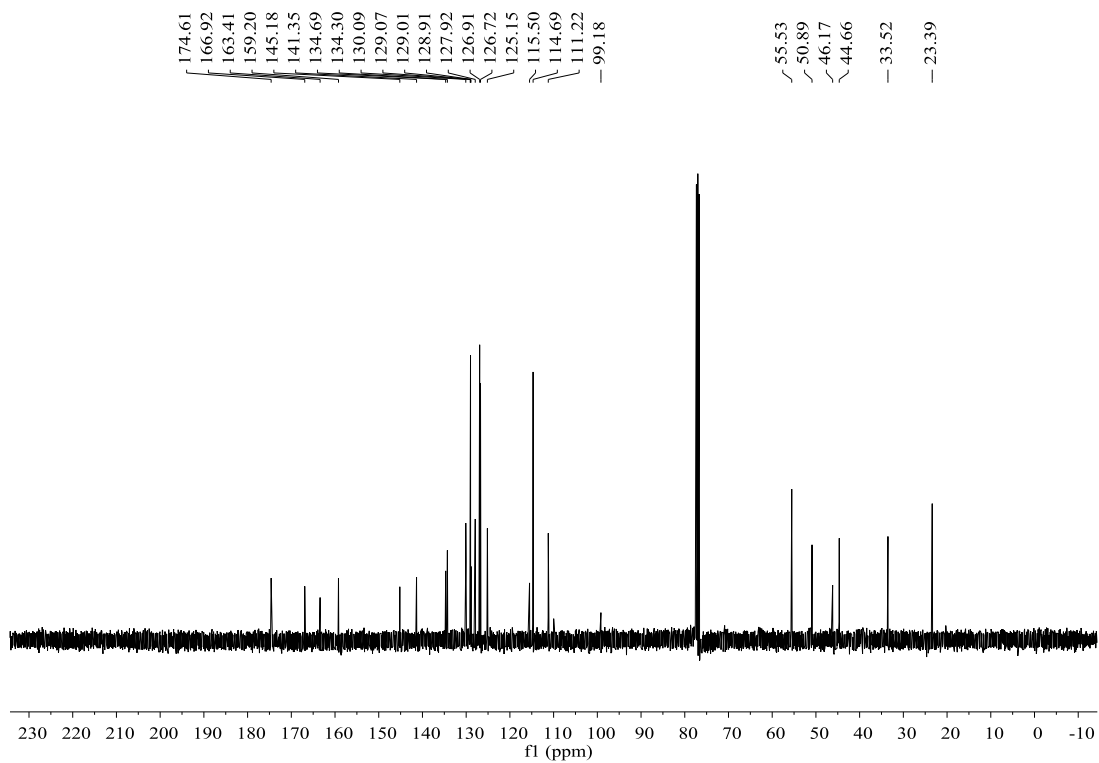

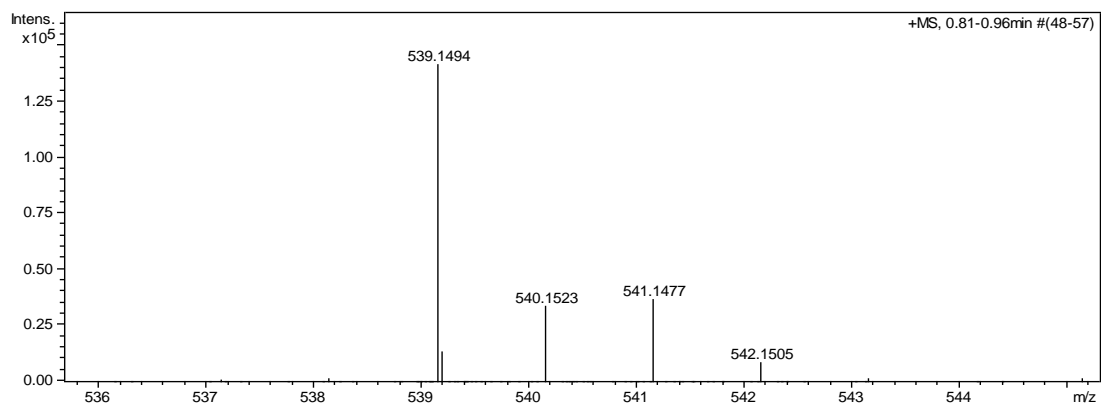

***rel*-(3*R*,3'*R*)-1-butyl-5,6'-dimethyl-2,5',7'-trioxo-1'-phenyl-1',2',3',5',6',7'-hexahydrospiro [indoline-3,4'-pyrrolo[3,4-*b*]pyridine]-3'-carbonitrile (4f):**

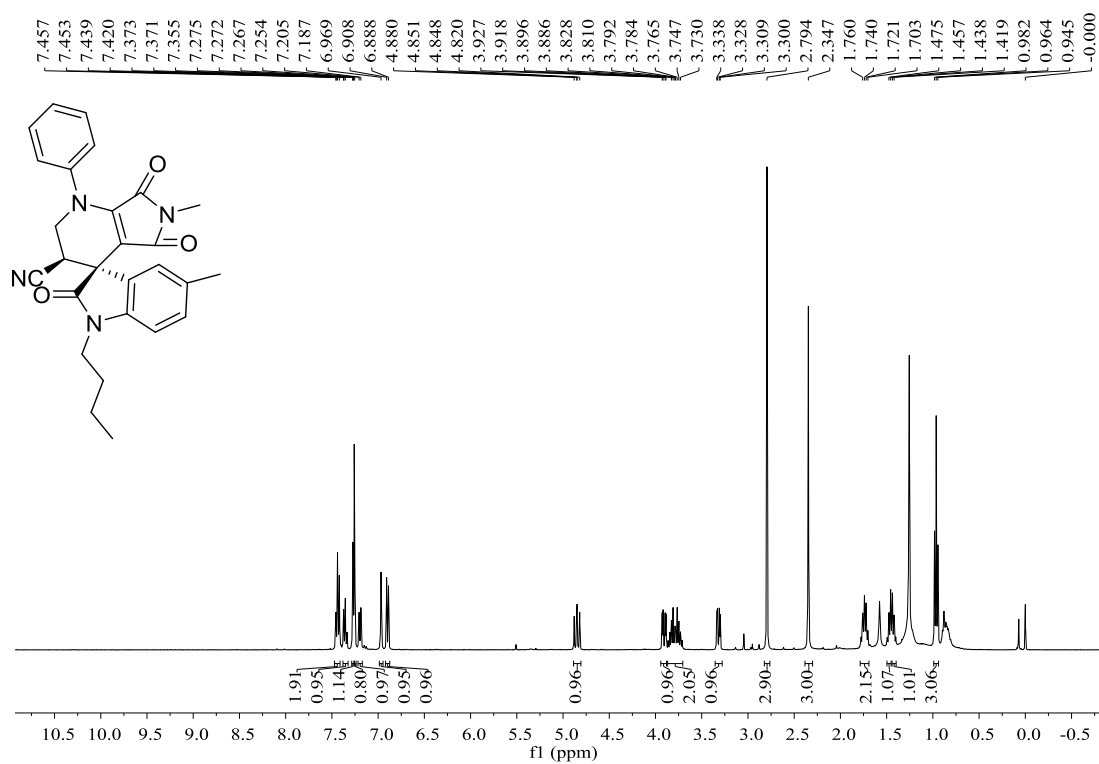

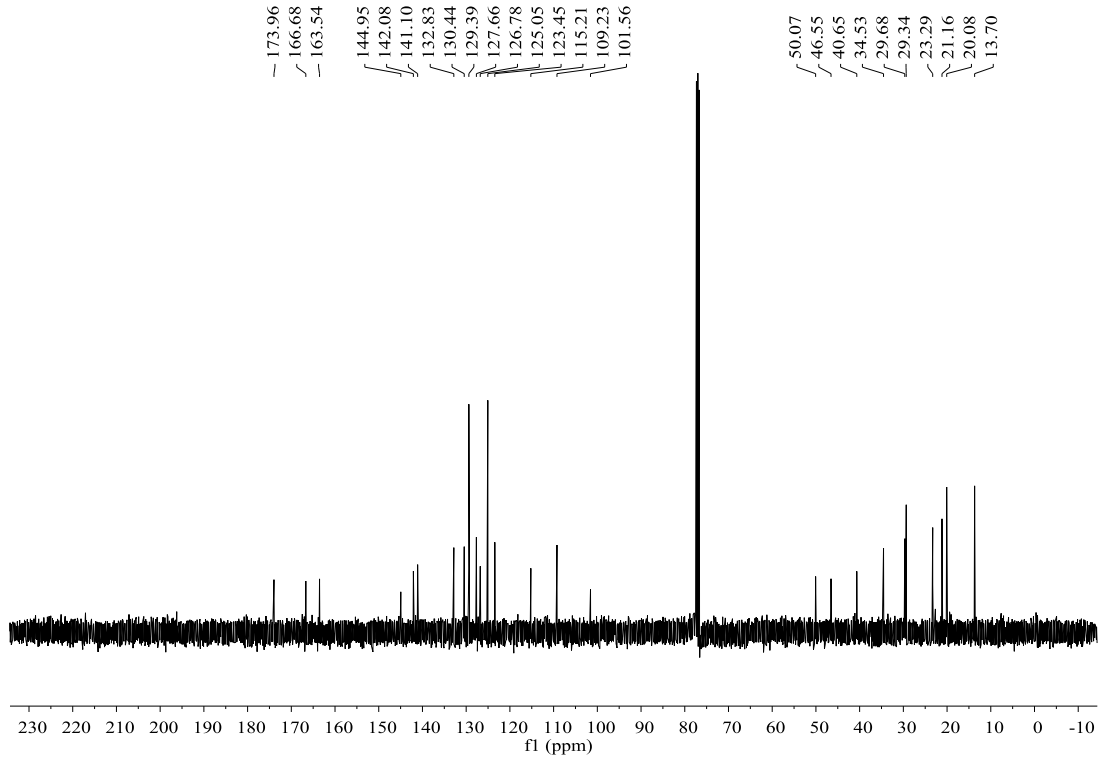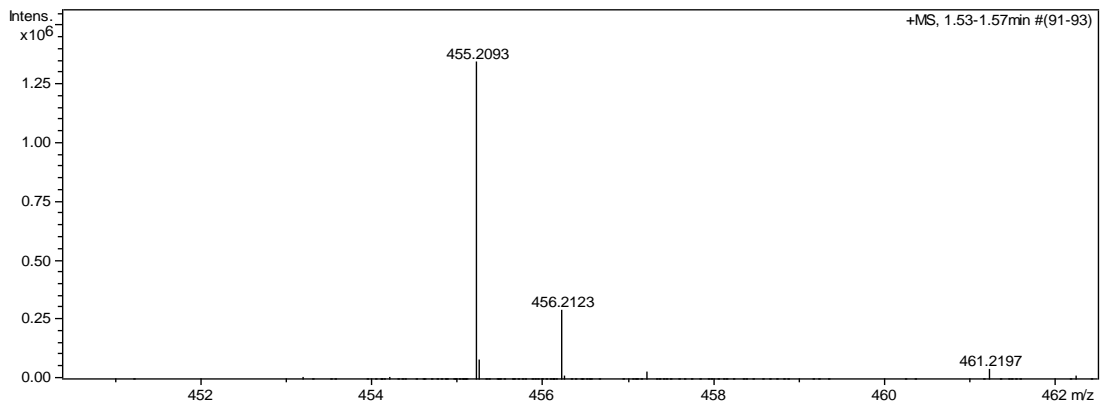

***rel*-(3*S*,3'*R*)-1-butyl-5,6'-dimethyl-2,5',7'-trioxo-1'-phenyl-1',2',3',5',6',7'-hexahydrospiro  
[indoline-3,4'-pyrrolo[3,4-*b*]pyridine]-3'-carbonitrile (4f):**

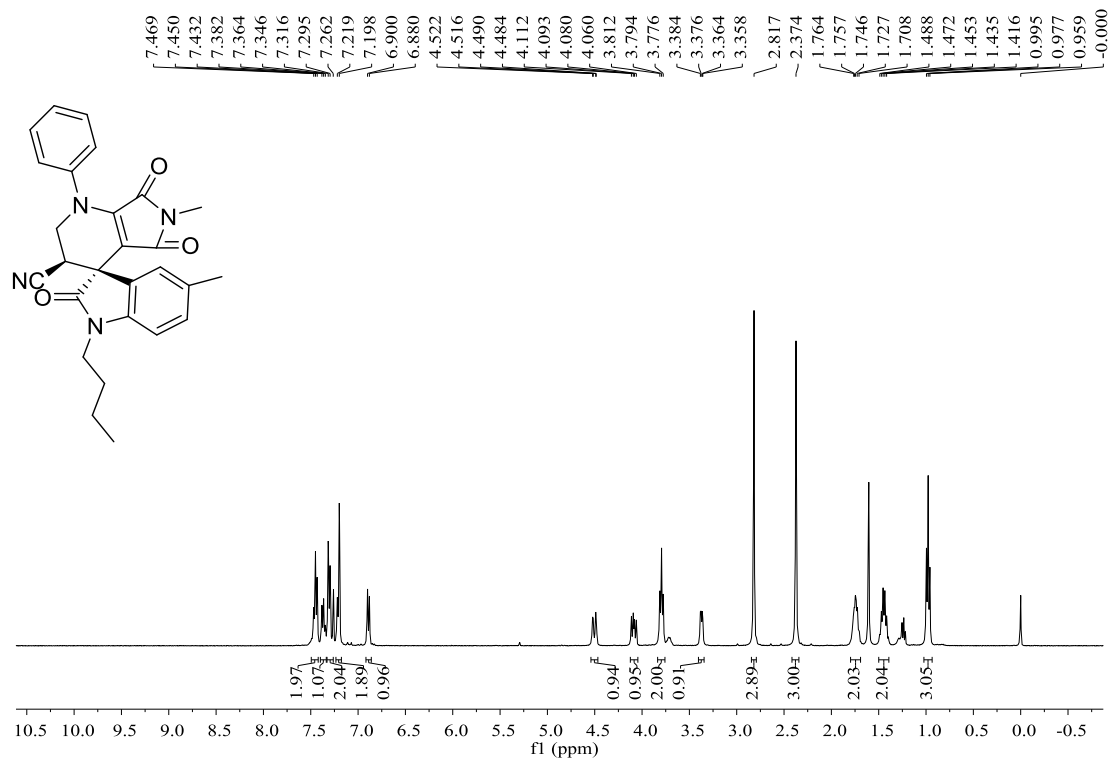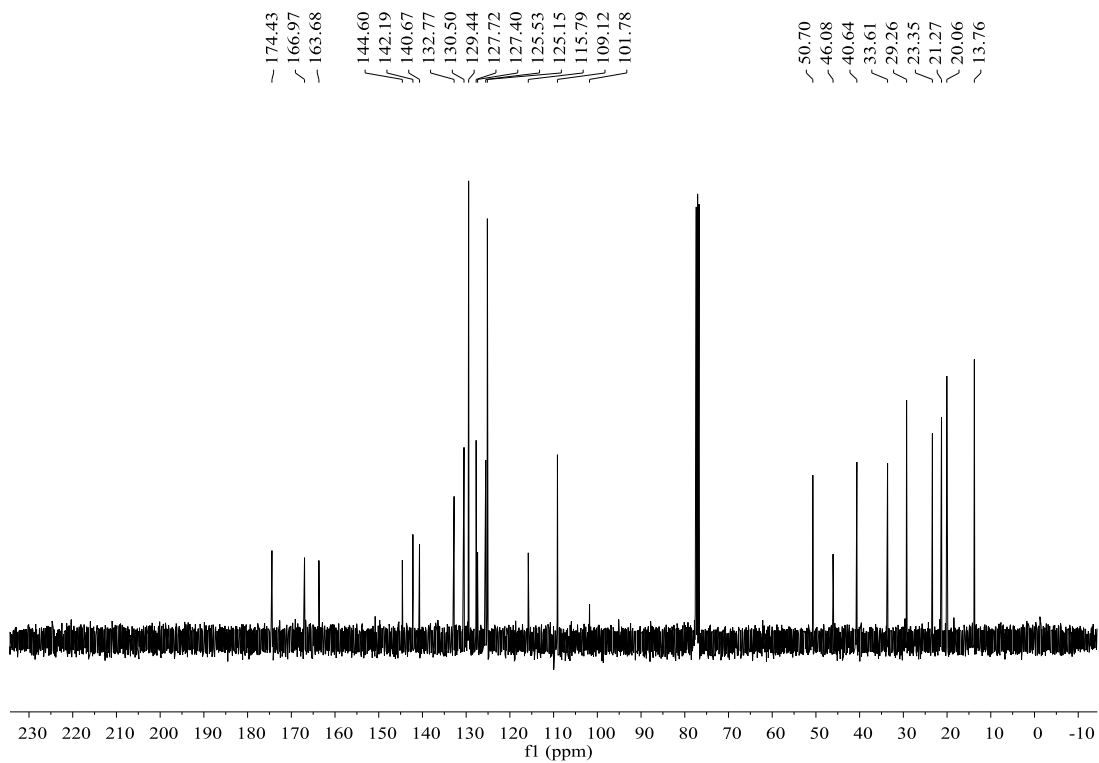

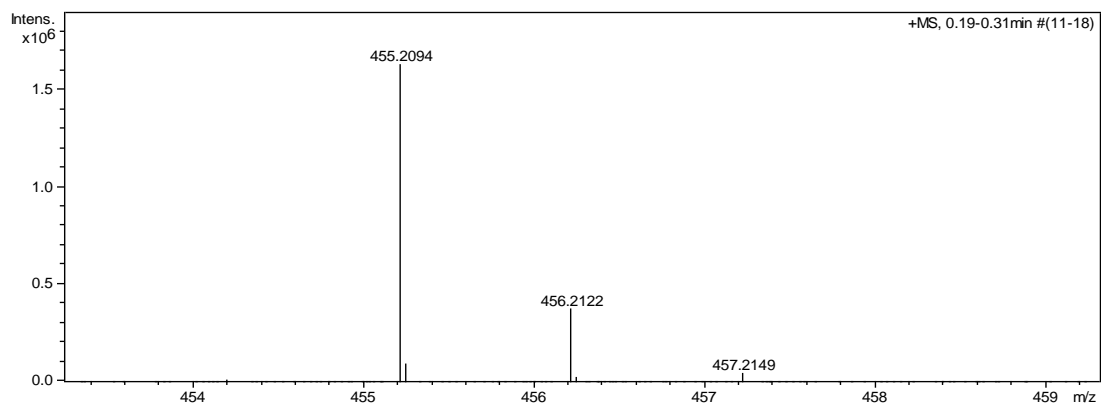

***rel*-(3*S*,3'*R*)-1-butyl-5-fluoro-6'-methyl-2,5',7'-trioxo-1'-phenyl-1',2',3',5',6',7'-hexahydro-spiro[indoline-3,4'-pyrrolo[3,4-*b*]pyridine]-3'-carbonitrile (4g')**:

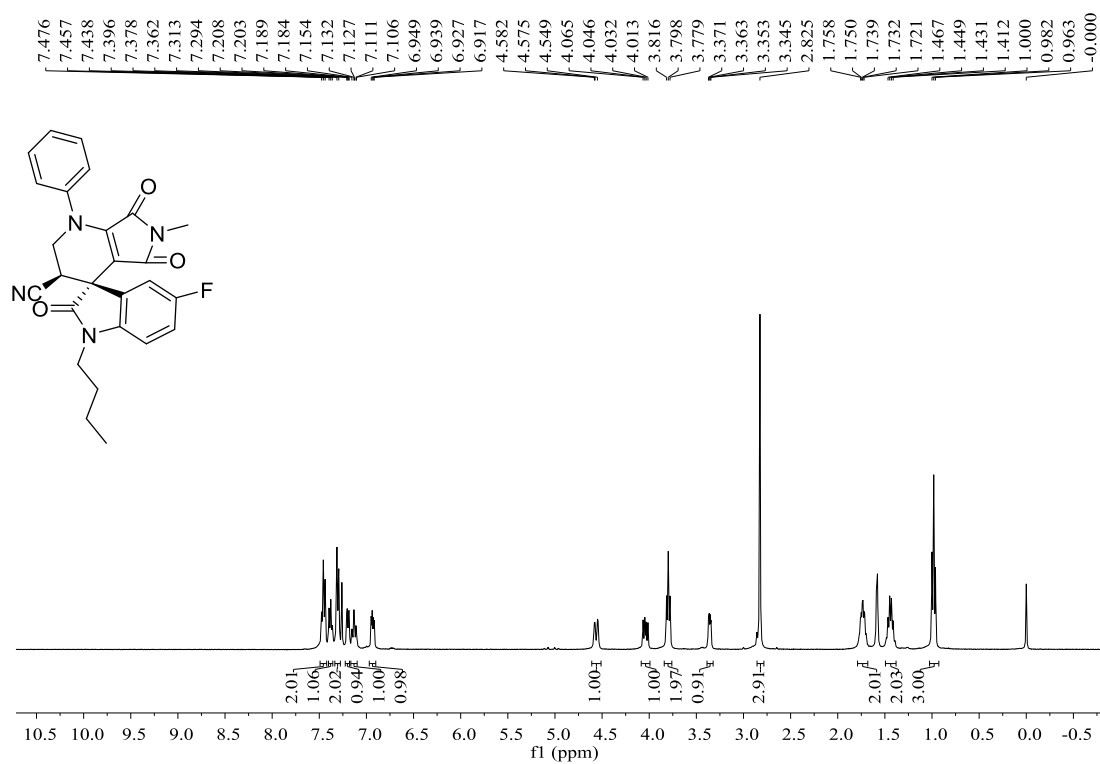



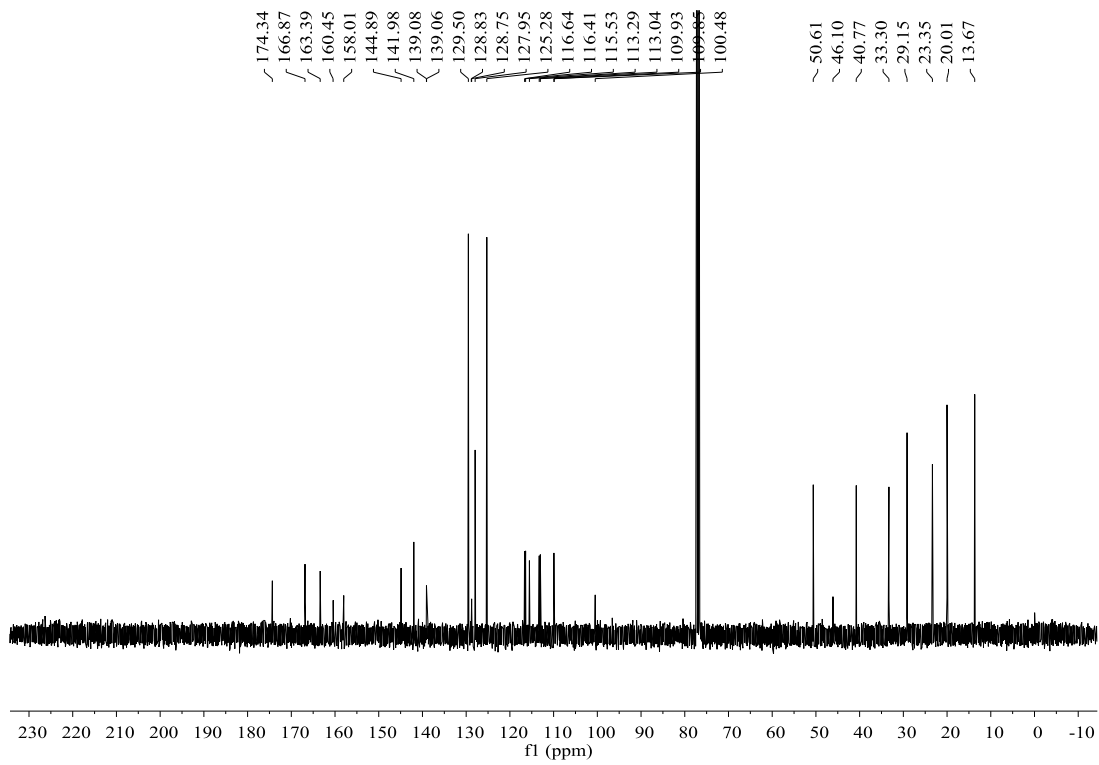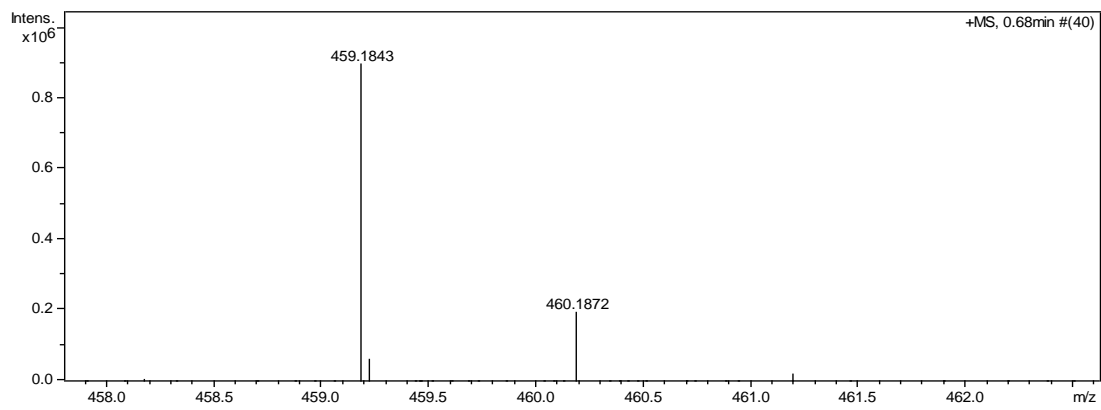

***rel*-(3*aR*,8*R*,8*aS*)-1'-benzyl-4-(4-chlorophenyl)-2,6-dimethyl-3*a*,8*a*-dihydro-1*H*-spiro[dipyrrol  
o[3,4-*b*:3',4'-*e*]pyridine-8,3'-indoline]-1,2',3,5,7(2*H*,4*H*,6*H*)-pentaone (5a):**

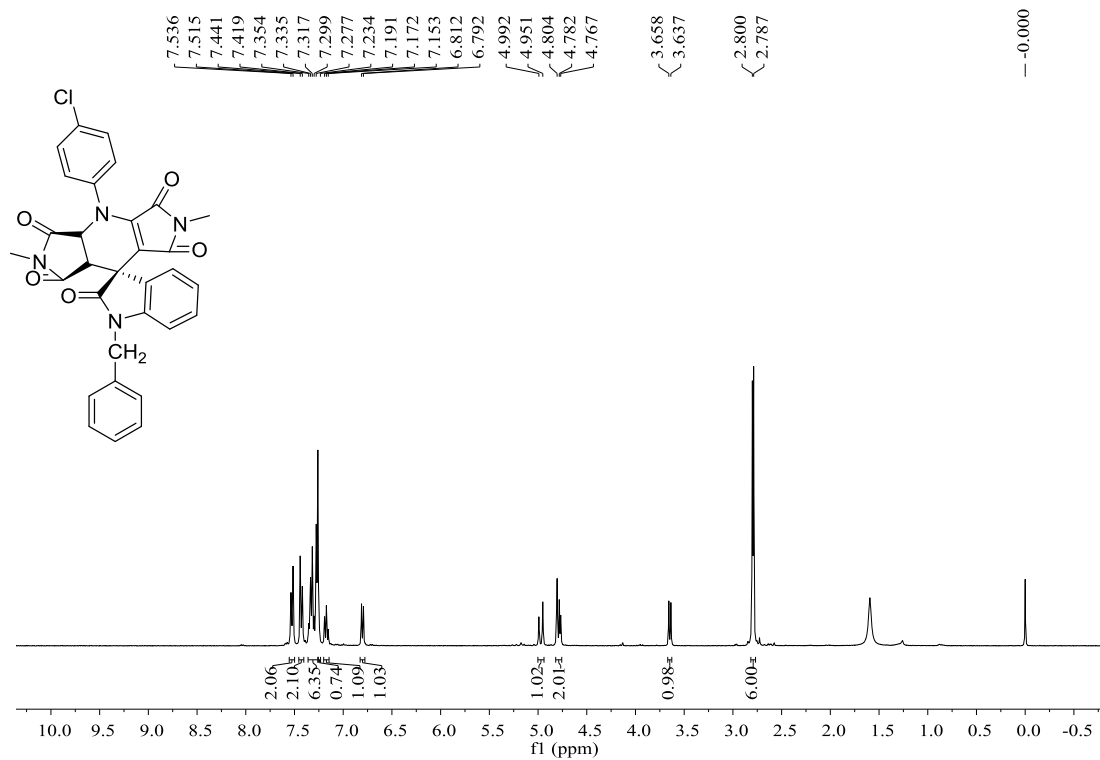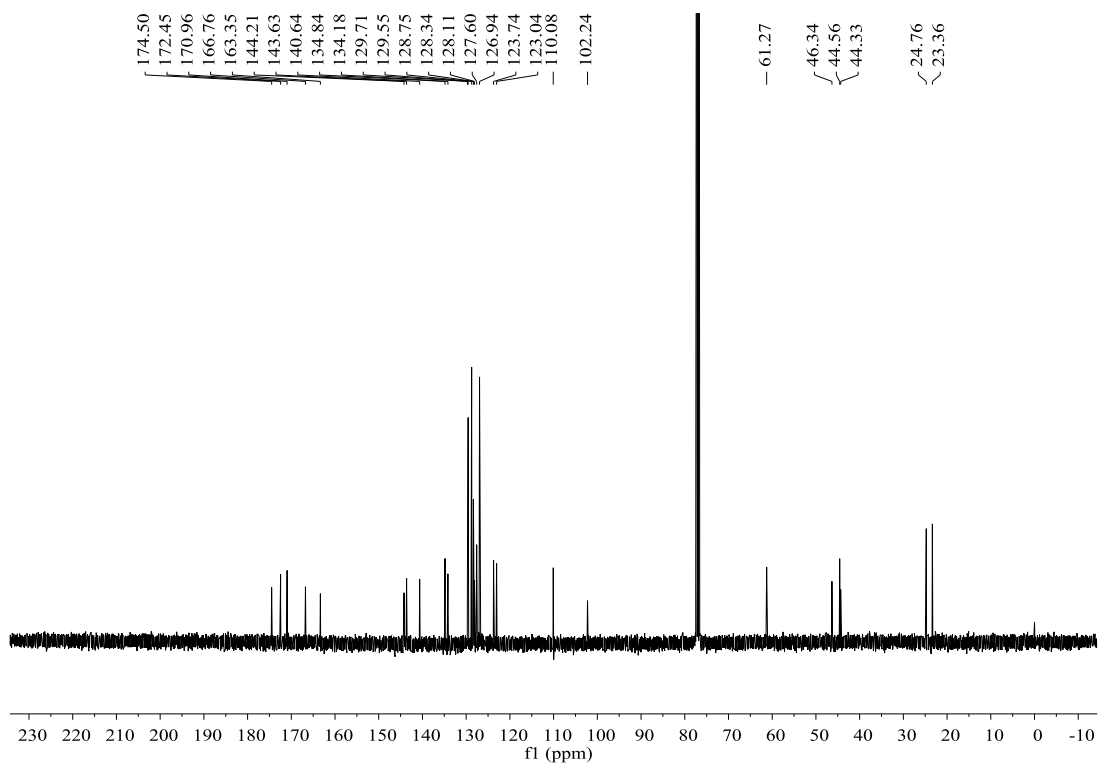

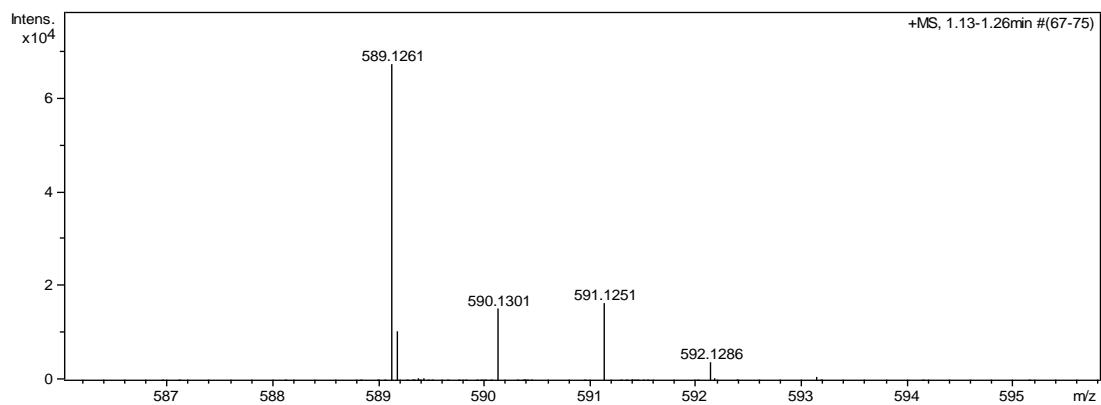

***rel*-(3*aR*,8*S*,8*aS*)-1'-benzyl-4-(4-chlorophenyl)-2,6-dimethyl-3*a*,8*a*-dihydro-1*H*-spiro[dipyrrolo[3,4-*b*:3',4'-*e*]pyridine-8,3'-indoline]-1,2',3,5,7(2*H*,4*H*,6*H*)-pentaone (5*a*')**:

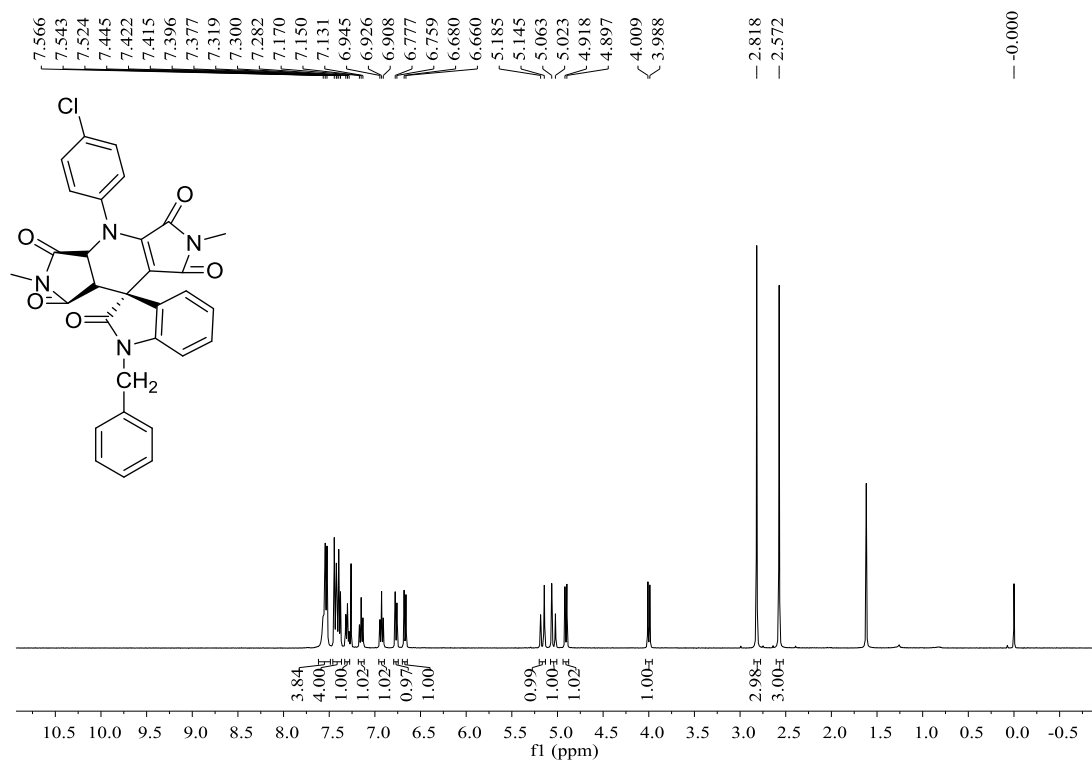

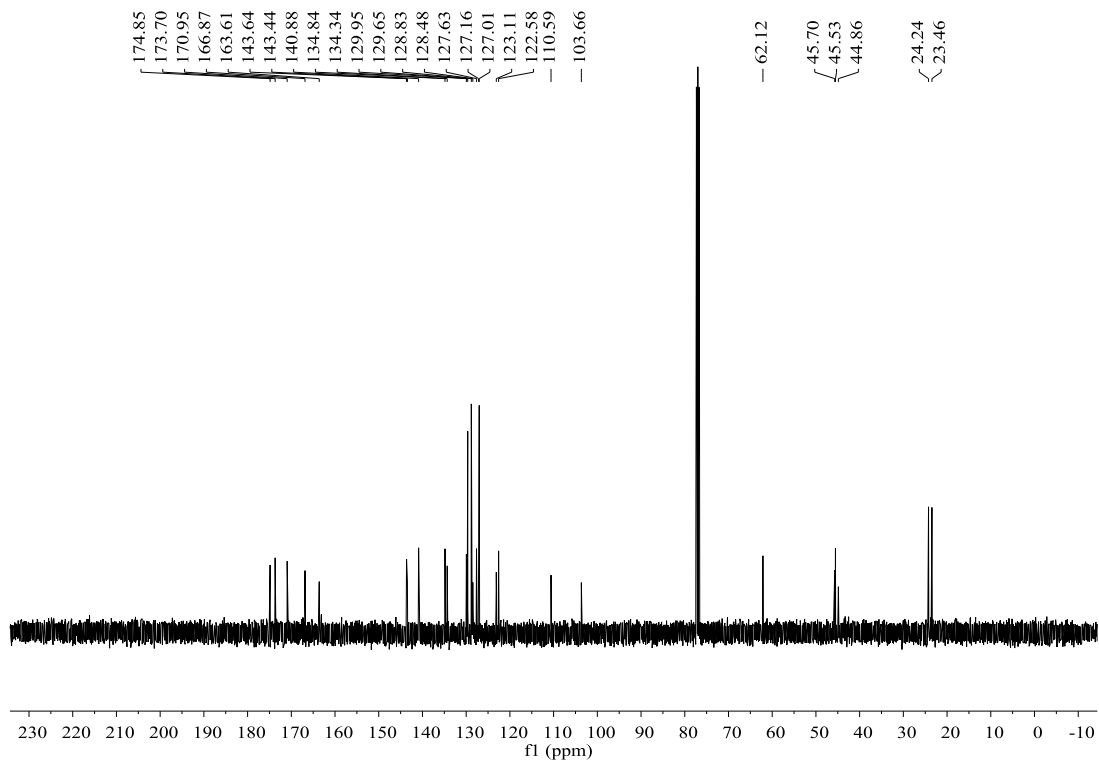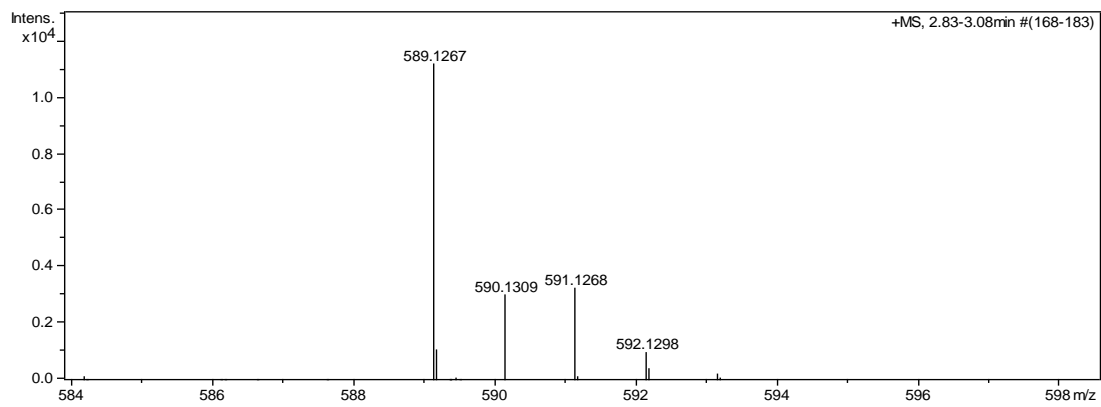

***rel*-(3*aR*,8*S*,8*aS*)-1'-benzyl-2,5',6-trimethyl-4-phenyl-3*a*,8*a*-dihydro-1*H*-spiro[dipyrrolo[3,4-*b*:3',4'-*e*]pyridine-8,3'-indoline]-1,2',3,5,7(2*H*,4*H*,6*H*)-pentaone (5*b*')**:

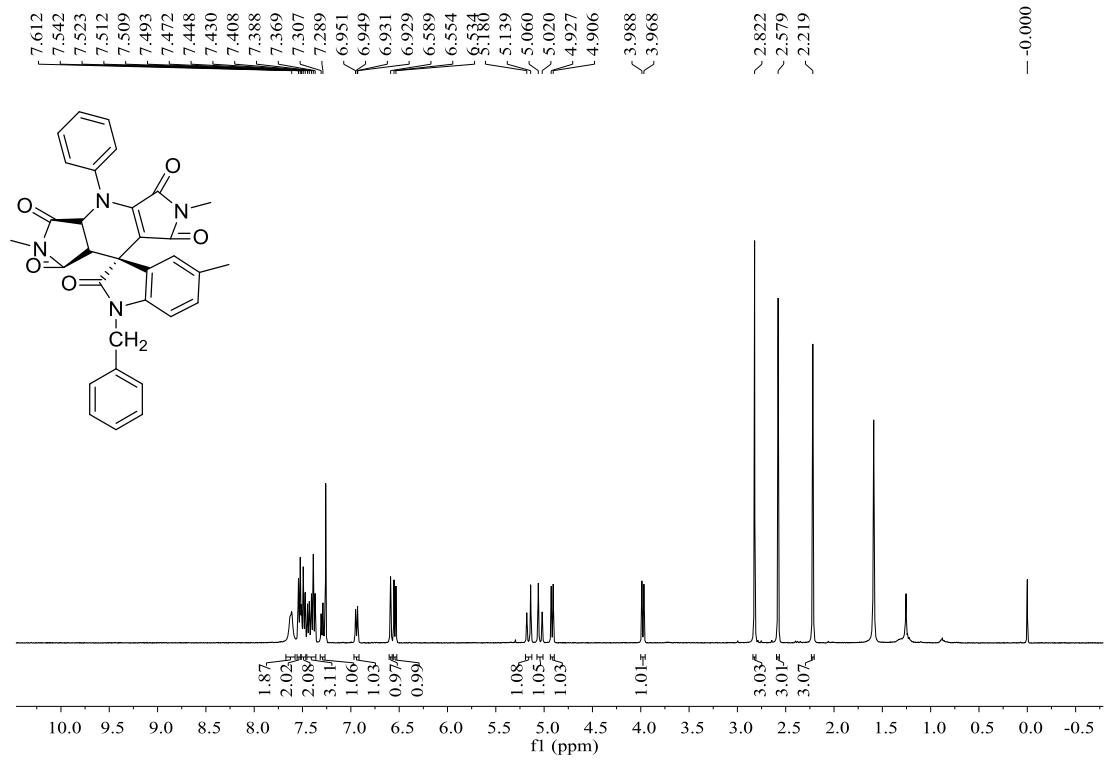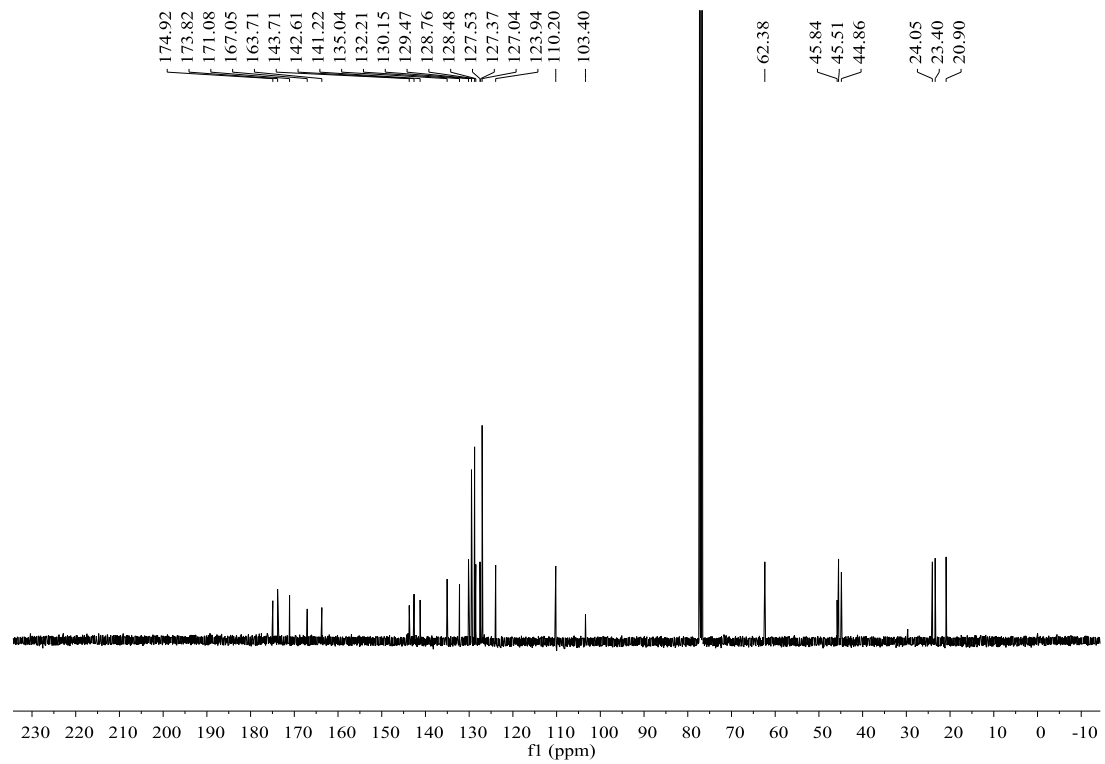

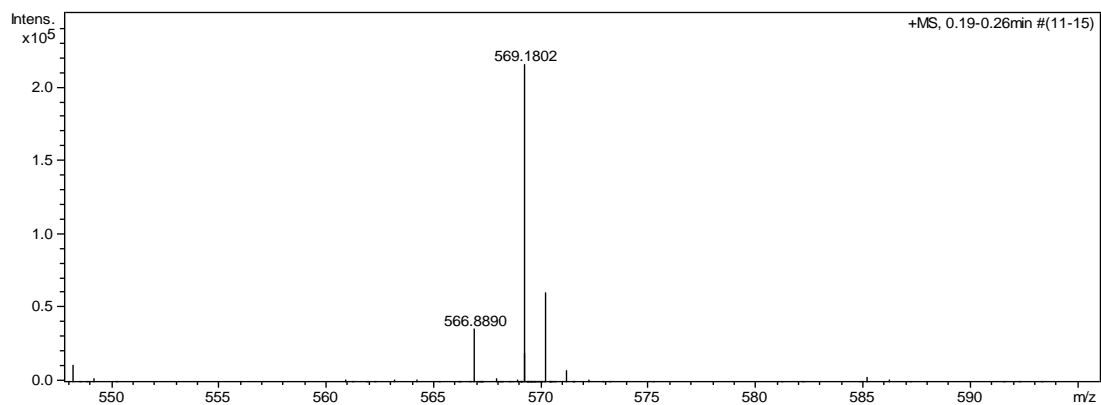

***rel*-(3*aR*,8*R*,8*aS*)-1'-benzyl-4-(4-chlorophenyl)-2,5',6-trimethyl-3*a*,8*a*-dihydro-1*H*-spiro[dipyrrolo [3,4-*b*:3',4'-*e*]pyridine-8,3'-indoline]-1,2',3,5,7(2*H*,4*H*,6*H*)-pentaone (5c):**

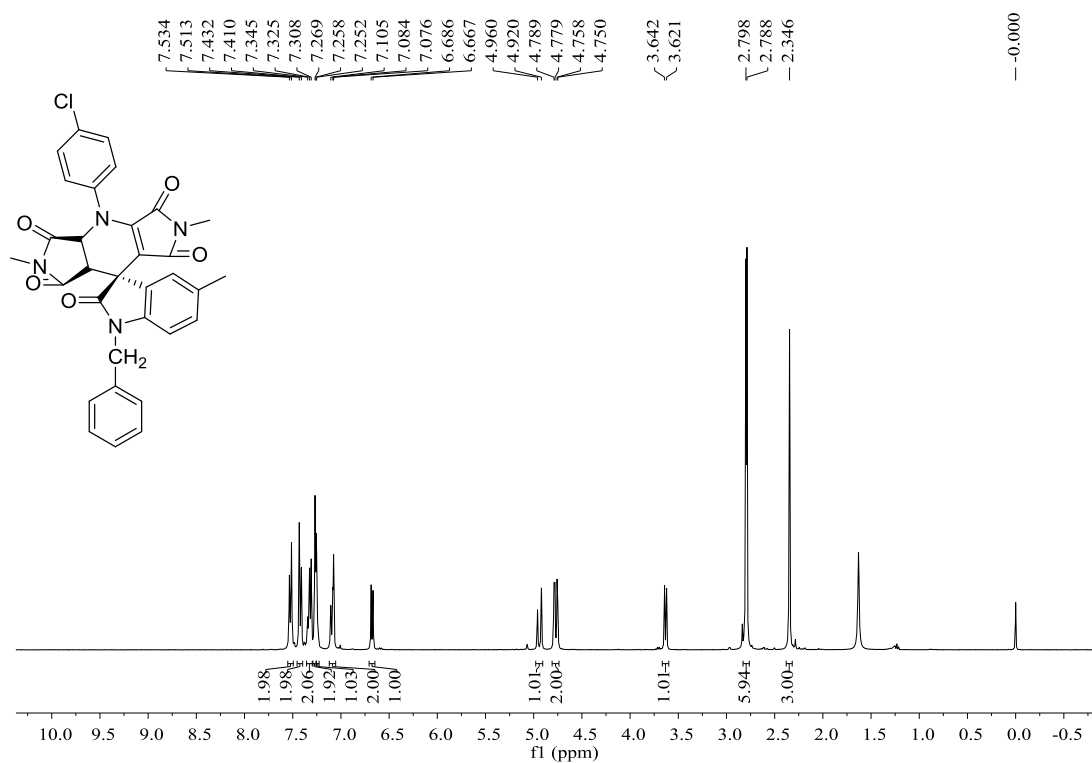

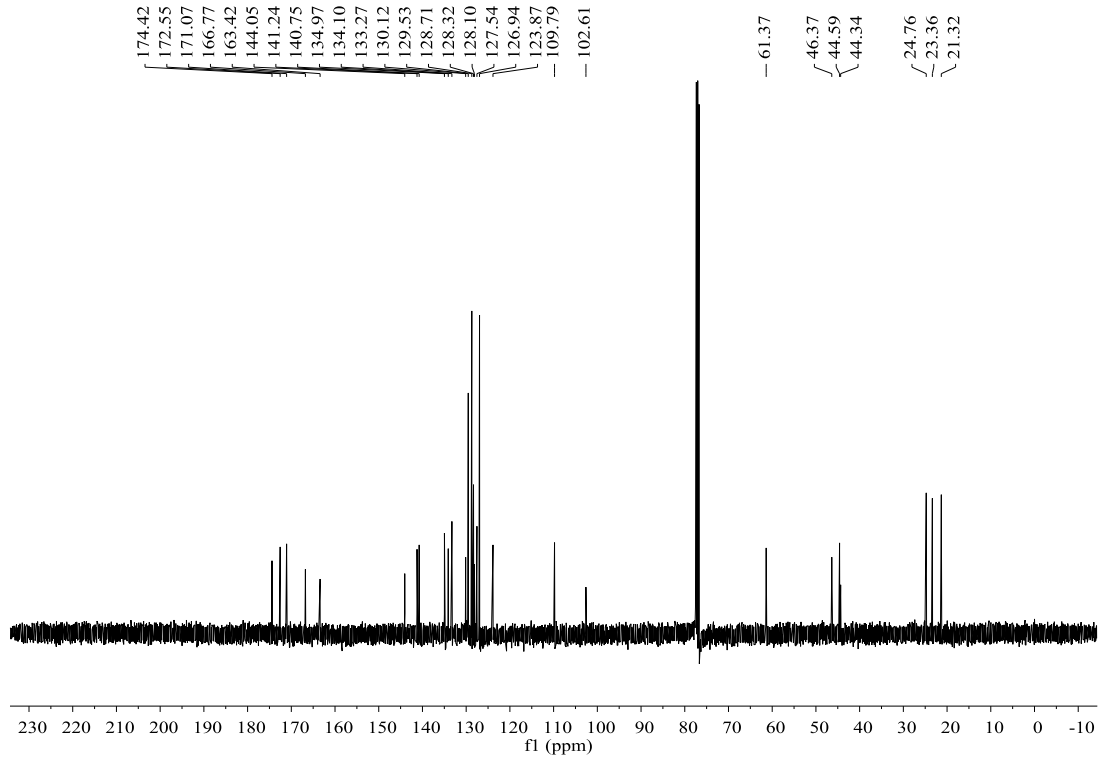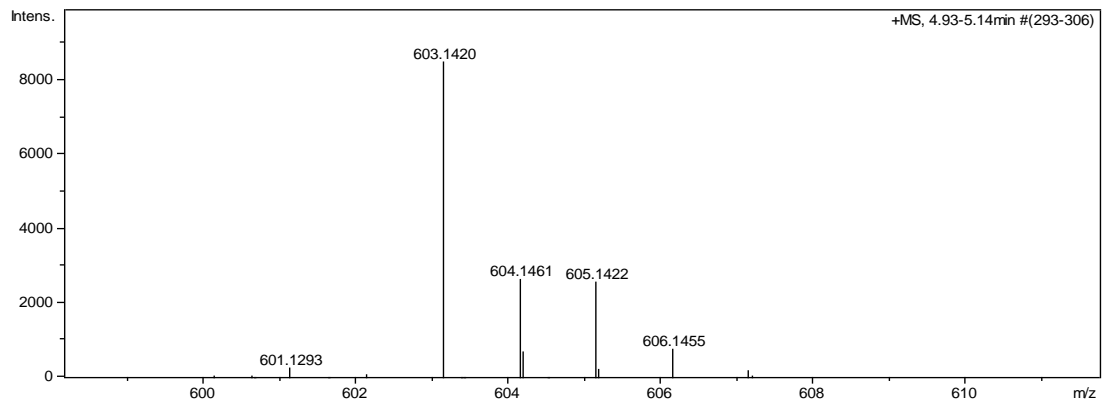

***rel*-(3*aR*,8*S*,8*aS*)-1'-benzyl-4-(4-chlorophenyl)-2,5',6-trimethyl-3*a*,8*a*-dihydro-1*H*-spiro[dipyrrolo [3,4-*b*:3',4'-*e*]pyridine-8,3'-indoline]-1,2',3,5,7(2*H*,4*H*,6*H*)-pentaone (5*c'*):**

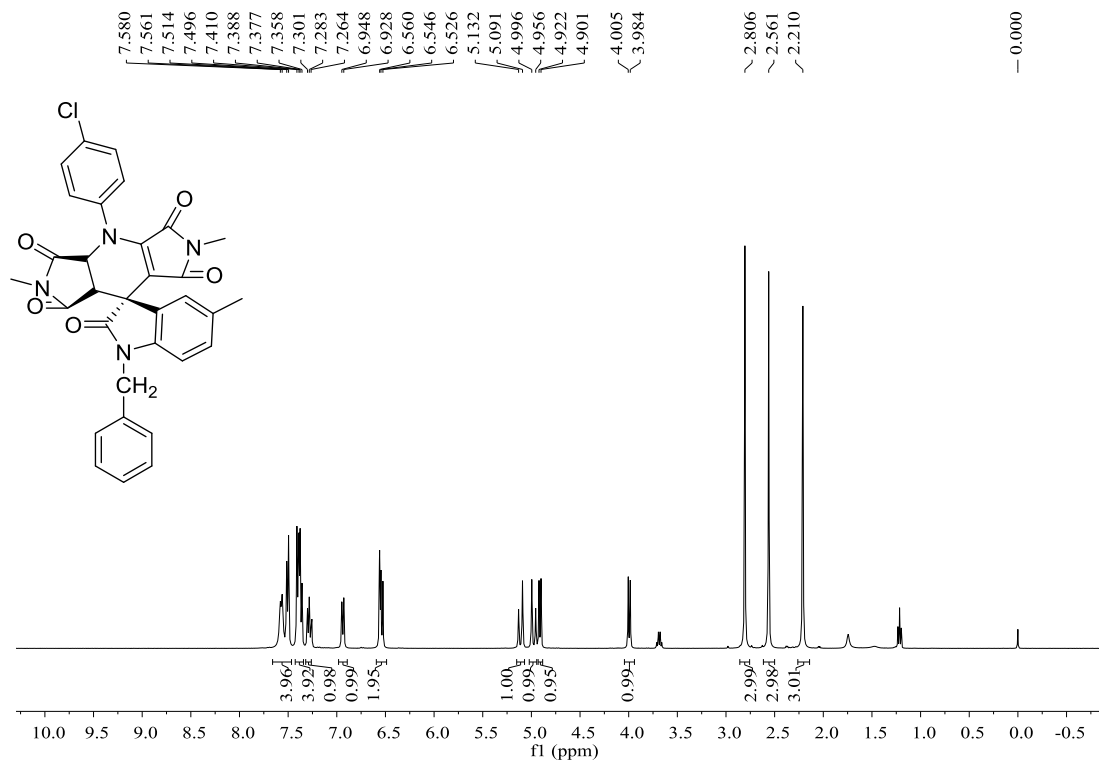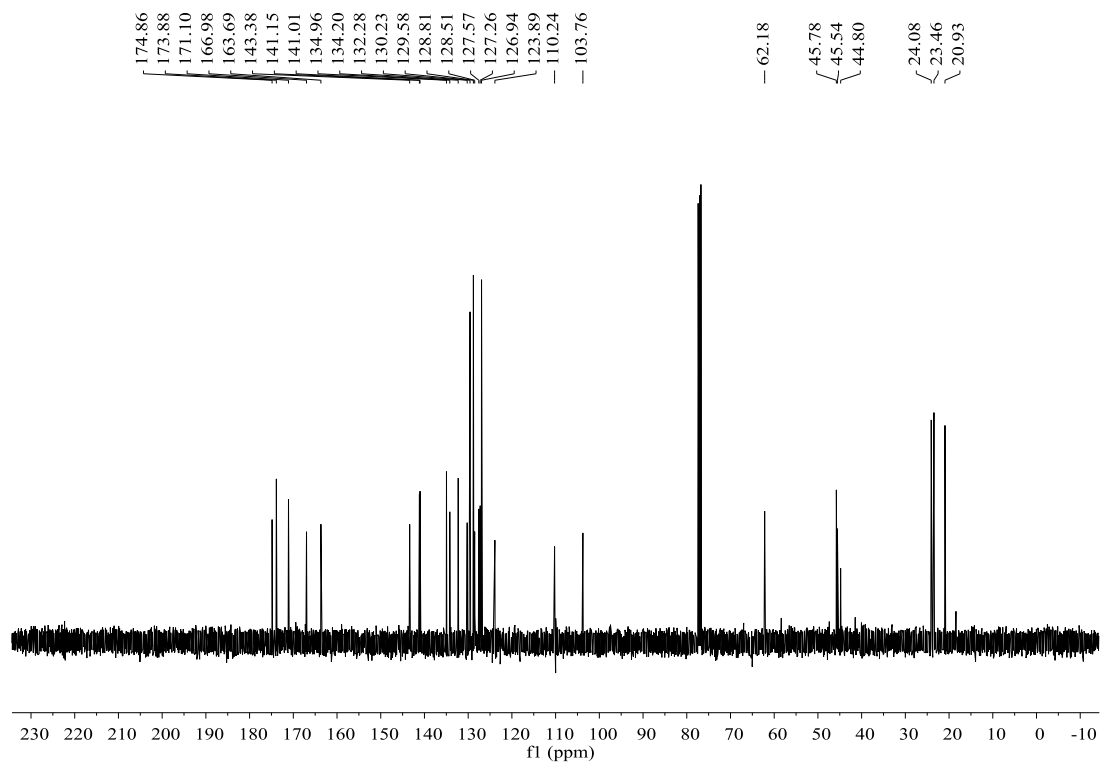



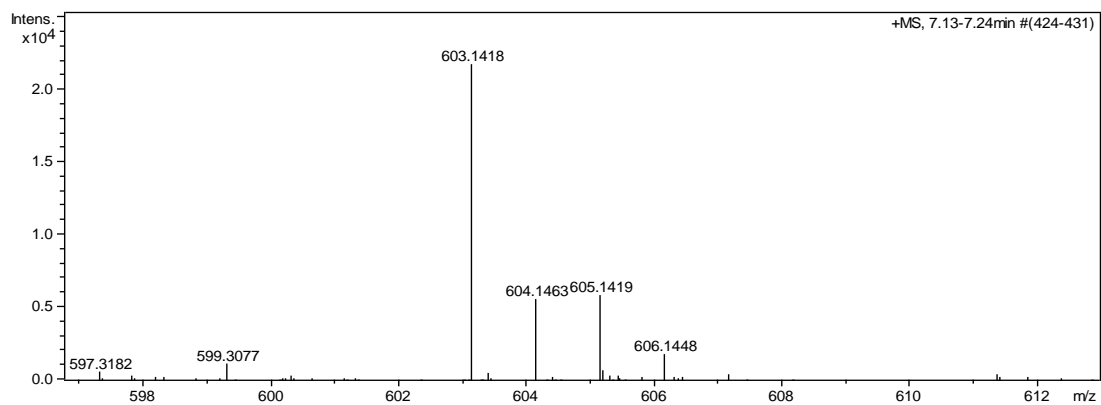

***rel*-(3*aR*,8*R*,8*aS*)-1'-benzyl-5'-chloro-4-(4-methoxyphenyl)-2,6-dimethyl-3*a*,8*a*-dihydro-1*H*-spiro[di-pyrrolo[3,4-*b*:3',4'-*e*]pyridine-8,3'-indoline]-1,2',3,5,7(2*H*,4*H*,6*H*)-pentaone (5d):**

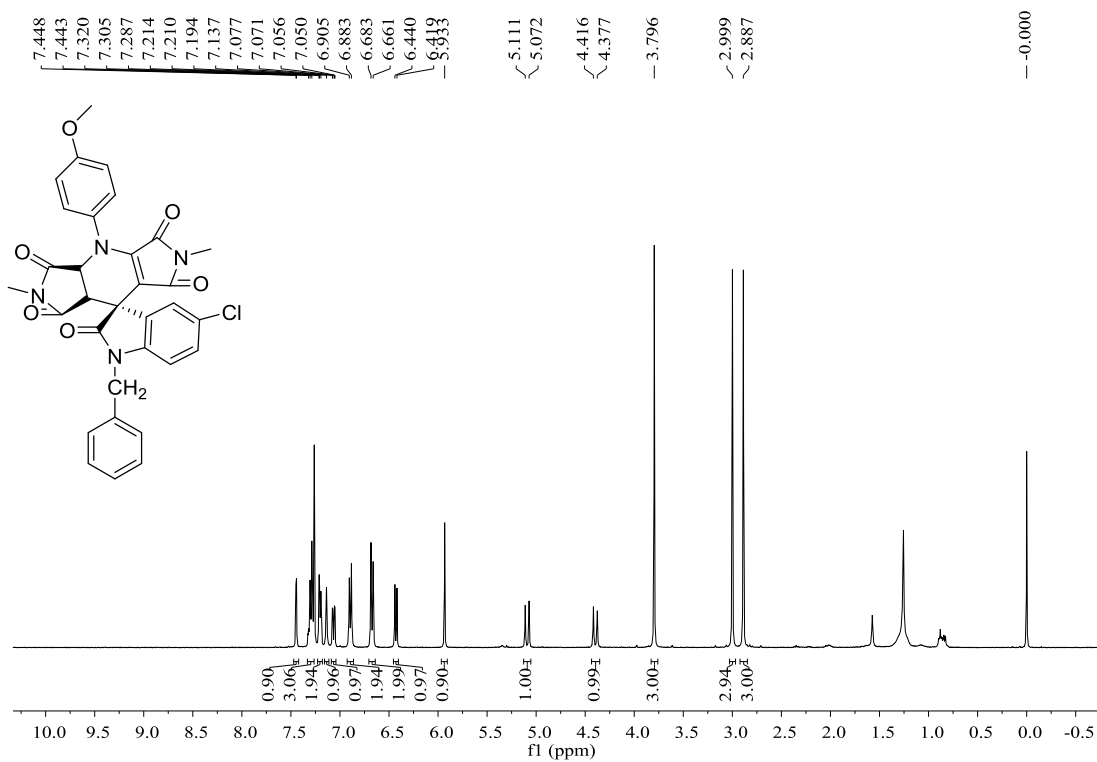

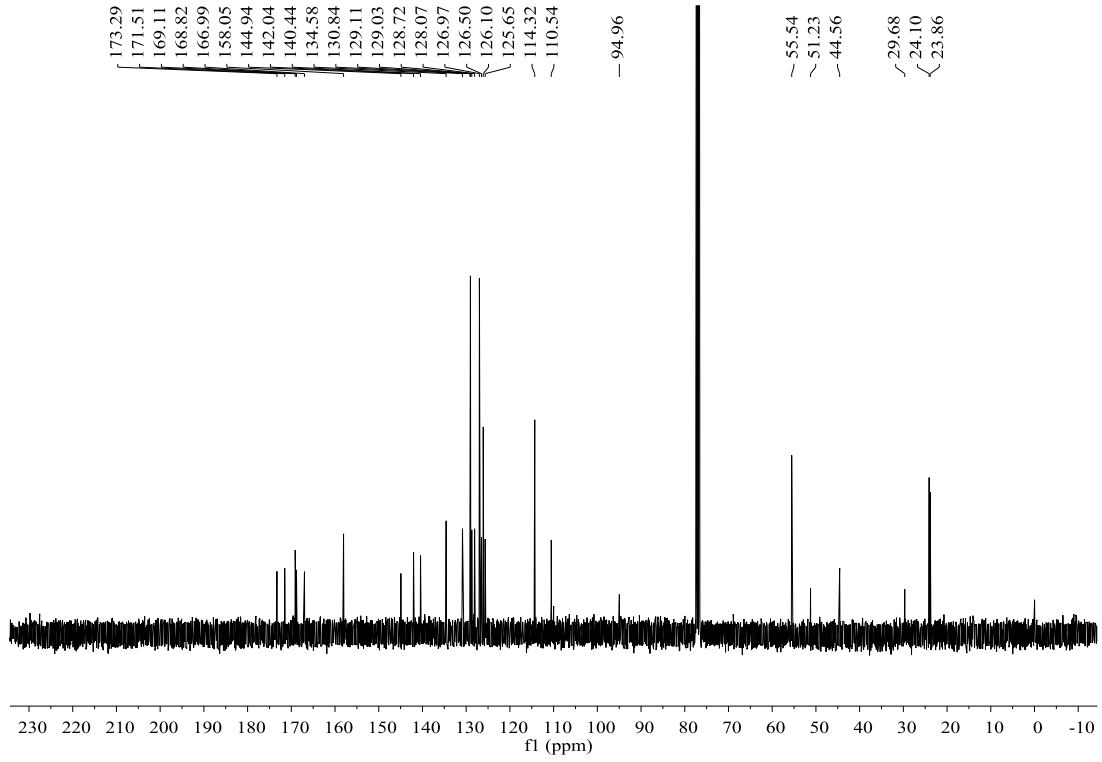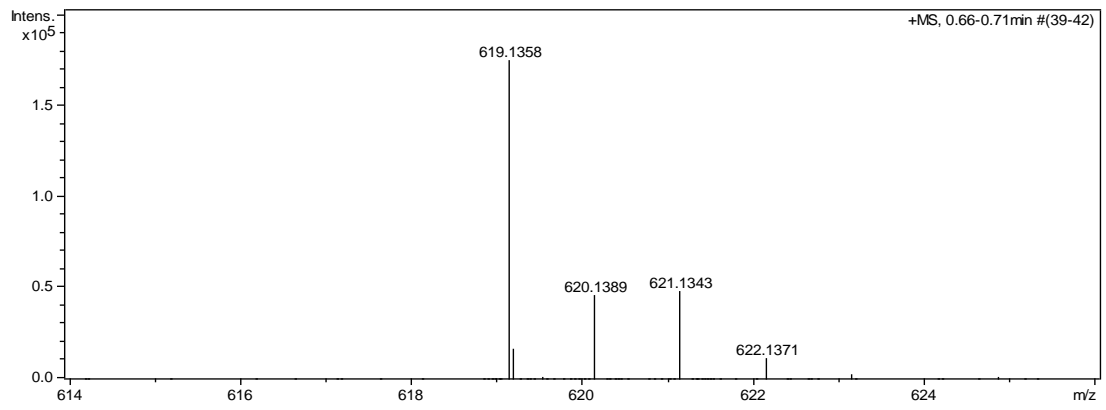

***rel*-(3*aR*,8*S*,8*aS*)-1'-benzyl-5'-chloro-4-(4-methoxyphenyl)-2,6-dimethyl-3*a*,8*a*-dihydro-1*H*-spiro[di-pyrrolo[3,4-*b*:3',4'-*e*]pyridine-8,3'-indoline]-1,2',3,5,7(2*H*,4*H*,6*H*)-pentaone (5*d*'):**

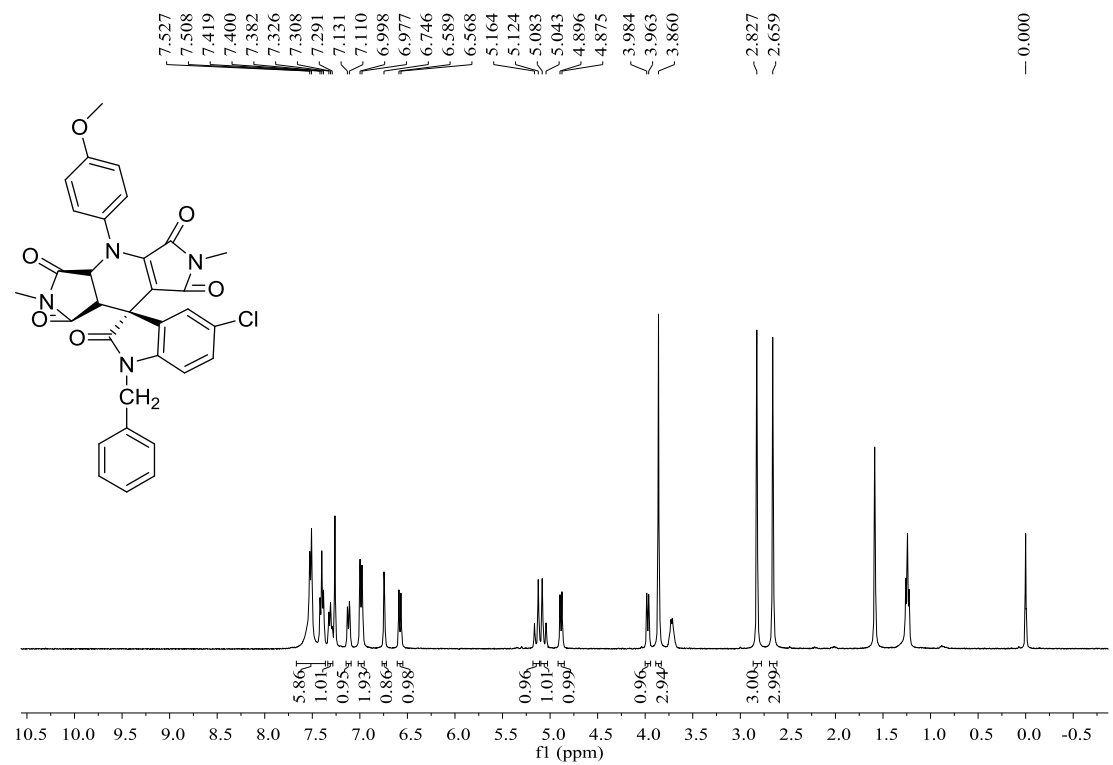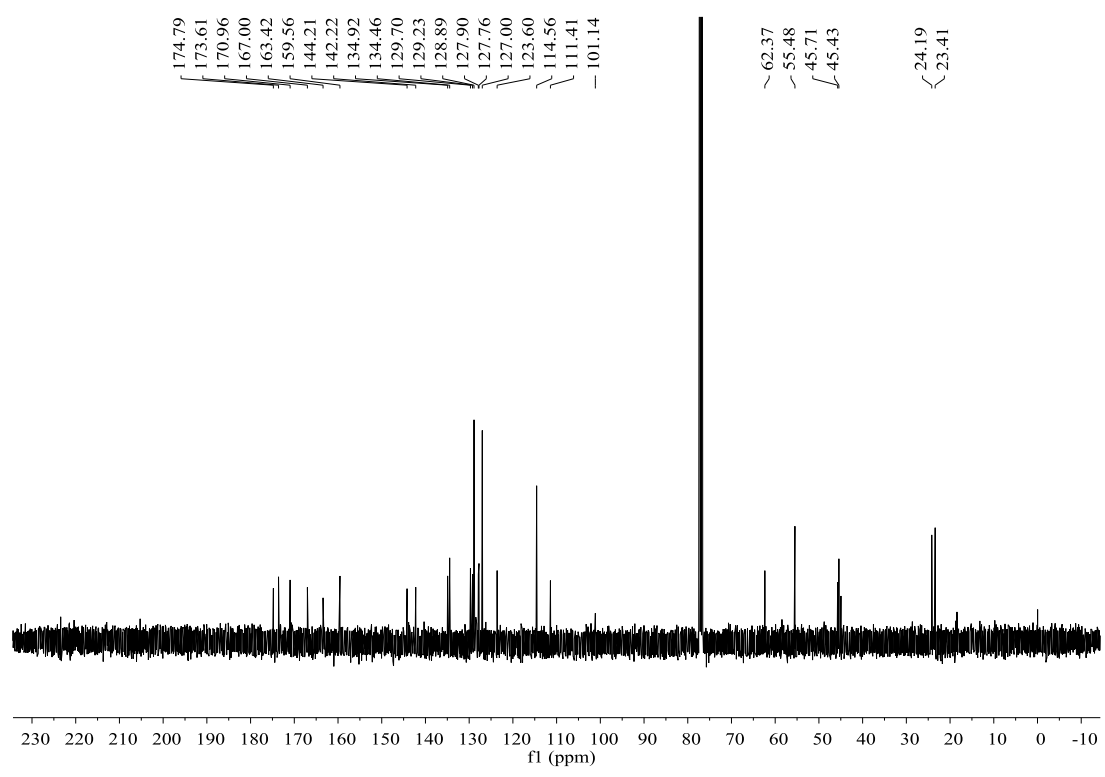

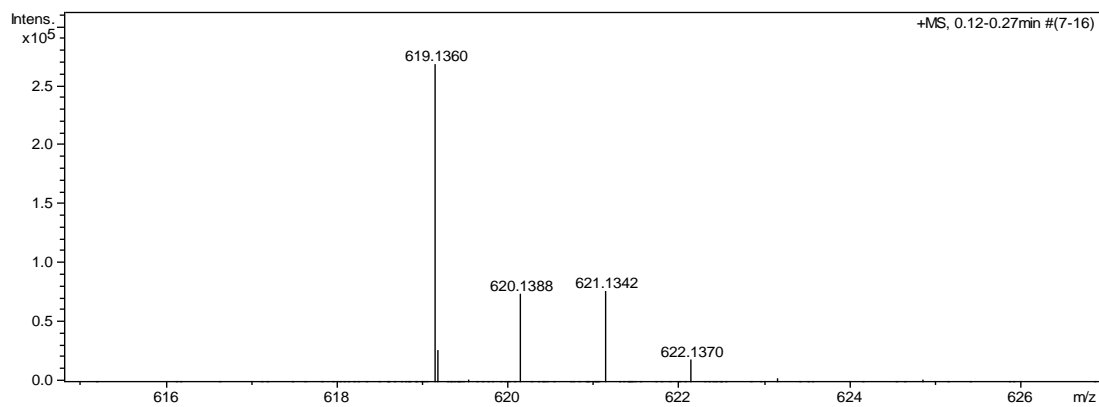

***rel*-(3*aR*,8*R*,8*aS*)-1'-butyl-2,5',6-trimethyl-4-phenyl-3*a*,8*a*-dihydro-1*H*-spiro[dipyrrolo[3,4-*b*:3',4'-*e*]pyridine-8,3'-indoline]-1,2',3,5,7(2*H*,4*H*,6*H*)-pentaone (5e):**

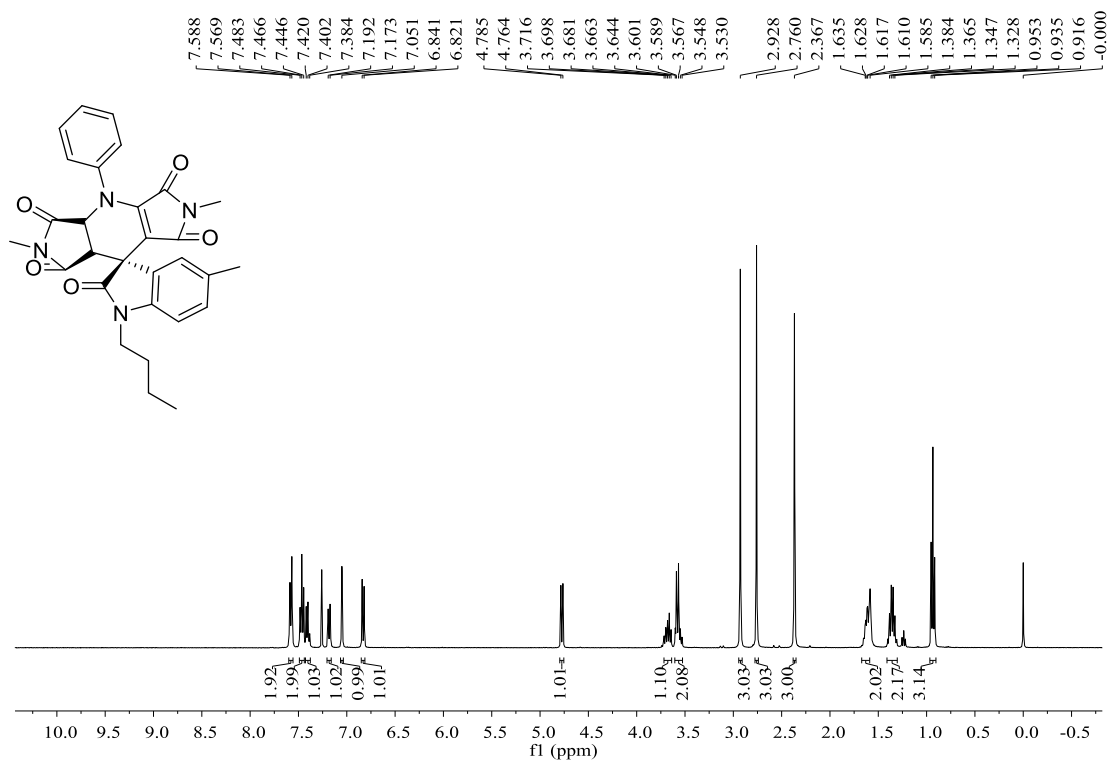

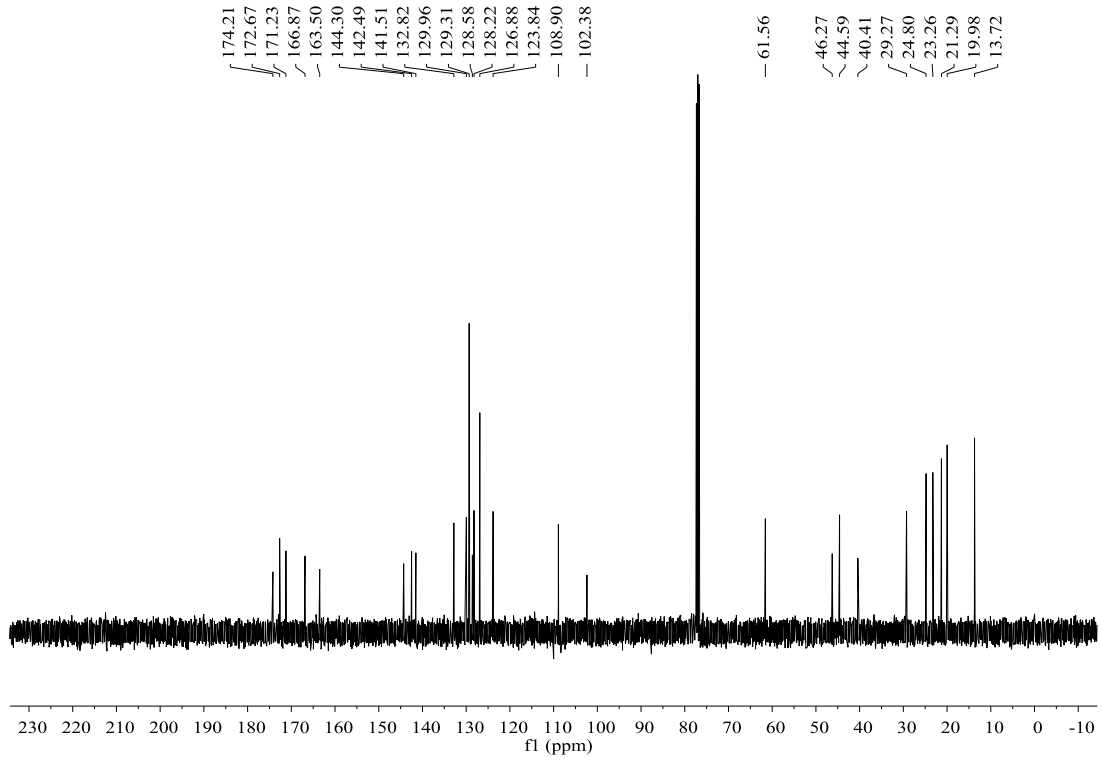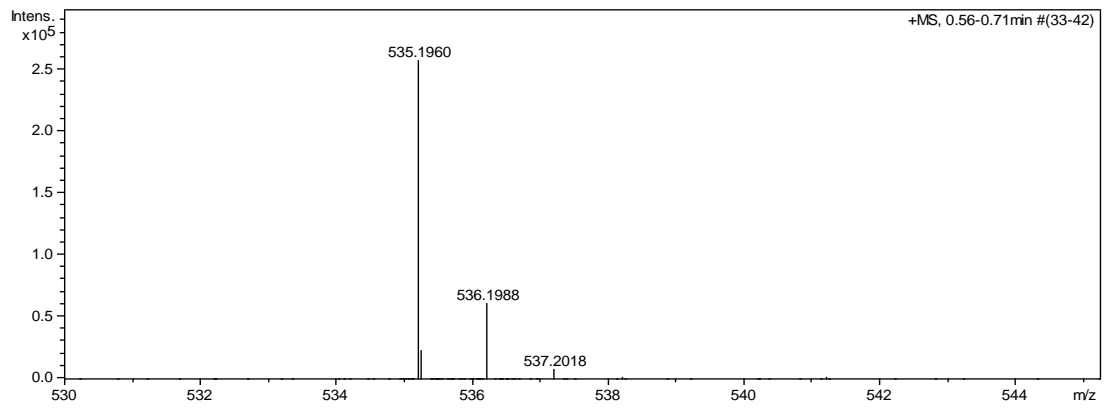

***rel*-(3*aR*,8*S*,8*aS*)-1'-butyl-2,5',6-trimethyl-4-phenyl-3*a*,8*a*-dihydro-1*H*-spiro[dipyrrolo[3,4-*b*:3',4'-*e*]pyridine-8,3'-indoline]-1,2',3,5,7(2*H*,4*H*,6*H*)-pentaone (5*e*')**:

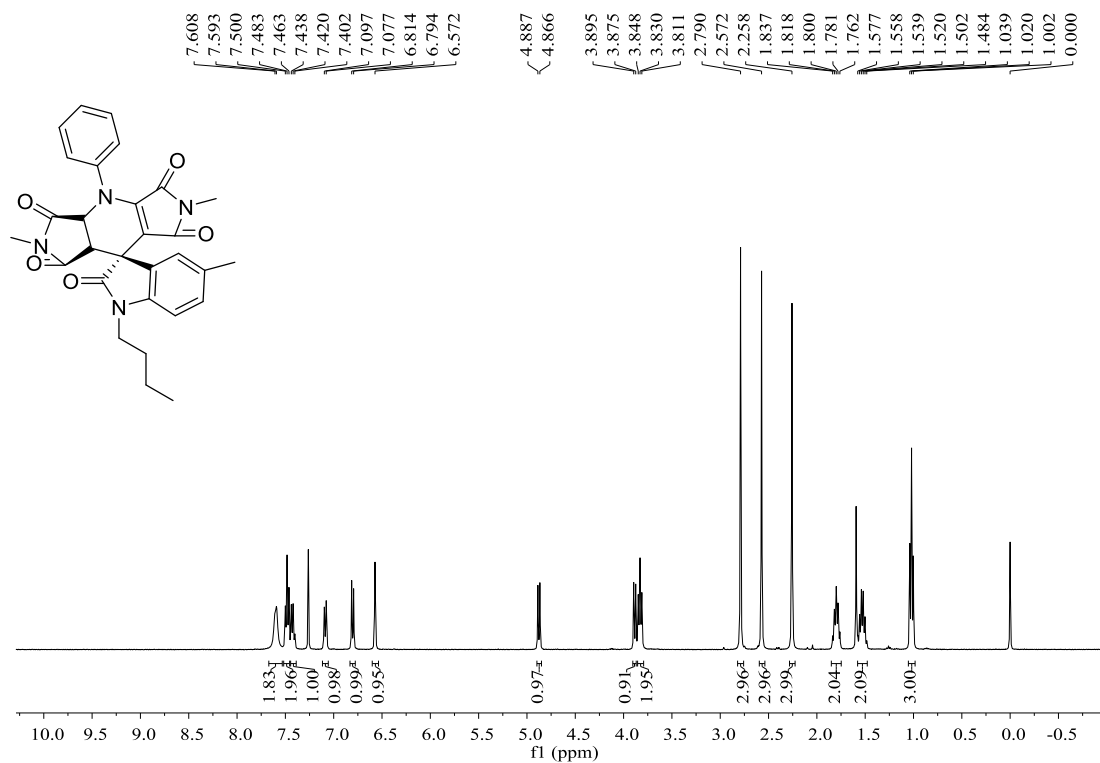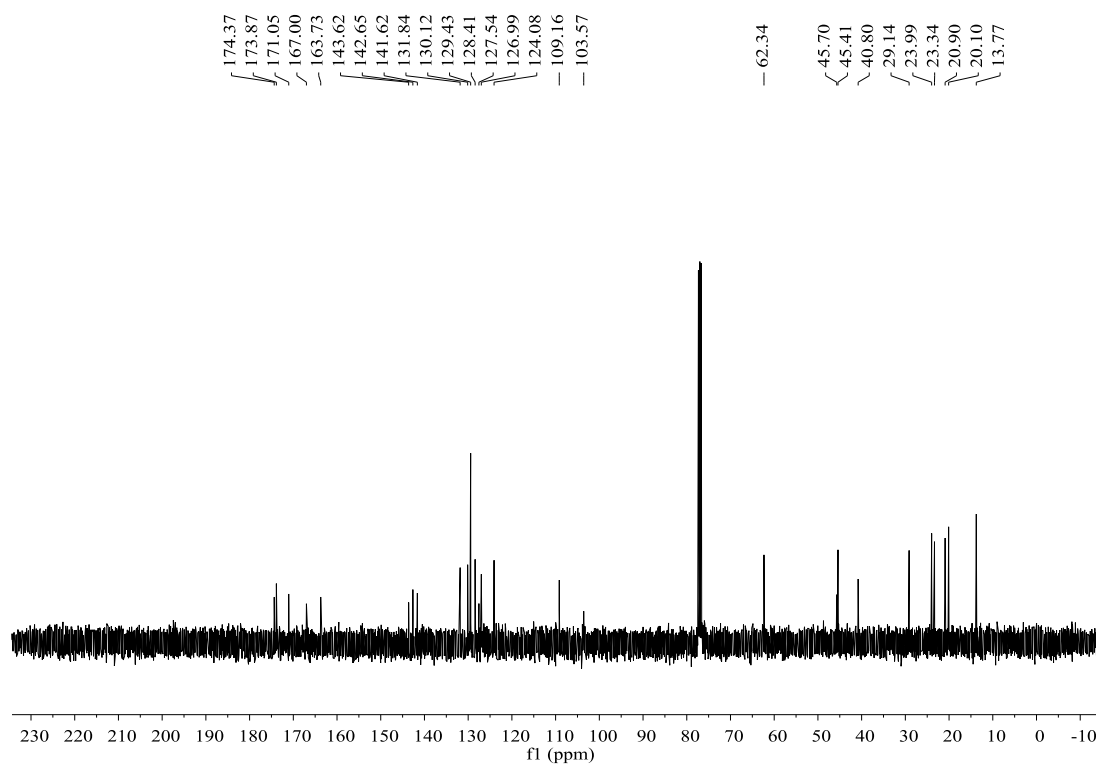

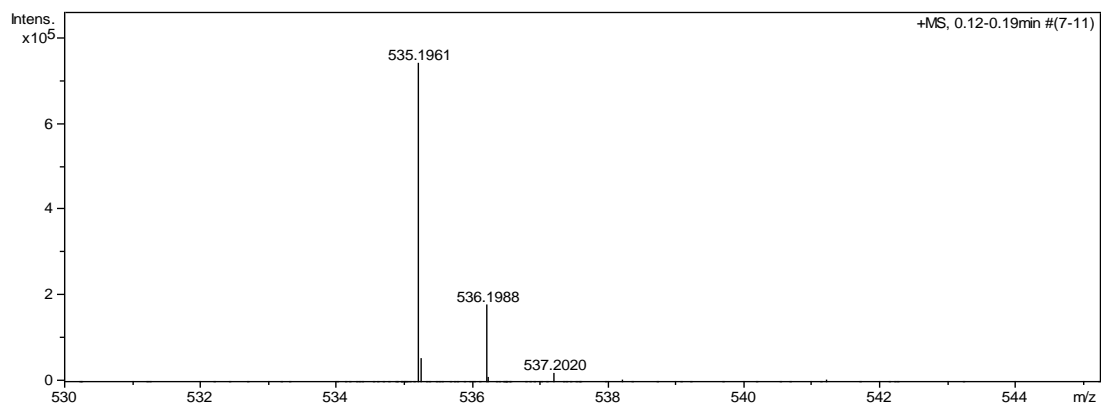

***rel*-(3*aR*,8*R*,8*aS*)-1'-butyl-4-(4-methoxyphenyl)-2,5',6-trimethyl-3*a*,8*a*-dihydro-1*H*-spiro[dipyrrolo[3,4-*b*:3',4'-*e*]pyridine-8,3'-indoline]-1,2',3,5,7(2*H*,4*H*,6*H*)-pentaone (5f):**

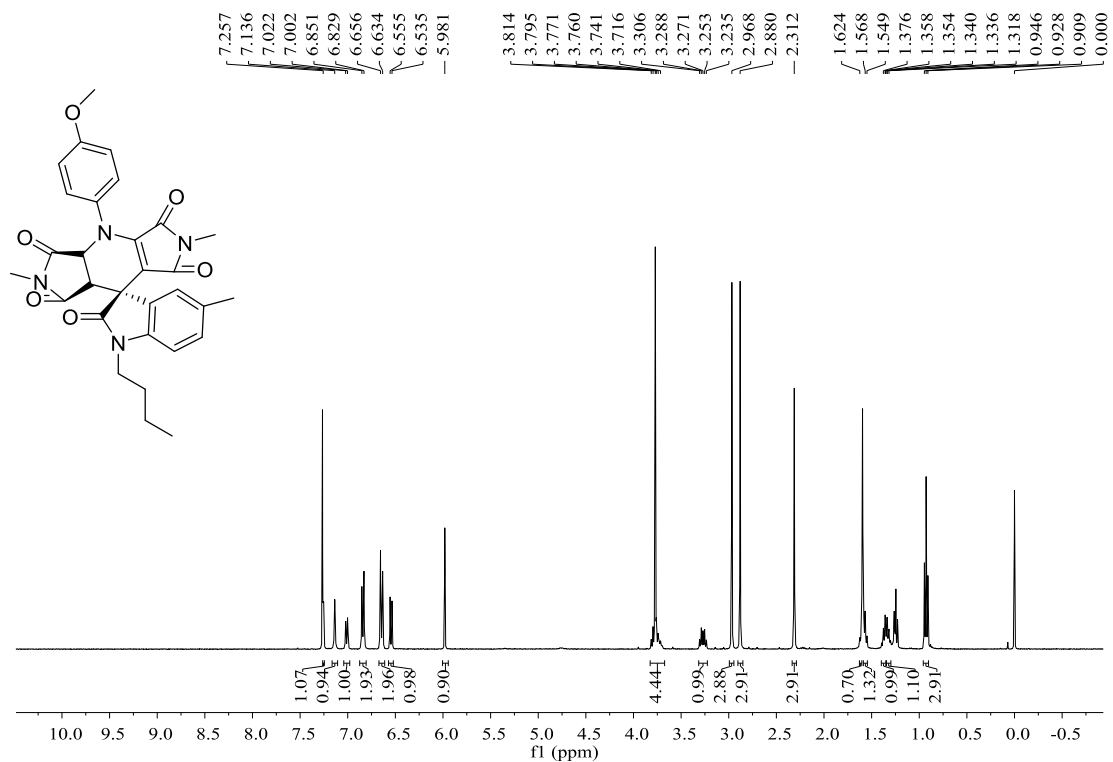

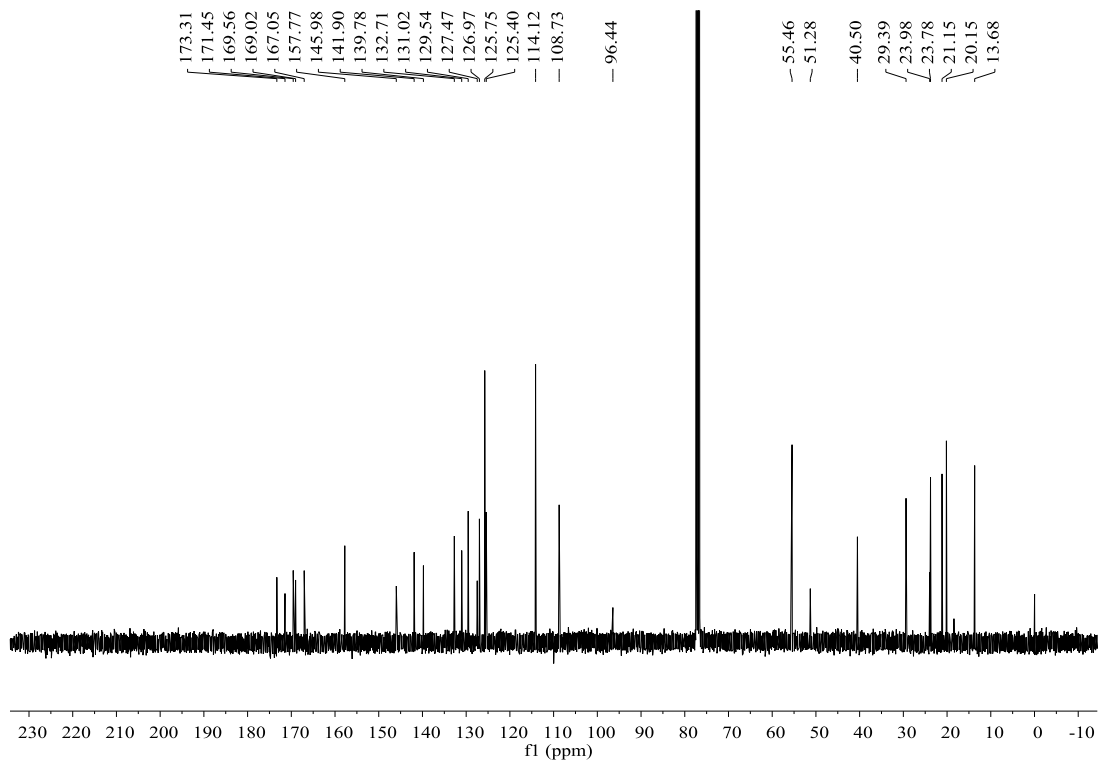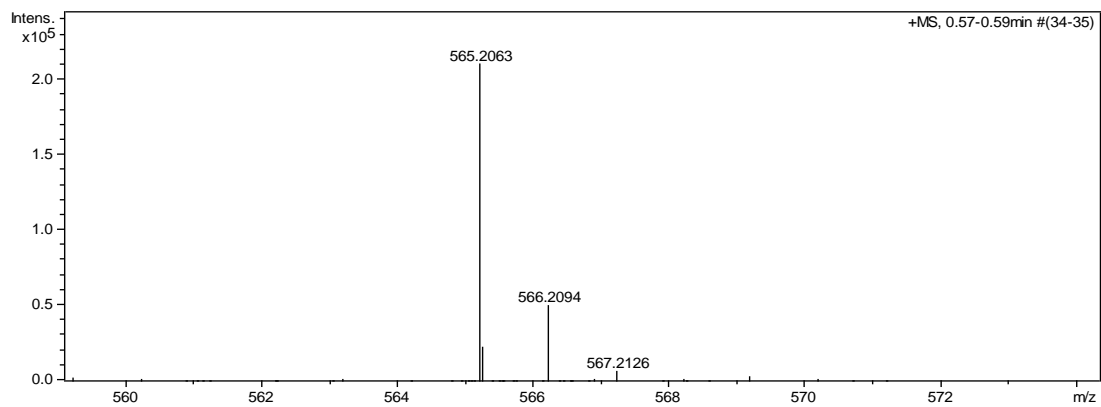



***rel*-(3*aR*,8*S*,8*aS*)-1'-butyl-4-(4-methoxyphenyl)-2,5',6-trimethyl-3*a*,8*a*-dihydro-1*H*-spiro  
[dipyrrolo[3,4-*b*:3',4'-*e*]pyridine-8,3'-indoline]-1,2',3,5,7(2*H*,4*H*,6*H*)-pentaone (5f):**

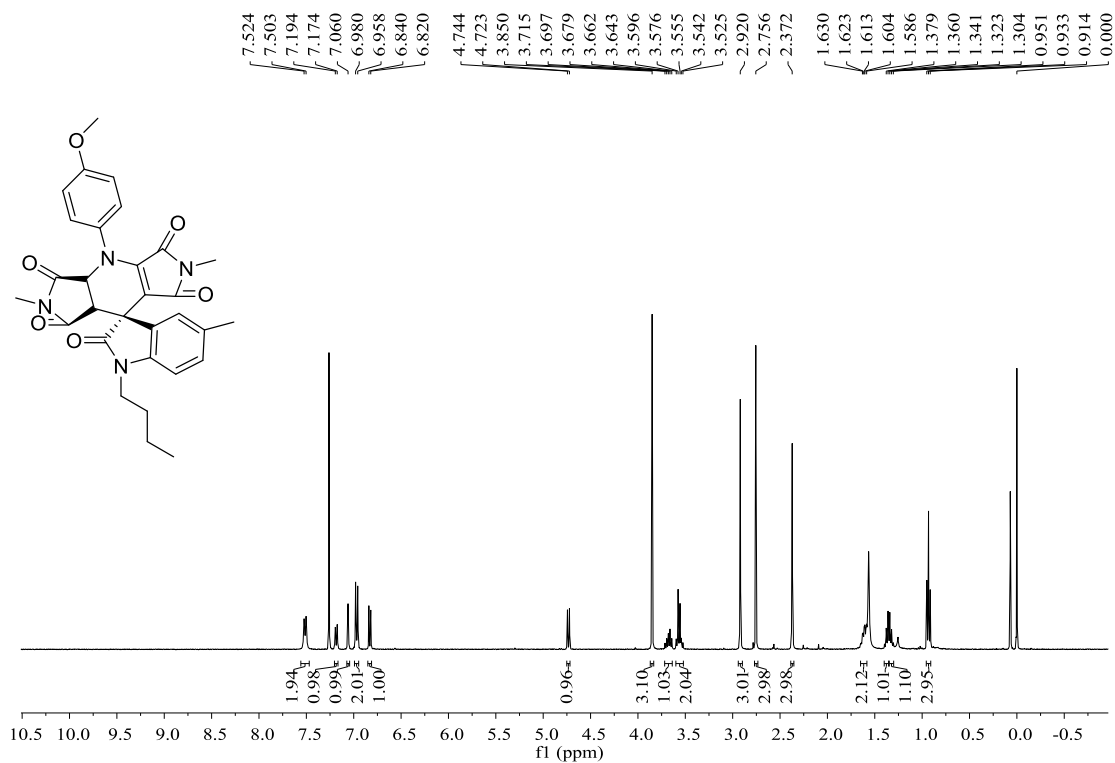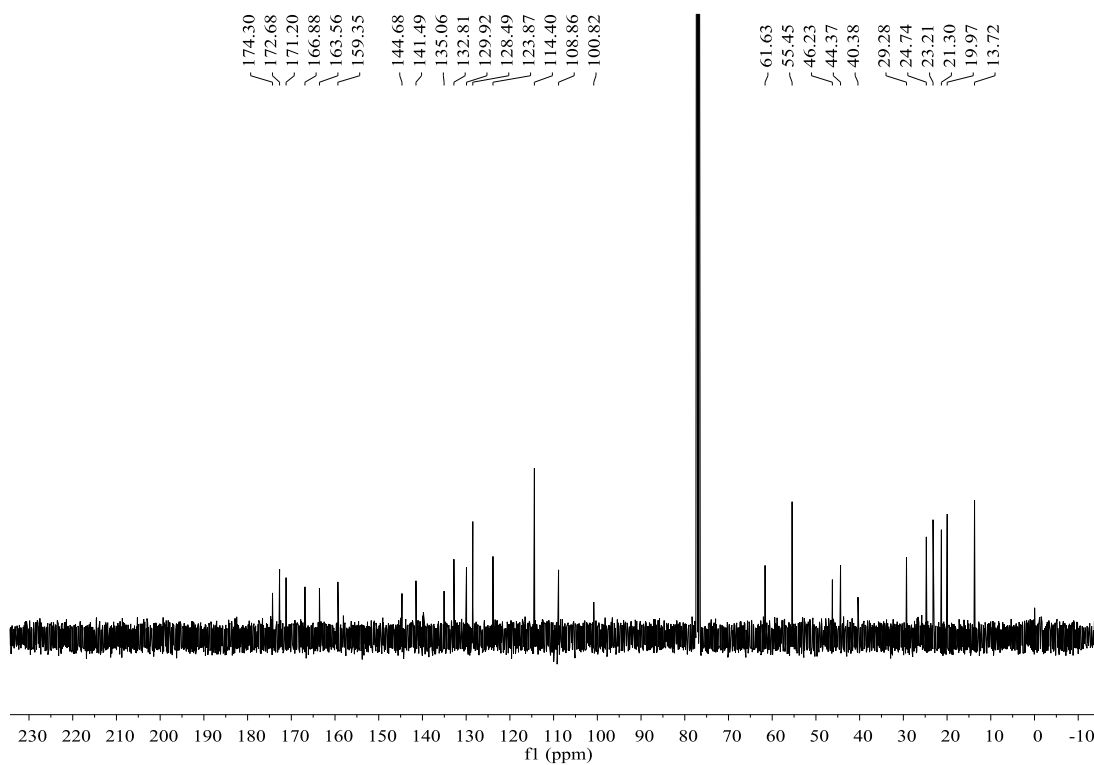

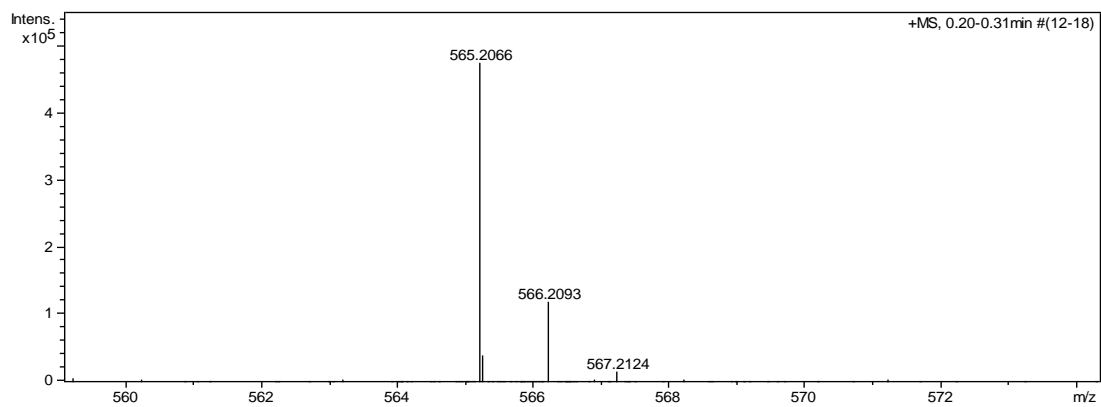

***rel*-(3*aR*,8*S*,8*aS*)-1'-butyl-5'-chloro-2,6-dimethyl-4-phenyl-3*a*,8*a*-dihydro-1*H*-spiro[dipyrrolo [3,4-*b*:3',4'-*e*]pyridine-8,3'-indoline]-1,2',3,5,7(2*H*,4*H*,6*H*)-pentaone (5*g*'):**

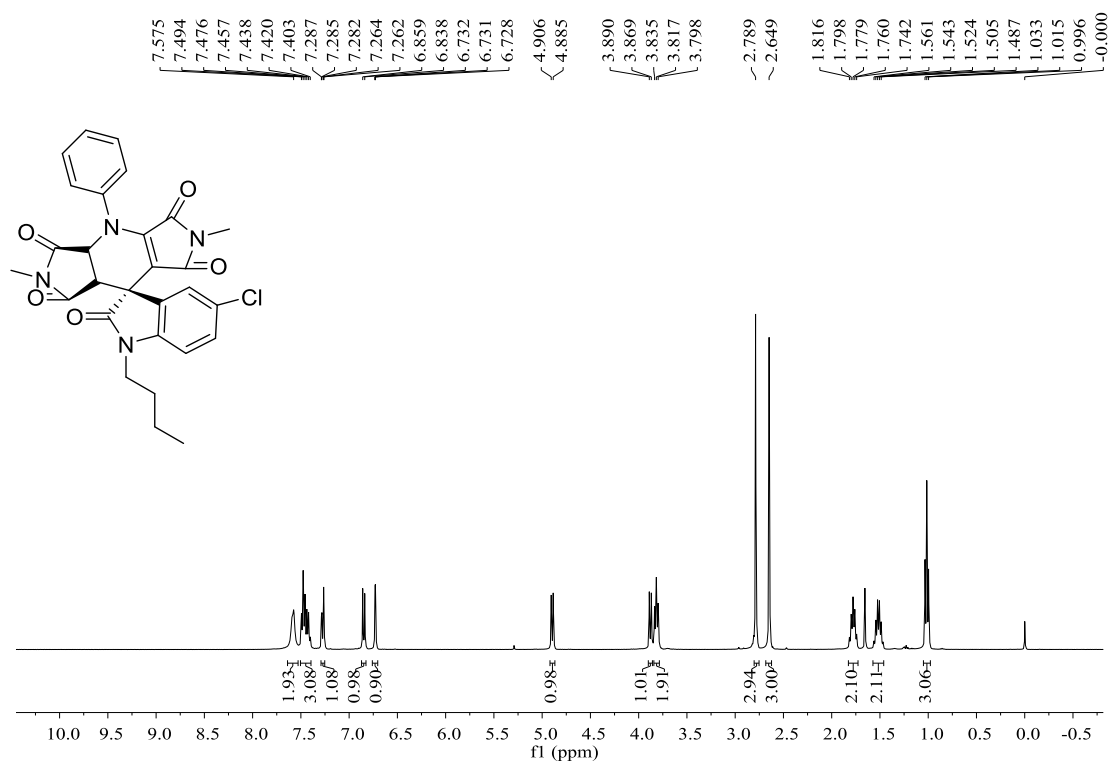

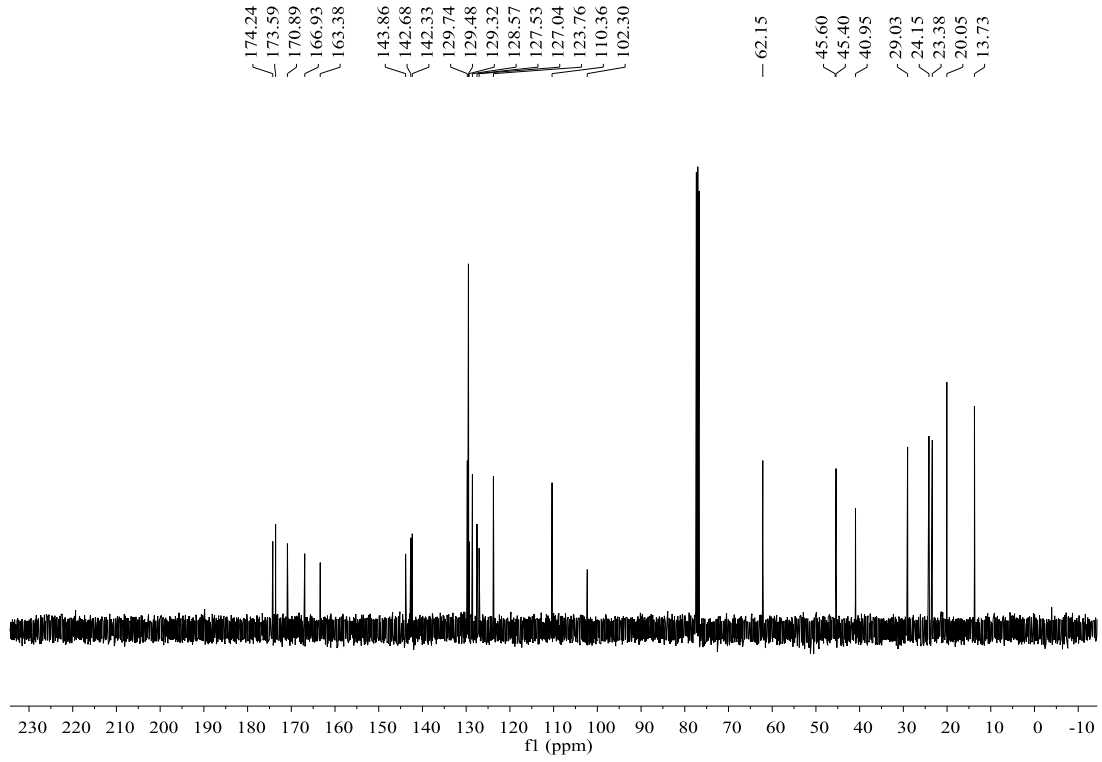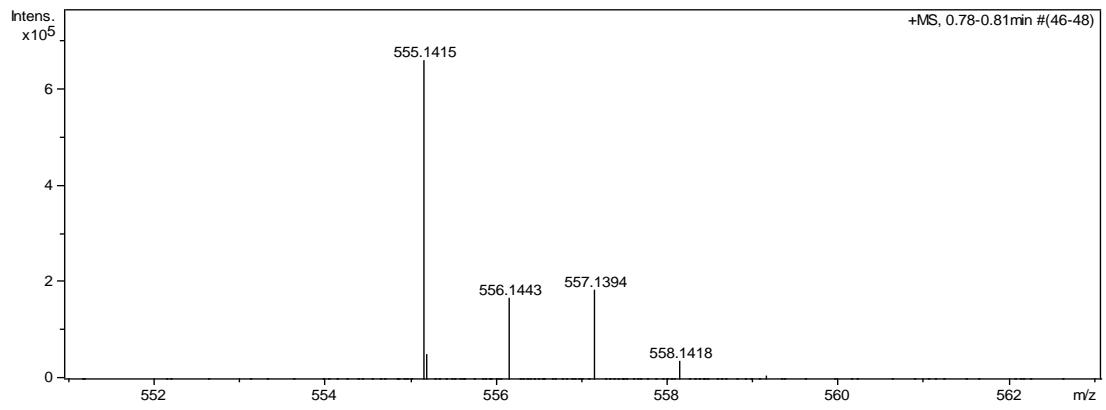

Supplement: d2ob01257j1.pdf [file d2ob01257j1.pdf]
